# Supplementary material for: A Facile Synthesis of 2-Oxazolines via Dehydrative Cyclization Promoted by Triflic Acid
Source: MDPI journal article supplement (doi:10.3390/molecules27249042), 2022-12-19

## Supplementary Materials

### A Facial Synthesis of 2-Oxazolines via Dehydrative Cyclization Promoted by Triflic Acid

Tao Yang <sup>a,b</sup>, Chengjie Huang <sup>a,b</sup>, Jingyang Jia <sup>a,b</sup>, Fan Wu <sup>\*a,b</sup>, Feng Ni <sup>\*a,b</sup>

<sup>a</sup> Institute of Drug Discovery Technology, Ningbo University, Ningbo, Zhejiang, 315211, P. R. China.

<sup>b</sup> Qian Xuesen Collaborative Research Center of Astrochemistry and Space Life Sciences, Ningbo University, Ningbo, Zhejiang, 315211, P. R. China.

E-mail: wufan@nbu.edu.cn (F. W.); nifeng@nbu.edu.cn (F. N.)

#### Content

|                                                                                          |       |
|------------------------------------------------------------------------------------------|-------|
| S1. General Information .....                                                            | 1     |
| S2. Optimization Experiments.....                                                        | 2     |
| S3. Control experiments and mechanistic studies .....                                    | 3–5   |
| S4. Dehydrative Cyclization Reaction and Spectral Characterization of the Products ..... | 6–19  |
| S5. NMR spectrums .....                                                                  | 20–52 |

#### S1. General Information

Commercial reagents were purchased from Adamas, Aldrich, Bide, Energy Chemical, and J&K chemical, and were used as received. Chromatographic purification of products was accomplished using flash chromatography on 200-300 mesh silica gel.  $^1\text{H}$ ,  $^{13}\text{C}$  and  $^{19}\text{F}$  NMR spectra were recorded on a Bruker instrument (500 MHz for  $^1\text{H}$  NMR, 126 MHz for  $^{13}\text{C}$  and 470 MHz for  $^{19}\text{F}$ ) and are internally referenced to chemical shift of residual solvent (for  $\text{CDCl}_3$ , 7.26 and 77.16 ppm, respectively). Data for  $^1\text{H}$  NMR are reported as follows: chemical shift (ppm), multiplicity (s = singlet, d = doublet, t = triplet, q = quartet, m = multiplet, br = broad), integration, coupling constant (Hz).  $^{13}\text{C}$  spectra were recorded as chemical shifts in ppm and multiplicity where appropriate.  $^{19}\text{F}$  NMR data were with complete proton decoupling and the chemical shifts were reported in ppm. High resolution mass spectroscopy (HR-MS) was performed on Thermo Q Exactive Plus (FTMS ESI) mass spectrometer and acetonitrile was used to dissolve the sample.

## **S2. Optimization Experiments**

To an oven-dried 8 mL vial equipped with a magnetic stir bar was added (S)-4-bromo-N-(1-hydroxypropan-2-yl)benzamide (52 mg, 0.2 mmol) and solvent (1 mL), followed by the addition of acid (0.04-0.3 mmol). The reaction mixture was then stirred at the corresponding temperature for 12 hours. After cooling to room temperature, the reaction mixture was diluted with EtOAc (5 mL) and washed with 1M Na<sub>2</sub>CO<sub>3</sub> solution (2 mL). The organic layer was separated, and the aqueous layer was extracted with EtOAc (2 mL×2). The combined organic layers were dried over Na<sub>2</sub>SO<sub>4</sub> and concentrated under reduced pressure to afford the crude product. Then 1,3-benzodioxole (12.2 mg, 0.1 mmol) was added as an internal standard and subjected to <sup>1</sup>H NMR. The NMR yield was calculated based on the integration ratio of products and internal standards.

**Table S1** Reaction optimization <sup>a</sup>

| <div style="display: flex; align-items: center; justify-content: center;"> <div style="text-align: center;"> 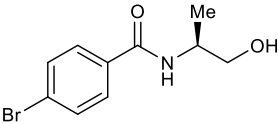 <p>β-hydroxy amide <b>1</b></p> </div> <div style="margin: 0 20px; text-align: center;"> <math>\xrightarrow[\text{solvent, temp}]{\text{acid}}</math> </div> <div style="text-align: center;">  <p>2-Oxazolines <b>2</b></p> </div> </div> |               |                    |             |                        |
|-----------------------------------------------------------------------------------------------------------------------------------------------------------------------------------------------------------------------------------------------------------------------------------------------------------------------------------------------------------------------------------------------------------------------------------------------------------------------------------------------------------------------------|---------------|--------------------|-------------|------------------------|
| Entry                                                                                                                                                                                                                                                                                                                                                                                                                                                                                                                       | acid (equiv.) | solvent            | Temperature | yield (%) <sup>b</sup> |
| 1                                                                                                                                                                                                                                                                                                                                                                                                                                                                                                                           | MsOH (1.0)    | DCE                | 80°C        | 16                     |
| 2                                                                                                                                                                                                                                                                                                                                                                                                                                                                                                                           | TFA (1.0)     | DCE                | 80°C        | 9                      |
| 3                                                                                                                                                                                                                                                                                                                                                                                                                                                                                                                           | TfOH (1.0)    | DCE                | 80°C        | 89                     |
| 4                                                                                                                                                                                                                                                                                                                                                                                                                                                                                                                           | TfOH (0.2)    | DCE                | 80°C        | 14                     |
| 5                                                                                                                                                                                                                                                                                                                                                                                                                                                                                                                           | TfOH (0.5)    | DCE                | 80°C        | 29                     |
| 6                                                                                                                                                                                                                                                                                                                                                                                                                                                                                                                           | TfOH (1.2)    | DCE                | 80°C        | 94                     |
| 7                                                                                                                                                                                                                                                                                                                                                                                                                                                                                                                           | TfOH (1.5)    | DCE                | 80°C        | 96 (88) <sup>c</sup>   |
| 8                                                                                                                                                                                                                                                                                                                                                                                                                                                                                                                           | TfOH (2.0)    | DCE                | 80°C        | 86                     |
| 9                                                                                                                                                                                                                                                                                                                                                                                                                                                                                                                           | TfOH (1.5)    | Toluene            | 80°C        | 92                     |
| 10                                                                                                                                                                                                                                                                                                                                                                                                                                                                                                                          | TfOH (1.5)    | PhCF <sub>3</sub>  | 80°C        | 86                     |
| 11                                                                                                                                                                                                                                                                                                                                                                                                                                                                                                                          | TfOH (1.5)    | CH <sub>3</sub> CN | 80°C        | 95                     |
| 12                                                                                                                                                                                                                                                                                                                                                                                                                                                                                                                          | TfOH (1.5)    | DCE                | 70°C        | 91                     |
| 13                                                                                                                                                                                                                                                                                                                                                                                                                                                                                                                          | TfOH (1.5)    | DCE                | 60°C        | 85                     |
| 14                                                                                                                                                                                                                                                                                                                                                                                                                                                                                                                          | TfOH (1.5)    | DCE                | 25°C        | <5                     |

<sup>a</sup> Reaction conditions: *N*-(2-hydroxyethyl)amide **1** (0.2 mmol), acid (0.2–2.0 equiv) and solvent (1 mL) at 25–80 °C, *t* = 12h. <sup>b</sup> NMR yield using 1,3-benzodioxole as the internal standard; the NMR yield was calculated based on the ratio of CH<sub>2</sub> signal (5.8 ppm) of 1,3-benzodioxole and CH signal of product **2** (4.5 ppm). <sup>c</sup> Isolated yield.

### S3. Control experiments and mechanistic studies

### S3.1 Configuration of C(4) position

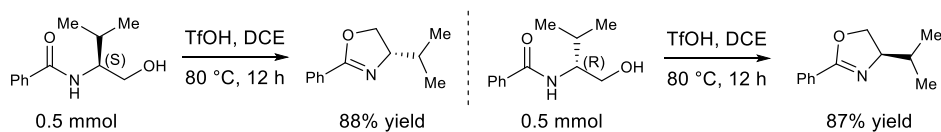

**Figure S1** Control experiments on stereochemical outcome of C(4) position

Enantiopure (S)-N-(1-hydroxy-3-methylbutan-2-yl)benzamide or (R)-N-(1-hydroxy-3-methylbutan-2-yl)benzamide was subjected to standard reaction condition in a 0.5 mmol scale. Oxazoline product was purified by flash column chromatography (10% EtOAc/PE to 30% EtOAc/PE) to afford final product in 88% and 87% yield, respectively. HPLC analysis (OD-H, 2-propanol/n-hexane = 20/80, flow rate = 1.0 mL/min,  $\lambda$  = 258 nm) indicated that no erosion of optical purities on C(4) position.

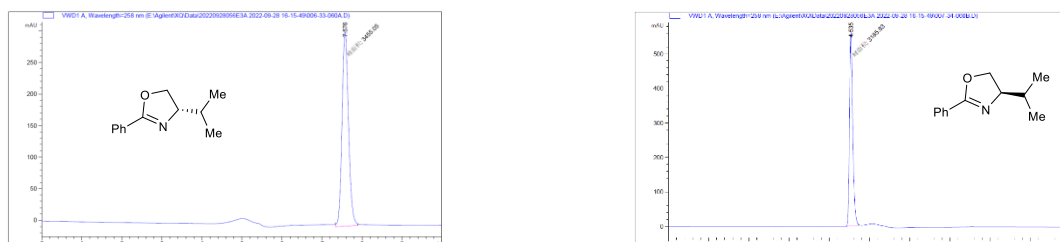

**Figure S2** The HPLC analysis of the (S)-oxazoline **19** and (R)-oxazoline **19**

### S3.2 Cis- and trans- 1-amino-2-indanol derived N-(2-hydroxyethyl)amides as mechanistic probe

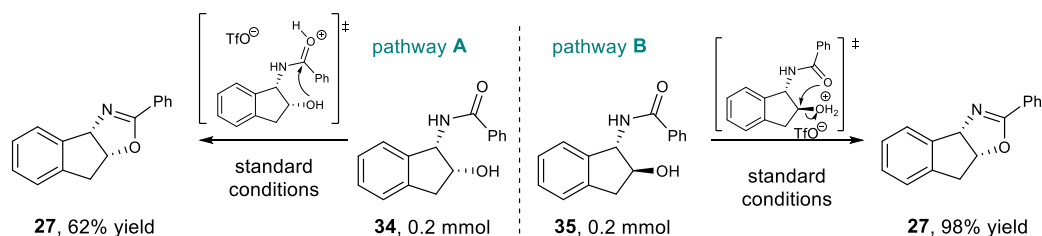

**Figure S3** *Cis*- and *trans*- 1-amino-2-indanol derived mechanistic probe

N-(2-hydroxyethyl)amides **34** and **35** were synthesized from the amidation of (1S,2R)-(-)-cis-1-Amino-2-indanol and (1S,2S)-(+)-trans-1-amino-2-indanol, and treated with TfOH under standard reaction conditions. Product **27** was detected as the single diastereomer for both cases, albeit in different yield. Based on the observation that no optical erosion on C(4) position occur under standard conditions, this result suggest that both pathway A and pathway B are operatable in the reaction condition.

### S3.3 Stereoselectivity of the cyclization process

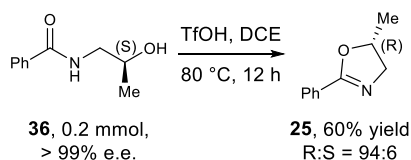

**Figure S4** stereochemical outcome of this protocol

Enantiopure N-(2-hydroxyethyl)amide **36** was subjected to standard reaction condition in a 0.2 mmol scale. Oxazoline product was purified by flash column chromatography (20% EtOAc/PE to 30% EtOAc/PE) to afford final product in 60% yield. HPLC analysis (OD-H, 2-propanol/n-hexane = 5/95, flow rate = 1.0 mL/min,  $\lambda$  = 258 nm) indicated that the product is a mixture of enantiomers in 94:6 ratio.

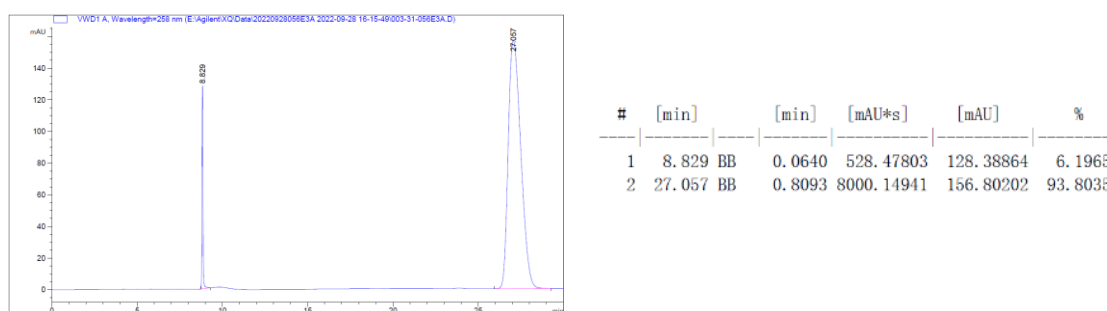

**Figure S5** HPLC analysis of oxazoline product **25**

### S3.4 $^{18}\text{O}$ -labeling study

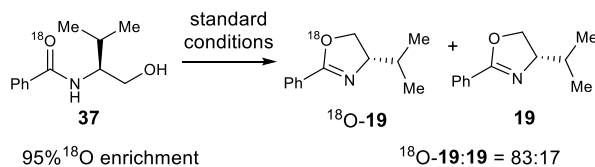

**Figure S6**  $^{18}\text{O}$ -labeling study of product **19**

$^{18}\text{O}$  labeled N-(2-hydroxyethyl)amide **37** was synthesized following reported procedures<sup>1</sup>, and subjected to standard reaction condition in a 0.2 mmol scale. Oxazoline product was purified by flash column chromatography (10% EtOAc/PE to 30% EtOAc/PE) to afford final product in 86% yield. HRMS analysis indicated that the product is the mixture of **18O-19** and **19** in about 83:17 ratio.

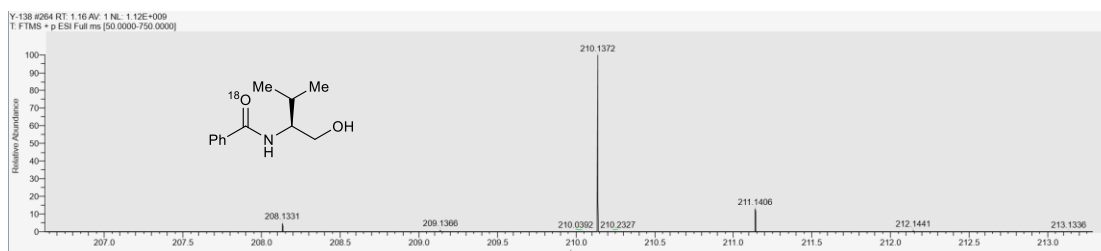

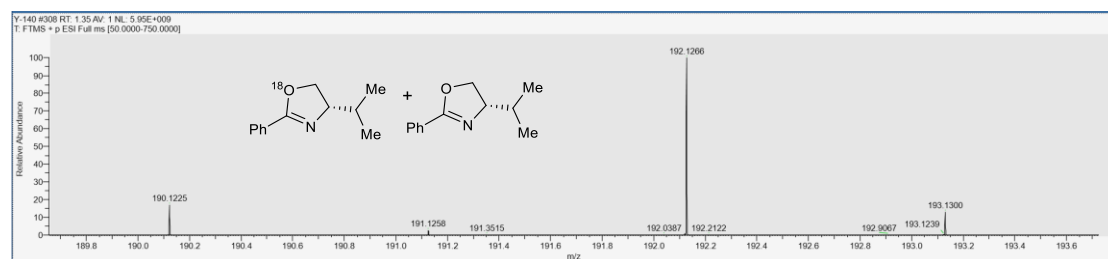

**Figure S7** HRMS data of the  $^{18}\text{O}$ -labeled *N*-(2-hydroxyethyl)amides and oxazoline **19**

## S4. Dehydrative Cyclization of N-(2-hydroxyethyl)amides

### S4.1 General Procedures

#### General Procedure A: dehydrative cyclization of N-(2-hydroxyethyl)amides

To an oven-dried 8 mL vial equipped with a magnetic stir bar was added N-( $\beta$ -Hydroxyethyl)amides (0.2 mmol) and DCE (1 mL), followed by the addition of TfOH (27  $\mu$ L, 0.3 mmol). The reaction mixture was then stirred at 80°C for 12 hours. After cooling to room temperature, the reaction mixture was diluted with EtOAc (5 mL), washed with 1M Na<sub>2</sub>CO<sub>3</sub> solution (2 mL). The organic layer was separated, and the aqueous layer was extracted with EtOAc (2 mL $\times$ 2). The combined organic layers were dried over Na<sub>2</sub>SO<sub>4</sub> and concentrated under reduced pressure to afford the crude product. The crude product was purified by column chromatography to afford pure product.

**General Procedure B (one-pot)** : one-pot synthesis of oxazoline from carboxylic acids and amino alcohols.

To an oven-dried 8 mL vial equipped with a magnetic stir bar was added carboxylic acid (0.2 mmol) and N-Ethynyl-N,4-dimethylbenzenesulfonamide (46 mg, 0.22 mmol), followed by the addition of Toluene (1 mL). The reaction mixture was stirred at 60°C for 3 hours before the addition of corresponding amino alcohol (0.24 mmol). The resulting reaction mixture was stirred at this temperature for another 24 hours. After cooling to room temperature, TfOH (36  $\mu$ L, 0.4 mmol) was added to the reaction mixture and stirred at 80°C for 12 hours. The reaction mixture was cooled to room temperature and diluted with EtOAc (5 mL), washed with 1M Na<sub>2</sub>CO<sub>3</sub> solution (2 mL). The organic layer was separated, and the aqueous layer was extracted with EtOAc (2 mL $\times$ 2). The combined organic layers were dried over Na<sub>2</sub>SO<sub>4</sub> and concentrated under reduced pressure to afford the crude product. The crude product was purified by column chromatography to afford pure product.

### S4.2 Spectral Characterization of the Products

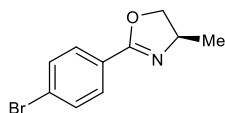

**(R)-2-(4-bromophenyl)-4-methyl-4,5-dihydrooxazole (2):** This compound was prepared according to the General Procedure A, using (R)-4-bromo-N-(1-hydroxypropan-2-yl)benzamide (52.0 mg, 0.2 mmol), trifluoromethanesulfonic acid (45.0 mg, 27 $\mu$ L, 0.3 mmol). After purification by column chromatography (SiO<sub>2</sub>, 20% EtOAc in PE to 40% EtOAc in PE), the title compound was isolated as a white solid (42.1 mg, 88% yield). <sup>1</sup>H NMR (500 MHz, CDCl<sub>3</sub>)  $\delta$  7.79 (d,  $J$  = 8.4 Hz, 2H), 7.53 (d,  $J$  = 8.4 Hz, 2H), 4.53 (dd,  $J$  = 9.4, 8.0 Hz, 1H), 4.43 – 4.32 (m, 1H), 3.96 (t,  $J$  = 8.0 Hz, 1H), 1.37 (d,  $J$  = 6.6 Hz, 3H).

<sup>13</sup>C NMR (126 MHz, CDCl<sub>3</sub>)  $\delta$  162.9, 131.7, 129.9, 126.9, 126.0, 74.4, 62.2, 21.5.

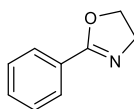

**2-phenyl-4,5-dihydrooxazole (3):** This compound was prepared according to the General Procedure A, using N-(2-hydroxyethyl)benzamide (33.0 mg, 0.2 mmol), trifluoromethanesulfonic acid (45.0 mg, 27 $\mu$ L, 0.3 mmol). After purification by column chromatography (SiO<sub>2</sub>, 20% EtOAc in PE to 50% EtOAc in PE), the title compound was isolated as a white solid (18.3 mg, 62% yield). <sup>1</sup>H NMR (500 MHz, CDCl<sub>3</sub>)  $\delta$  8.01 – 7.89 (m, 2H), 7.49 – 7.44 (m, 1H), 7.43 – 7.36 (m, 2H), 4.42 (t,  $J$  = 9.5 Hz, 2H), 4.05 (t,  $J$  = 9.5 Hz, 2H).

<sup>13</sup>C NMR (126 MHz, CDCl<sub>3</sub>)  $\delta$  164.8, 131.4, 128.5, 128.3, 127.8, 67.7, 55.0.

HRMS (ESI)  $m/z$  calcd for C<sub>9</sub>H<sub>10</sub>NO<sup>+</sup> [(M+H)<sup>+</sup>] 148.0757, found 148.0755.

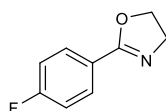

**2-(4-fluorophenyl)-4,5-dihydrooxazole (4):** This compound was prepared according to the General Procedure A, using 4-fluoro-N-(2-hydroxyethyl)benzamide (36.6 mg, 0.2 mmol), trifluoromethanesulfonic acid (45.0 mg, 27 $\mu$ L, 0.3 mmol). After purification by column chromatography (SiO<sub>2</sub>, 20% EtOAc in PE to 50% EtOAc in PE), the title compound was isolated as a yellow solid (24.9 mg, 75% yield).

<sup>1</sup>H NMR (500 MHz, CDCl<sub>3</sub>)  $\delta$  8.02 – 7.87 (m, 2H), 7.16 – 7.01 (m, 2H), 4.42 (t,  $J$  = 9.5 Hz, 2H), 4.04 (t,  $J$  = 9.5 Hz, 2H).

<sup>13</sup>C NMR (126 MHz, CDCl<sub>3</sub>)  $\delta$  165.8, 163.9, 163.8, 130.6, 130.5, 124.1, 124.1, 115.7, 115.5, 67.9, 55.0.



$^{19}\text{F}$  NMR (471 MHz,  $\text{CDCl}_3$ )  $\delta$  -108.37.

HRMS (ESI)  $m/z$  calcd for  $\text{C}_9\text{H}_9\text{FNO}^+$   $[(\text{M}+\text{H})^+]$  166.0663, found 166.0660.

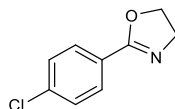

**2-(4-chlorophenyl)-4,5-dihydrooxazole (5):** This compound was prepared according to the General Procedure A, using 4-chloro-N-(2-hydroxyethyl)benzamide (39.9 mg, 0.2 mmol), trifluoromethanesulfonic acid (45.0 mg, 27  $\mu\text{L}$ , 0.3 mmol). After purification by column chromatography ( $\text{SiO}_2$ , 20% EtOAc in PE to 50% EtOAc in PE), the title compound was isolated as a off-white solid (31.1 mg, 86% yield).

$^1\text{H}$  NMR (500 MHz,  $\text{CDCl}_3$ )  $\delta$  7.94 – 7.83 (m, 2H), 7.44 – 7.34 (m, 2H), 4.42 (t,  $J$  = 9.5 Hz, 2H), 4.05 (t,  $J$  = 9.5 Hz, 2H).

$^{13}\text{C}$  NMR (126 MHz,  $\text{CDCl}_3$ )  $\delta$  164.0, 137.6, 129.6, 128.8, 126.4, 67.9, 55.1.

HRMS (ESI)  $m/z$  calcd for  $\text{C}_9\text{H}_9\text{ClNO}^+$   $[(\text{M}+\text{H})^+]$  182.0367, found 182.0365.

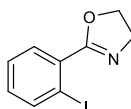

**2-(2-iodophenyl)-4,5-dihydrooxazole (6):** This compound was prepared according to the General Procedure A, using N-(2-hydroxyethyl)-2-iodobenzamide (58.2 mg, 0.2 mmol), trifluoromethanesulfonic acid (45.0 mg, 27  $\mu\text{L}$ , 0.3 mmol). After purification by column chromatography ( $\text{SiO}_2$ , 20% EtOAc in PE to 50% EtOAc in PE), the title compound was isolated as a white solid (49.7 mg, 91% yield).

$^1\text{H}$  NMR (500 MHz,  $\text{CDCl}_3$ )  $\delta$  7.93 (dd,  $J$  = 7.9, 1.2 Hz, 1H), 7.62 (dd,  $J$  = 7.8, 1.8 Hz, 1H), 7.43 – 7.32 (m, 1H), 7.14 – 7.04 (m, 1H), 4.44 (t,  $J$  = 9.6 Hz, 2H), 4.09 (t,  $J$  = 9.6 Hz, 2H).

$^{13}\text{C}$  NMR (126 MHz,  $\text{CDCl}_3$ )  $\delta$  165.0, 140.6, 133.6, 131.7, 130.8, 127.9, 94.7, 67.9, 55.3.

HRMS (ESI)  $m/z$  calcd for  $\text{C}_9\text{H}_9\text{INO}^+$   $[(\text{M}+\text{H})^+]$  273.9723, found 273.9720.

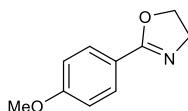

**2-(4-methoxyphenyl)-4,5-dihydrooxazole (7):** This compound was prepared according to the General Procedure A, using N-(2-hydroxyethyl)-4-methoxybenzamide (39.0 mg, 0.2 mmol), trifluoromethanesulfonic acid (45.0 mg, 27  $\mu\text{L}$ , 0.3 mmol). After purification by column chromatography ( $\text{SiO}_2$ , 30% EtOAc in PE to 70% EtOAc in PE), the title compound was isolated

as a off-white solid (33.8 mg, 95% yield).

$^1\text{H}$  NMR (500 MHz,  $\text{CDCl}_3$ )  $\delta$  7.94 – 7.82 (m, 2H), 6.97 – 6.86 (m, 2H), 4.39 (t,  $J$  = 9.4 Hz, 2H), 4.01 (t,  $J$  = 9.4 Hz, 2H), 3.82 (s, 3H).

$^{13}\text{C}$  NMR (126 MHz,  $\text{CDCl}_3$ )  $\delta$  164.7, 162.2, 130.0, 120.3, 113.8, 67.6, 55.4, 54.8.

HRMS (ESI)  $m/z$  calcd for  $\text{C}_{10}\text{H}_{12}\text{NO}_2^+$  [(M+H) $^+$ ] 178.0863, found 178.0861.

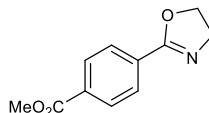

**methyl 4-(4,5-dihydrooxazol-2-yl)benzoate (8):** This compound was prepared according to the General Procedure A, using methyl 4-((2-hydroxyethyl)carbamoyl)benzoate (44.6 mg, 0.2 mmol), trifluoromethanesulfonic acid (45.0 mg, 27 $\mu\text{L}$ , 0.3 mmol). After purification by column chromatography ( $\text{SiO}_2$ , 20% EtOAc in PE to 60% EtOAc in PE), the title compound was isolated as a white solid (28.5 mg, 70% yield).

$^1\text{H}$  NMR (500 MHz,  $\text{CDCl}_3$ )  $\delta$  8.12 – 8.03 (m, 2H), 7.99 (d,  $J$  = 8.5 Hz, 2H), 4.44 (t,  $J$  = 9.5 Hz, 2H), 4.07 (t,  $J$  = 9.6 Hz, 2H), 3.91 (s, 3H).

$^{13}\text{C}$  NMR (126 MHz,  $\text{CDCl}_3$ )  $\delta$  166.6, 164.0, 132.6, 131.8, 129.7, 128.3, 68.0, 55.2, 52.4.

HRMS (ESI)  $m/z$  calcd for  $\text{C}_{11}\text{H}_{12}\text{NO}_3^+$  [(M+H) $^+$ ] 206.0812, found 206.0810.

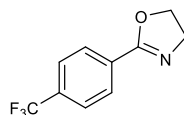

**2-(4-(trifluoromethyl)phenyl)-4,5-dihydrooxazole (9):** This compound was prepared according to the General Procedure A, using N-(2-hydroxyethyl)-4-(trifluoromethyl)benzamide (46.6 mg, 0.2 mmol), trifluoromethanesulfonic acid (45.0 mg, 27 $\mu\text{L}$ , 0.3 mmol). After purification by column chromatography ( $\text{SiO}_2$ , 20% EtOAc in PE to 60% EtOAc in PE), the title compound was isolated as a white solid (29.5 mg, 69% yield).

$^1\text{H}$  NMR (500 MHz,  $\text{CDCl}_3$ )  $\delta$  8.05 (d,  $J$  = 8.1 Hz, 2H), 7.66 (d,  $J$  = 8.2 Hz, 2H), 4.46 (t,  $J$  = 9.6 Hz, 2H), 4.08 (t,  $J$  = 9.6 Hz, 2H).

$^{13}\text{C}$  NMR (126 MHz,  $\text{CDCl}_3$ )  $\delta$  163.6, 133.0 (q,  $J_{\text{C-F}}$  = 32.8 Hz), 131.2, 128.7, 125.45 (q,  $J_{\text{C-F}}$  = 3.8 Hz), 123.9 (q,  $J_{\text{C-F}}$  = 273.4 Hz), 68.0, 55.2.

$^{19}\text{F}$  NMR (471 MHz,  $\text{CDCl}_3$ )  $\delta$  -62.96.

HRMS (ESI)  $m/z$  calcd for  $\text{C}_{10}\text{H}_9\text{F}_3\text{NO}^+$  [(M+H) $^+$ ] 216.0631, found 216.0629.

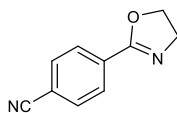

**4-(4,5-dihydrooxazol-2-yl)benzonitrile (10):** This compound was prepared according to the General Procedure A (60 °C instead of 80 °C), using 4-cyano-N-(2-hydroxyethyl)benzamide (38.0 mg, 0.2 mmol), trifluoromethanesulfonic acid (45.0 mg, 27 $\mu$ L, 0.3 mmol). After purification by column chromatography (SiO<sub>2</sub>, 20% EtOAc in PE to 50% EtOAc in PE), the title compound was isolated as a white solid (19.4 mg, 56% yield).

<sup>1</sup>H NMR (500 MHz, CDCl<sub>3</sub>)  $\delta$  8.12 – 7.97 (m, 2H), 7.76 – 7.64 (m, 2H), 4.47 (t,  $J$  = 9.6 Hz, 2H), 4.10 (t,  $J$  = 9.6 Hz, 2H).

<sup>13</sup>C NMR (126 MHz, CDCl<sub>3</sub>)  $\delta$  163.3, 132.3, 132.0, 128.9, 118.4, 114.9, 68.2, 55.3.

HRMS (ESI)  $m/z$  calcd for C<sub>10</sub>H<sub>9</sub>N<sub>2</sub>O<sup>+</sup> [(M+H)<sup>+</sup>] 173.0709, found 173.0708.

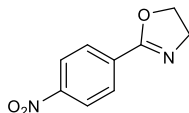

**2-(4-nitrophenyl)-4,5-dihydrooxazole (11):** This compound was prepared according to the General Procedure A, using N-(2-hydroxyethyl)-4-nitrobenzamide (42.0 mg, 0.2 mmol), trifluoromethanesulfonic acid (45.0 mg, 27 $\mu$ L, 0.3 mmol). After purification by column chromatography (SiO<sub>2</sub>, 30% EtOAc in PE to 50% EtOAc in PE), the title compound was isolated as a yellow solid (30.6 mg, 80% yield).

<sup>1</sup>H NMR (500 MHz, CDCl<sub>3</sub>)  $\delta$  8.34 – 8.20 (m, 2H), 8.19 – 8.03 (m, 2H), 4.48 (t,  $J$  = 9.6 Hz, 2H), 4.10 (t,  $J$  = 9.6 Hz, 2H).

<sup>13</sup>C NMR (126 MHz, CDCl<sub>3</sub>)  $\delta$  163.0, 149.6, 133.6, 129.3, 123.6, 68.3, 55.3.

HRMS (ESI)  $m/z$  calcd for C<sub>9</sub>H<sub>9</sub>N<sub>2</sub>O<sub>3</sub><sup>+</sup> [(M+H)<sup>+</sup>] 193.0608, found 193.0607.

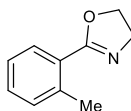

**2-(o-tolyl)-4,5-dihydrooxazole (12):** This compound was prepared according to the General Procedure A, using N-(2-hydroxyethyl)-2-methylbenzamide (35.8 mg, 0.2 mmol), trifluoromethanesulfonic acid (45.0 mg, 27 $\mu$ L, 0.3 mmol). After purification by column chromatography (SiO<sub>2</sub>, 20% EtOAc in PE to 40% EtOAc in PE), the title compound was isolated as a colorless oil (27.3 mg, 85% yield).

$^1\text{H}$  NMR (500 MHz,  $\text{CDCl}_3$ )  $\delta$  7.79 (dd,  $J = 7.7, 1.5$  Hz, 1H), 7.40 – 7.29 (m, 1H), 7.25 – 7.18 (m, 2H), 4.42 – 4.34 (m, 2H), 4.08 (t,  $J = 9.5$  Hz, 2H), 2.58 (s, 3H).

$^{13}\text{C}$  NMR (126 MHz,  $\text{CDCl}_3$ )  $\delta$  165.2, 138.8, 131.3, 130.6, 129.9, 127.3, 125.7, 66.9, 55.4, 21.8.

HRMS (ESI)  $m/z$  calcd for  $\text{C}_{10}\text{H}_{12}\text{NO}^+$  [(M+H) $^+$ ] 162.0913, found 162.0911.

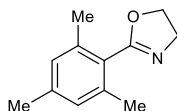

**2-mesityl-4,5-dihydrooxazole (13):** This compound was prepared according to the General Procedure A, using N-(2-hydroxyethyl)-2,4,6-trimethylbenzamide (41.5 mg, 0.2 mmol), trifluoromethanesulfonic acid (45.0 mg, 27  $\mu\text{L}$ , 0.3 mmol). After purification by column chromatography ( $\text{SiO}_2$ , 10% EtOAc in PE to 30% EtOAc in PE), the title compound was isolated as a white solid (32.0 mg, 85% yield).

$^1\text{H}$  NMR (500 MHz,  $\text{CDCl}_3$ )  $\delta$  6.85 (s, 2H), 4.38 (t,  $J = 9.5$  Hz, 2H), 4.08 (t,  $J = 9.5$  Hz, 2H), 2.29 (s, 6H), 2.27 (s, 3H).

$^{13}\text{C}$  NMR (126 MHz,  $\text{CDCl}_3$ )  $\delta$  165.2, 139.2, 137.0, 128.3, 126.1, 67.2, 55.3, 21.3, 19.8.

HRMS (ESI)  $m/z$  calcd for  $\text{C}_{12}\text{H}_{16}\text{NO}^+$  [(M+H) $^+$ ] 190.1226, found 190.1224.

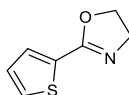

**2-(thiophen-2-yl)-4,5-dihydrooxazole (14):** This compound was prepared according to the General Procedure A, using N-(2-hydroxyethyl)thiophene-2-carboxamide (34.2 mg, 0.2 mmol), trifluoromethanesulfonic acid (45.0 mg, 27  $\mu\text{L}$ , 0.3 mmol). After purification by column chromatography ( $\text{SiO}_2$ , 20% EtOAc in PE to 40% EtOAc in PE), the title compound was isolated as a white solid (29.4 mg, 96% yield).

$^1\text{H}$  NMR (500 MHz,  $\text{CDCl}_3$ )  $\delta$  7.58 (dd,  $J = 3.8, 1.1$  Hz, 1H), 7.43 (dd,  $J = 5.1, 1.2$  Hz, 1H), 7.06 (dd,  $J = 5.0, 3.7$  Hz, 1H), 4.41 (t,  $J = 9.4$  Hz, 2H), 4.02 (t,  $J = 9.4$  Hz, 2H).

$^{13}\text{C}$  NMR (126 MHz,  $\text{CDCl}_3$ )  $\delta$  160.5, 130.4, 130.3, 129.9, 127.7, 68.2, 55.0.

HRMS (ESI)  $m/z$  calcd for  $\text{C}_7\text{H}_8\text{NOS}^+$  [(M+H) $^+$ ] 154.0321, found 154.0320.

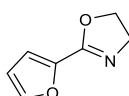

**2-(furan-2-yl)-4,5-dihydrooxazole (15):** This compound was prepared according to the General Procedure A, using N-(2-hydroxyethyl)furan-2-carboxamide (31.0 mg, 0.2 mmol),

trifluoromethanesulfonic acid (45.0 mg, 27 $\mu$ L, 0.3 mmol). After purification by column chromatography (SiO<sub>2</sub>, 30% EtOAc in PE to 50% EtOAc in PE), the title compound was isolated as a yellow solid (20.0 mg, 73% yield).

<sup>1</sup>H NMR (500 MHz, CDCl<sub>3</sub>)  $\delta$  7.52 (d,  $J$  = 1.8 Hz, 1H), 6.93 (d,  $J$  = 3.5 Hz, 1H), 6.46 (dd,  $J$  = 3.5, 1.8 Hz, 1H), 4.39 (t,  $J$  = 9.4 Hz, 2H), 4.03 (t,  $J$  = 9.4 Hz, 2H).

<sup>13</sup>C NMR (126 MHz, CDCl<sub>3</sub>)  $\delta$  157.1, 145.3, 143.1, 114.3, 111.6, 67.8, 54.9.

HRMS (ESI)  $m/z$  calcd for C<sub>7</sub>H<sub>8</sub>NO<sub>2</sub><sup>+</sup> [(M+H)<sup>+</sup>] 138.0550, found 138.0549.

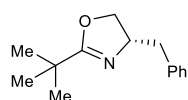

**(S)-4-benzyl-2-(tert-butyl)-4,5-dihydrooxazole (16):** This compound was prepared according to the General Procedure A, using (S)-N-(1-hydroxy-3-phenylpropan-2-yl)pivalamide (47.1 mg, 0.2 mmol), trifluoromethanesulfonic acid (45.0 mg, 27 $\mu$ L, 0.3 mmol). After purification by column chromatography (SiO<sub>2</sub>, 10% EtOAc in PE to 30% EtOAc in PE), the title compound was isolated as a colorless oil (25.4mg, 58% yield).

<sup>1</sup>H NMR (500 MHz, CDCl<sub>3</sub>)  $\delta$  7.35 – 7.29 (m, 2H), 7.28 – 7.19 (m, 3H), 4.45 – 4.34 (m, 1H), 4.15 (dd,  $J$  = 9.3, 8.4 Hz, 1H), 4.00 (dd,  $J$  = 8.5, 6.7 Hz, 1H), 3.12 (dd,  $J$  = 13.7, 4.5 Hz, 1H), 2.68 (dd,  $J$  = 13.6, 8.5 Hz, 1H), 1.22 (s, 9H).

<sup>13</sup>C NMR (126 MHz, CDCl<sub>3</sub>)  $\delta$  174.5, 137.9, 129.6, 128.5, 126.5, 71.5, 66.9, 41.6, 33.2, 27.9.

HRMS (ESI)  $m/z$  calcd for C<sub>14</sub>H<sub>20</sub>NO<sup>+</sup> [(M+H)<sup>+</sup>] 218.1539, found 218.1536.

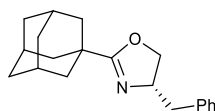

**(S)-2-((3S,5S,7S)-adamantan-1-yl)-4-benzyl-4,5-dihydrooxazole (17):** This compound was prepared according to the General Procedure A, using (3S,5S,7S)-N-((S)-1-hydroxy-3-phenylpropan-2-yl)adamantane-1-carboxamide (62.7 mg, 0.2 mmol), trifluoromethanesulfonic acid (45.0 mg, 27 $\mu$ L, 0.3 mmol). After purification by column chromatography (SiO<sub>2</sub>, 10% EtOAc in PE to 30% EtOAc in PE), the title compound was isolated as a colorless oil (50.1 mg, 85% yield).

<sup>1</sup>H NMR (500 MHz, CDCl<sub>3</sub>)  $\delta$  7.30 (t,  $J$  = 7.4 Hz, 2H), 7.21 (dd,  $J$  = 7.6, 5.9 Hz, 3H), 4.41 – 4.31 (m, 1H), 4.10 (t,  $J$  = 8.9 Hz, 1H), 3.94 (dd,  $J$  = 8.5, 6.8 Hz, 1H), 3.11 (dd,  $J$  = 13.7, 4.6 Hz, 1H), 2.64 (dd,  $J$  = 13.7, 8.6 Hz, 1H), 2.05 – 1.99 (m, 3H), 1.94 – 1.83 (m, 6H), 1.79 – 1.69 (m, 6H).

$^{13}\text{C}$  NMR (126 MHz,  $\text{CDCl}_3$ )  $\delta$  173.9, 138.0, 129.6, 128.5, 126.5, 71.1, 66.7, 41.8, 39.6, 36.7, 35.2, 28.0.

HRMS (ESI)  $m/z$  calcd for  $\text{C}_{20}\text{H}_{26}\text{NO}^+$   $[(\text{M}+\text{H})^+]$  296.2009, found 296.2004.

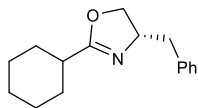

**(S)-4-benzyl-2-cyclohexyl-4,5-dihydrooxazole (18):** This compound was prepared according to the General Procedure A, using (S)-N-(1-hydroxy-3-phenylpropan-2-yl)cyclohexanecarboxamide (52.3 mg, 0.2 mmol), trifluoromethanesulfonic acid (45.0 mg, 27  $\mu\text{L}$ , 0.3 mmol). After purification by column chromatography ( $\text{SiO}_2$ , 10% EtOAc in PE to 30% EtOAc in PE), the title compound was isolated as a white solid (24.8 mg, 51% yield).

This compound was also prepared according to General Procedure B, using cyclohexanecarboxylic acid (25.6 mg, 0.2 mmol), N-ethynyl-N,4-dimethylbenzenesulfonamide (46.0 mg, 0.22 mmol), (S)-2-amino-3-phenylpropan-1-ol (36.3 mg, 0.24 mmol), trifluoromethanesulfonic acid (45.0 mg, 27  $\mu\text{L}$ , 0.3 mmol). After purification by column chromatography ( $\text{SiO}_2$ , 5% EtOAc in PE to 20% EtOAc in PE), the title compound was isolated as a white solid (25.0 mg, 51% yield).

$^1\text{H}$  NMR (500 MHz,  $\text{CDCl}_3$ )  $\delta$  7.28 (t,  $J = 7.4$  Hz, 2H), 7.25 – 7.15 (m, 3H), 4.42 – 4.30 (m, 1H), 4.11 (t,  $J = 8.9$  Hz, 1H), 3.92 (dd,  $J = 8.5, 6.9$  Hz, 1H), 3.08 (dd,  $J = 13.7, 4.8$  Hz, 1H), 2.63 (dd,  $J = 13.7, 8.6$  Hz, 1H), 2.30 – 2.21 (m, 1H), 1.94 – 1.85 (m, 2H), 1.79 – 1.72 (m, 2H), 1.69 – 1.62 (m, 1H), 1.45 – 1.35 (m, 2H), 1.31 – 1.21 (m, 3H).

$^{13}\text{C}$  NMR (126 MHz,  $\text{CDCl}_3$ )  $\delta$  171.5, 138.0, 129.5, 128.6, 126.5, 71.3, 67.0, 41.8, 37.5, 30.0, 29.9, 26.0, 25.8, 25.7.

HRMS (ESI)  $m/z$  calcd for  $\text{C}_{16}\text{H}_{22}\text{NO}^+$   $[(\text{M}+\text{H})^+]$  244.1696, found 244.1692.

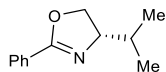

**(S)-4-isopropyl-2-phenyl-4,5-dihydrooxazole (19):** This compound was prepared according to the General Procedure A, using (S)-N-(1-hydroxy-3-methylbutan-2-yl)benzamide (41.5 mg, 0.2 mmol), trifluoromethanesulfonic acid (45.0 mg, 27  $\mu\text{L}$ , 0.3 mmol). After purification by column chromatography ( $\text{SiO}_2$ , 5% EtOAc in PE to 20% EtOAc in PE), the title compound was isolated as a colorless oil (33.2 mg, 88% yield).

$^1\text{H}$  NMR (500 MHz,  $\text{CDCl}_3$ )  $\delta$  8.14 – 7.90 (m, 2H), 7.49 – 7.44 (m, 1H), 7.44 – 7.33 (m, 2H), 4.46 – 4.35 (m, 1H), 4.21 – 4.05 (m, 2H), 1.93 – 1.81 (m, 1H), 1.03 (d,  $J$  = 6.8 Hz, 3H), 0.92 (d,  $J$  = 6.8 Hz, 3H).

$^{13}\text{C}$  NMR (126 MHz,  $\text{CDCl}_3$ )  $\delta$  163.5, 131.3, 128.4, 128.4, 128.0, 72.7, 70.2, 32.9, 19.1, 18.2.

HRMS (ESI)  $m/z$  calcd for  $\text{C}_{12}\text{H}_{16}\text{NO}^+$  [(M+H) $^+$ ] 190.1226, found 190.1225.

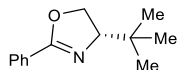

**(S)-4-(tert-butyl)-2-phenyl-4,5-dihydrooxazole (20):** This compound was prepared according to the General Procedure A, using (S)-N-(1-hydroxy-3,3-dimethylbutan-2-yl)benzamide (44.3 mg, 0.2 mmol), trifluoromethanesulfonic acid (45.0 mg, 27 $\mu\text{L}$ , 0.3 mmol). After purification by column chromatography ( $\text{SiO}_2$ , 5% EtOAc in PE to 20% EtOAc in PE), the title compound was isolated as a colorless oil (31.0 mg, 76% yield).

$^1\text{H}$  NMR (500 MHz,  $\text{CDCl}_3$ )  $\delta$  8.02 – 7.91 (m, 2H), 7.49 – 7.43 (m, 1H), 7.43 – 7.36 (m, 2H), 4.34 (dd,  $J$  = 10.1, 8.6 Hz, 1H), 4.24 (dd,  $J$  = 8.6, 7.7 Hz, 1H), 4.05 (dd,  $J$  = 10.1, 7.7 Hz, 1H), 0.96 (s, 9H).

$^{13}\text{C}$  NMR (126 MHz,  $\text{CDCl}_3$ )  $\delta$  163.4, 131.3, 128.4, 128.4, 128.1, 76.3, 68.8, 34.2, 26.0.

HRMS (ESI)  $m/z$  calcd for  $\text{C}_{13}\text{H}_{18}\text{NO}^+$  [(M+H) $^+$ ] 204.1383, found 204.1380.

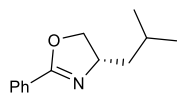

**(S)-4-isobutyl-2-phenyl-4,5-dihydrooxazole (21):** This compound was prepared according to the General Procedure A, using (S)-N-(1-hydroxy-4-methylpentan-2-yl)benzamide (44.3 mg, 0.2 mmol), trifluoromethanesulfonic acid (45.0 mg, 27 $\mu\text{L}$ , 0.3 mmol). After purification by column chromatography ( $\text{SiO}_2$ , 5% EtOAc in PE to 20% EtOAc in PE), the title compound was isolated as a colorless oil (33.0 mg, 81% yield).

$^1\text{H}$  NMR (500 MHz,  $\text{CDCl}_3$ )  $\delta$  8.00 – 7.89 (m, 2H), 7.48 – 7.43 (m, 1H), 7.42 – 7.36 (m, 2H), 4.50 (dd,  $J$  = 9.3, 8.0 Hz, 1H), 4.37 – 4.28 (m, 1H), 3.99 (t,  $J$  = 8.0 Hz, 1H), 1.87 – 1.76 (m, 1H), 1.76 – 1.67 (m, 1H), 1.42 – 1.34 (m, 1H), 0.98 (t,  $J$  = 7.0 Hz, 6H).

$^{13}\text{C}$  NMR (126 MHz,  $\text{CDCl}_3$ )  $\delta$  163.4, 131.3, 128.4, 128.3, 128.1, 73.2, 65.3, 45.7, 25.6, 23.1, 22.8.

HRMS (ESI)  $m/z$  calcd for  $\text{C}_{13}\text{H}_{18}\text{NO}^+$  [(M+H) $^+$ ] 204.1383, found 204.1381.

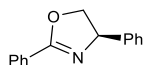

**(R)-2,4-diphenyl-4,5-dihydrooxazole (22):** This compound was prepared according to the General Procedure A, using (R)-N-(2-hydroxy-1-phenylethyl)benzamide (48.3mg, 0.2 mmol), trifluoromethanesulfonic acid (45.0 mg, 27 $\mu$ L, 0.3 mmol). After purification by column chromatography (SiO<sub>2</sub>, 10% EtOAc in PE to 30% EtOAc in PE), the title compound was isolated as a yellow oil (40.6 mg, 91% yield).

<sup>1</sup>H NMR (500 MHz, CDCl<sub>3</sub>)  $\delta$  8.11 – 8.02 (m, 2H), 7.54 – 7.50 (m, 1H), 7.45 (dd,  $J$  = 8.3, 6.8 Hz, 2H), 7.39 – 7.35 (m, 2H), 7.34 – 7.27 (m, 3H), 5.40 (dd,  $J$  = 10.2, 8.2 Hz, 1H), 4.80 (dd,  $J$  = 10.1, 8.3 Hz, 1H), 4.29 (t,  $J$  = 8.3 Hz, 1H).

<sup>13</sup>C NMR (126 MHz, CDCl<sub>3</sub>)  $\delta$  164.9, 142.5, 131.7, 128.9, 128.6, 128.5, 127.8, 127.7, 126.9, 75.0, 70.2.

HRMS (ESI)  $m/z$  calcd for C<sub>15</sub>H<sub>14</sub>NO<sup>+</sup> [(M+H)<sup>+</sup>] 224.1070, found 224.1067.

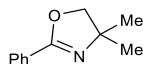

**4,4-dimethyl-2-phenyl-4,5-dihydrooxazole (23):** This compound was prepared according to the General Procedure A, using N-(1-hydroxy-2-methylpropan-2-yl)benzamide (38.6 mg, 0.2 mmol), trifluoromethanesulfonic acid (45.0 mg, 27 $\mu$ L, 0.3 mmol). After purification by column chromatography (SiO<sub>2</sub>, 20% EtOAc in PE to 40% EtOAc in PE), the title compound was isolated as a colorless oil (20.1 mg, 57% yield).

<sup>1</sup>H NMR (500 MHz, CDCl<sub>3</sub>)  $\delta$  7.99 – 7.90 (m, 2H), 7.49 – 7.43 (m, 1H), 7.43 – 7.36 (m, 2H), 4.10 (s, 2H), 1.38 (s, 6H).

<sup>13</sup>C NMR (126 MHz, CDCl<sub>3</sub>)  $\delta$  162.3, 131.3, 128.4, 128.4, 128.1, 79.3, 67.7, 28.5.

HRMS (ESI)  $m/z$  calcd for C<sub>11</sub>H<sub>14</sub>NO<sup>+</sup> [(M+H)<sup>+</sup>] 176.1070, found 176.1068.

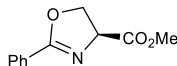

**methyl (S)-2-phenyl-4,5-dihydrooxazole-4-carboxylate (24):** This compound was prepared according to the General Procedure A, using methyl benzoyl-L-serinate (44.6 mg, 0.2 mmol), trifluoromethanesulfonic acid (45.0 mg, 27 $\mu$ L, 0.3 mmol). After purification by column chromatography (SiO<sub>2</sub>, 20% EtOAc in PE to 40% EtOAc in PE), the title compound was isolated as a yellow oil (24.0 mg, 59% yield).

<sup>1</sup>H NMR (500 MHz, CDCl<sub>3</sub>)  $\delta$  8.03 – 7.93 (m, 2H), 7.55 – 7.46 (m, 1H), 7.45 – 7.37 (m, 2H), 4.95 (dd,  $J$  = 10.6, 8.0 Hz, 1H), 4.69 (dd,  $J$  = 8.7, 8.0 Hz, 1H), 4.59 (dd,  $J$  = 10.6, 8.7 Hz, 1H), 3.81 (s,



3H).

$^{13}\text{C}$  NMR (126 MHz,  $\text{CDCl}_3$ )  $\delta$  171.8, 166.5, 132.0, 128.7, 128.5, 127.0, 69.7, 68.7, 52.9.

HRMS (ESI)  $m/z$  calcd for  $\text{C}_{11}\text{H}_{12}\text{NO}_3^+$  [(M+H) $^+$ ] 206.0812, found 206.0810.

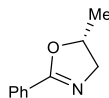

**(S)-5-methyl-2-phenyl-4,5-dihydrooxazole (25):** This compound was prepared according to the General Procedure A, using (S)-N-(2-hydroxypropyl)benzamide (35.8 mg, 0.2 mmol), trifluoromethanesulfonic acid (45.0 mg, 27  $\mu\text{L}$ , 0.3 mmol). After purification by column chromatography ( $\text{SiO}_2$ , 20% EtOAc in PE to 50% EtOAc in PE), the title compound was isolated as a colorless oil (19.3 mg, 60% yield).

$^1\text{H}$  NMR (500 MHz,  $\text{CDCl}_3$ )  $\delta$  8.01 – 7.87 (m, 2H), 7.50 – 7.43 (m, 1H), 7.43 – 7.36 (m, 2H), 4.93 – 4.77 (m, 1H), 4.14 (dd,  $J$  = 14.4, 9.4 Hz, 1H), 3.61 (dd,  $J$  = 14.4, 7.4 Hz, 1H), 1.42 (d,  $J$  = 6.3 Hz, 3H).

$^{13}\text{C}$  NMR (126 MHz,  $\text{CDCl}_3$ )  $\delta$  164.1, 131.4, 128.4, 128.2, 128.1, 76.4, 61.6, 21.3.

HRMS (ESI)  $m/z$  calcd for  $\text{C}_{10}\text{H}_{12}\text{NO}^+$  [(M+H) $^+$ ] 162.0913, found 162.0911.

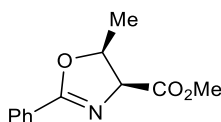

**methyl (4R,5R)-5-methyl-2-phenyl-4,5-dihydrooxazole-4-carboxylate (26):** This compound was prepared according to the General Procedure A, using methyl benzoyl-L-threoninate (47.5 mg, 0.2 mmol), trifluoromethanesulfonic acid (45.0 mg, 27  $\mu\text{L}$ , 0.3 mmol). After purification by column chromatography ( $\text{SiO}_2$ , 20% EtOAc in PE to 40% EtOAc in PE), the title compound was isolated as a colorless oil (19.1 mg, 44% yield).

$^1\text{H}$  NMR (500 MHz,  $\text{CDCl}_3$ )  $\delta$  7.98 (dd,  $J$  = 8.3, 1.4 Hz, 2H), 7.49 (t,  $J$  = 7.4 Hz, 1H), 7.40 (dd,  $J$  = 8.3, 7.0 Hz, 2H), 5.04 – 4.93 (m, 1H), 4.46 (d,  $J$  = 7.4 Hz, 1H), 3.80 (s, 3H), 1.53 (d,  $J$  = 6.3 Hz, 3H).

$^{13}\text{C}$  NMR (126 MHz,  $\text{CDCl}_3$ )  $\delta$  171.7, 165.7, 131.9, 128.7, 128.5, 127.4, 79.0, 75.3, 52.8, 21.1.

HRMS (ESI)  $m/z$  calcd for  $\text{C}_{12}\text{H}_{14}\text{NO}_3^+$  [(M+H) $^+$ ] 220.0968, found 220.0966.

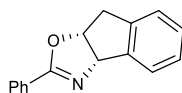

**(3aS,8aR)-2-phenyl-3a,8a-dihydro-8H-indeno[1,2-d]oxazole (27):** This compound was prepared according to the General Procedure A, using N-((1S,2R)-2-hydroxy-2,3-dihydro-1H-inden-1-yl)benzamide (50.7 mg, 0.2 mmol), trifluoromethanesulfonic acid (45.0 mg, 27 $\mu$ L, 0.3 mmol). After purification by column chromatography (SiO<sub>2</sub>, 10% EtOAc in PE to 30% EtOAc in PE), the title compound was isolated as a yellow solid (29.1 mg, 62% yield).

<sup>1</sup>H NMR (500 MHz, CDCl<sub>3</sub>)  $\delta$  8.00 – 7.89 (m, 2H), 7.62 – 7.55 (m, 1H), 7.47 – 7.40 (m, 1H), 7.37 (dd, *J* = 8.3, 6.8 Hz, 2H), 7.31 – 7.24 (m, 3H), 5.74 (d, *J* = 7.9 Hz, 1H), 5.53 – 5.45 (m, 1H), 3.50 (dd, *J* = 17.9, 6.8 Hz, 1H), 3.37 (dd, *J* = 17.9, 1.8 Hz, 1H).

<sup>13</sup>C NMR (126 MHz, CDCl<sub>3</sub>)  $\delta$  164.1, 142.1, 139.9, 131.4, 128.6, 128.5, 128.3, 128.0, 127.6, 125.7, 125.4, 76.9, 39.9.

HRMS (ESI) *m/z* calcd for C<sub>16</sub>H<sub>14</sub>NO<sup>+</sup> [(M+H)<sup>+</sup>] 236.1070, found 236.1067.

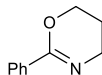

**2-phenyl-5,6-dihydro-4H-1,3-oxazine (28):** This compound was prepared according to the General Procedure A, using N-(3-hydroxypropyl)benzamide (35.8 mg, 0.2 mmol), trifluoromethanesulfonic acid (45.0 mg, 27 $\mu$ L, 0.3 mmol). After purification by column chromatography (SiO<sub>2</sub>, 20% EtOAc in PE to 50% EtOAc in PE), the title compound was isolated as a yellow oil (16.8 mg, 52% yield).

<sup>1</sup>H NMR (500 MHz, CDCl<sub>3</sub>)  $\delta$  7.93 – 7.86 (m, 2H), 7.42 – 7.39 (m, 1H), 7.38 – 7.32 (m, 2H), 4.36 (t, *J* = 5.4 Hz, 2H), 3.60 (t, *J* = 5.9 Hz, 2H), 2.01 – 1.96 (m, 2H).

<sup>13</sup>C NMR (126 MHz, CDCl<sub>3</sub>)  $\delta$  155.8, 134.2, 130.4, 128.1, 127.0, 65.3, 42.8, 22.1.

HRMS (ESI) *m/z* calcd for C<sub>10</sub>H<sub>12</sub>NO<sup>+</sup> [(M+H)<sup>+</sup>] 162.0913, found 162.0912.

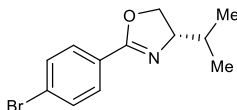

**(S)-2-(4-bromophenyl)-4-isopropyl-4,5-dihydrooxazole (29):** This compound was prepared according to the General Procedure B, using 4-bromobenzoic acid (40.2 mg, 0.2 mmol), N-ethynyl-N,4-dimethylbenzenesulfonamide (46.0 mg, 0.22 mmol), (S)-2-amino-3-methylbutan-1-ol (24.8 mg, 0.24 mmol), trifluoromethanesulfonic acid (45.0 mg, 27 $\mu$ L, 0.3 mmol). After purification by column chromatography (SiO<sub>2</sub>, 5% EtOAc in PE to 20% EtOAc in PE), the title compound was isolated as a white solid (42.6 mg, 80% yield).

$^1\text{H}$  NMR (500 MHz,  $\text{CDCl}_3$ )  $\delta$  7.86 – 7.76 (m, 2H), 7.53 (d,  $J$  = 8.3 Hz, 2H), 4.40 (dd,  $J$  = 9.1, 7.9 Hz, 1H), 4.17 – 4.04 (m, 2H), 1.90 – 1.79 (m, 1H), 1.01 (d,  $J$  = 6.8 Hz, 3H), 0.91 (d,  $J$  = 6.8 Hz, 3H).

$^{13}\text{C}$  NMR (126 MHz,  $\text{CDCl}_3$ )  $\delta$  162.8, 131.7, 129.9, 127.0, 126.0, 72.8, 70.4, 32.9, 19.0, 18.2.

HRMS (ESI)  $m/z$  calcd for  $\text{C}_{12}\text{H}_{15}\text{BrNO}^+$  [(M+H) $^+$ ] 268.0332, found 268.0328.

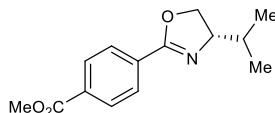

**methyl (S)-4-(4-isopropyl-4,5-dihydrooxazol-2-yl)benzoate (30):** This compound was prepared according to the General Procedure B, using 4-(methoxycarbonyl)benzoic acid (36.0 mg, 0.2 mmol), N-ethynyl-N,4-dimethylbenzenesulfonamide (46.0 mg, 0.22 mmol), (S)-2-amino-3-methylbutan-1-ol (24.8 mg, 0.24 mmol), trifluoromethanesulfonic acid (45.0 mg, 27  $\mu\text{L}$ , 0.3 mmol). After purification by column chromatography ( $\text{SiO}_2$ , 10% EtOAc in PE to 30% EtOAc in PE), the title compound was isolated as a white solid (31.1 mg, 62% yield).

$^1\text{H}$  NMR (500 MHz,  $\text{CDCl}_3$ )  $\delta$  8.05 (d,  $J$  = 8.6 Hz, 2H), 8.00 (d,  $J$  = 8.5 Hz, 2H), 4.46 – 4.38 (m, 1H), 4.18 – 4.08 (m, 2H), 3.92 (s, 3H), 1.90 – 1.82 (m, 1H), 1.02 (d,  $J$  = 6.7 Hz, 3H), 0.92 (d,  $J$  = 6.8 Hz, 3H).

$^{13}\text{C}$  NMR (126 MHz,  $\text{CDCl}_3$ )  $\delta$  166.6, 162.7, 132.4, 132.1, 129.6, 128.3, 127.4, 72.9, 70.5, 52.4, 32.9, 19.0, 18.2.

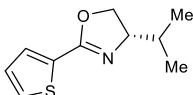

**(S)-4-isopropyl-2-(thiophen-2-yl)-4,5-dihydrooxazole (31):** This compound was prepared according to the General Procedure B, using thiophene-2-carboxylic acid (25.6 mg, 0.2 mmol), N-ethynyl-N,4-dimethylbenzenesulfonamide (46.0 mg, 0.22 mmol), (S)-2-amino-3-methylbutan-1-ol (24.8 mg, 0.24 mmol), trifluoromethanesulfonic acid (45.0 mg, 27  $\mu\text{L}$ , 0.3 mmol). After purification by column chromatography ( $\text{SiO}_2$ , 10% EtOAc in PE to 30% EtOAc in PE), the title compound was isolated as a colorless oil (29.1mg, 75% yield).

$^1\text{H}$  NMR (500 MHz,  $\text{CDCl}_3$ )  $\delta$  7.59 (dd,  $J$  = 3.7, 1.2 Hz, 1H), 7.42 (dd,  $J$  = 5.0, 1.3 Hz, 1H), 7.06 (dd,  $J$  = 5.0, 3.7 Hz, 1H), 4.38 (dd,  $J$  = 9.0, 7.6 Hz, 1H), 4.16 – 4.05 (m, 2H), 1.92 – 1.81 (m, 1H), 1.01 (d,  $J$  = 6.7 Hz, 3H), 0.91 (d,  $J$  = 6.8 Hz, 3H).

$^{13}\text{C}$  NMR (126 MHz,  $\text{CDCl}_3$ )  $\delta$  159.2, 130.6, 130.3, 129.7, 127.7, 72.8, 70.5, 32.8, 19.1, 18.1.

HRMS (ESI)  $m/z$  calcd for  $C_{10}H_{14}NOS^+$   $[(M+H)^+]$  196.0791, found 196.0789.

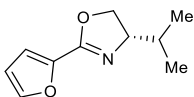

**(S)-2-(furan-2-yl)-4-isopropyl-4,5-dihydrooxazole (32):** This compound was prepared according to the General Procedure B, using furan-2-carboxylic acid (22.4 mg, 0.2 mmol), N-ethynyl-N,4-dimethylbenzenesulfonamide (46.0 mg, 0.22 mmol), (S)-2-amino-3-methylbutan-1-ol (24.8 mg, 0.24 mmol), trifluoromethanesulfonic acid (45.0 mg, 27  $\mu$ L, 0.3 mmol). After purification by column chromatography ( $SiO_2$ , 10% EtOAc in PE to 30% EtOAc in PE), the title compound was isolated as a yellow oil (24.1 mg, 67% yield).

$^1H$  NMR (500 MHz,  $CDCl_3$ )  $\delta$  7.51 (dd,  $J = 1.9, 0.8$  Hz, 1H), 6.92 (dd,  $J = 3.5, 0.8$  Hz, 1H), 6.46 (dd,  $J = 3.5, 1.8$  Hz, 1H), 4.43 – 4.33 (m, 1H), 4.11 – 4.05 (m, 2H), 1.89 – 1.79 (m, 1H), 1.01 (d,  $J = 6.8$  Hz, 3H), 0.91 (d,  $J = 6.8$  Hz, 3H).

$^{13}C$  NMR (126 MHz,  $CDCl_3$ )  $\delta$  155.9, 145.2, 143.1, 114.3, 111.6, 72.8, 70.4, 32.8, 19.1, 18.3.

HRMS (ESI)  $m/z$  calcd for  $C_{10}H_{14}NO_2^+$   $[(M+H)^+]$  180.1019, found 180.1017.

## NMR Data

2, <sup>1</sup>H NMR (500 MHz, CDCl<sub>3</sub>)

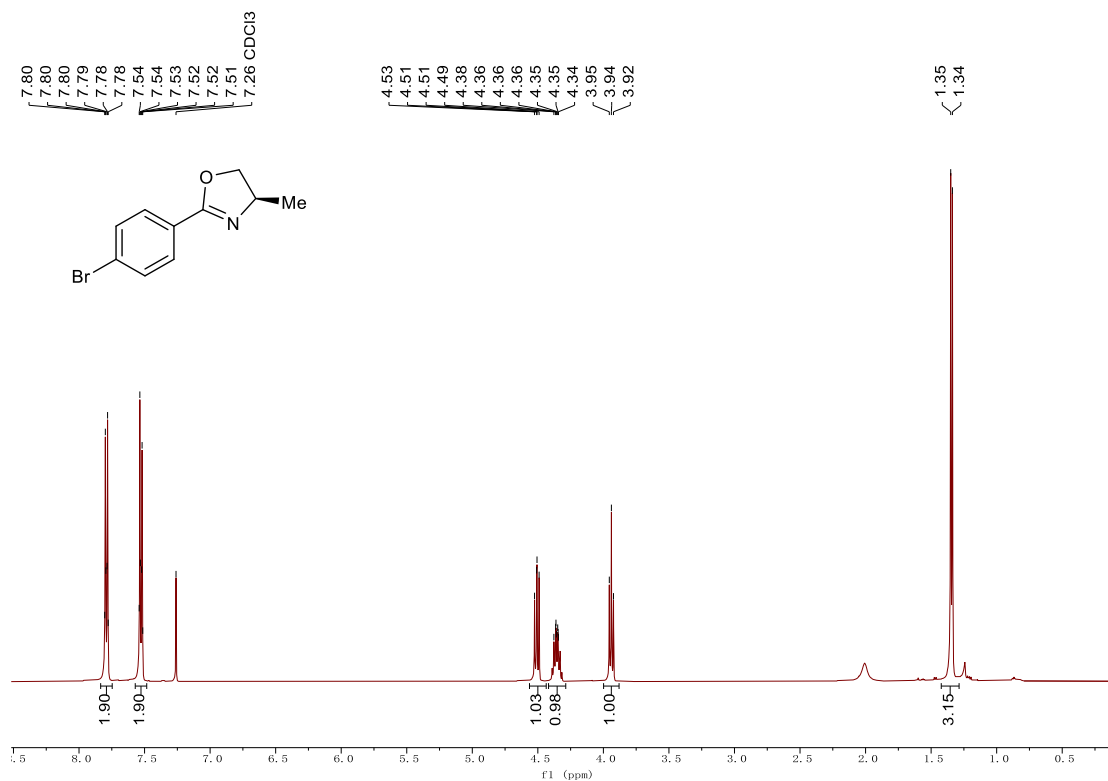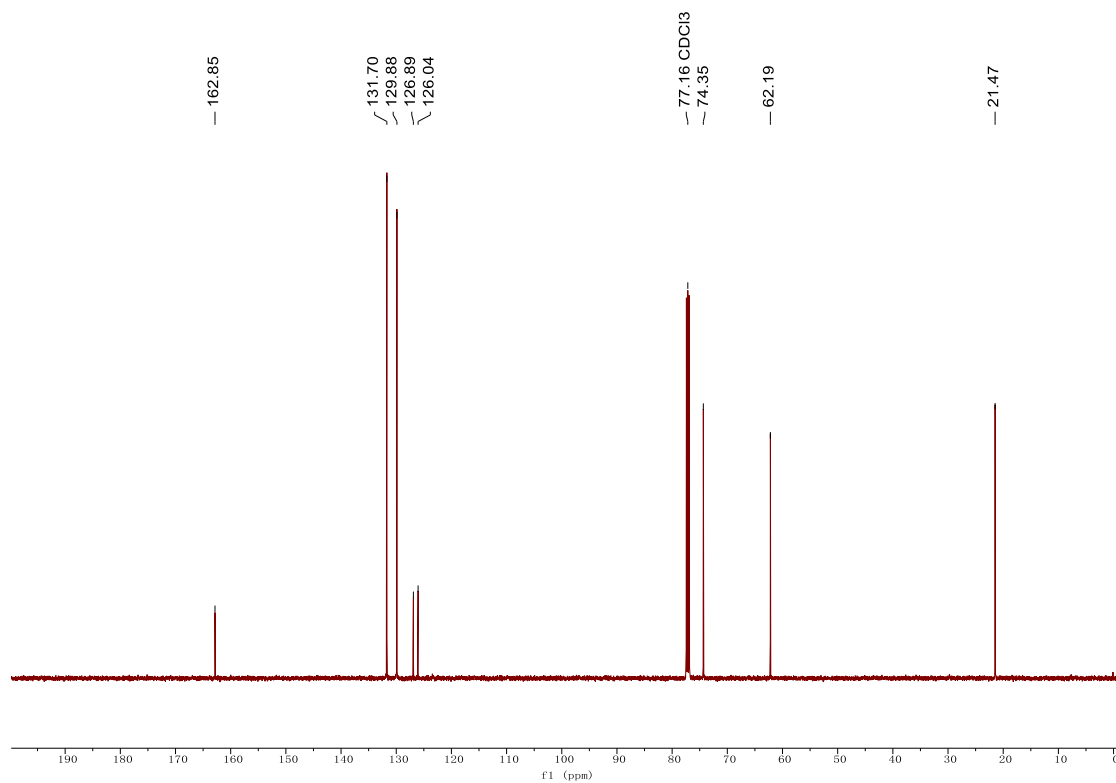

**3,  $^1\text{H}$  NMR (500 MHz,  $\text{CDCl}_3$ )**

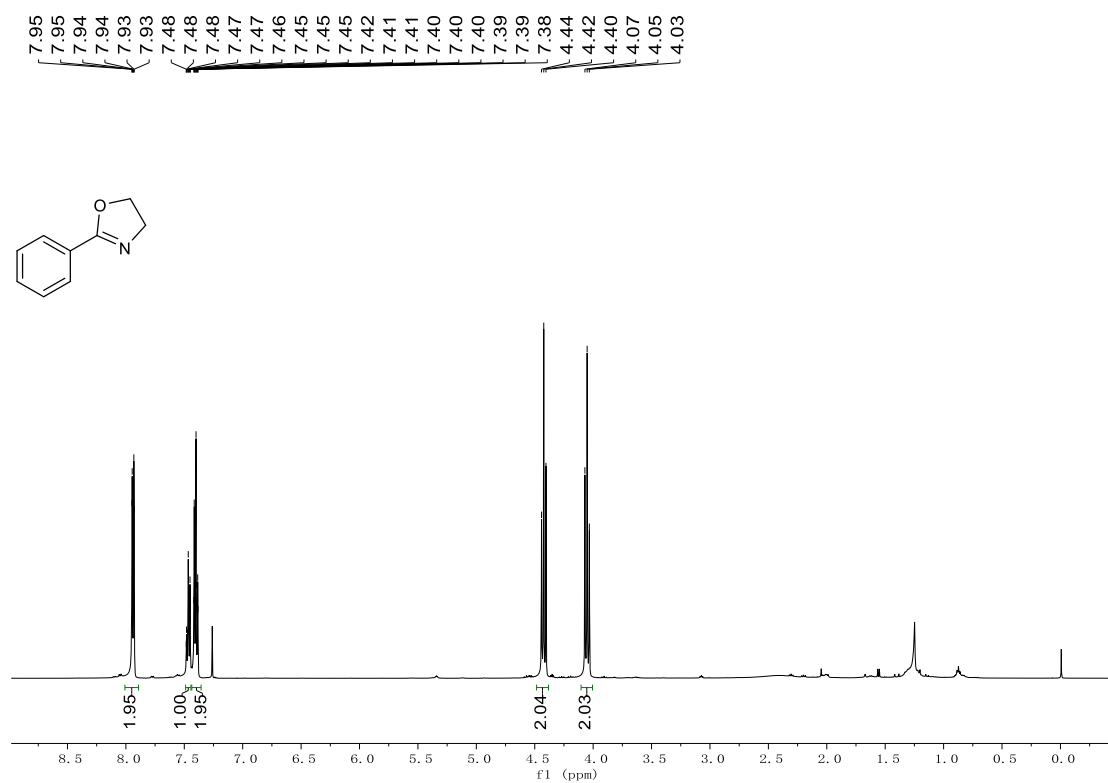

**3,  $^{13}\text{C}$  NMR (126 MHz,  $\text{CDCl}_3$ )**

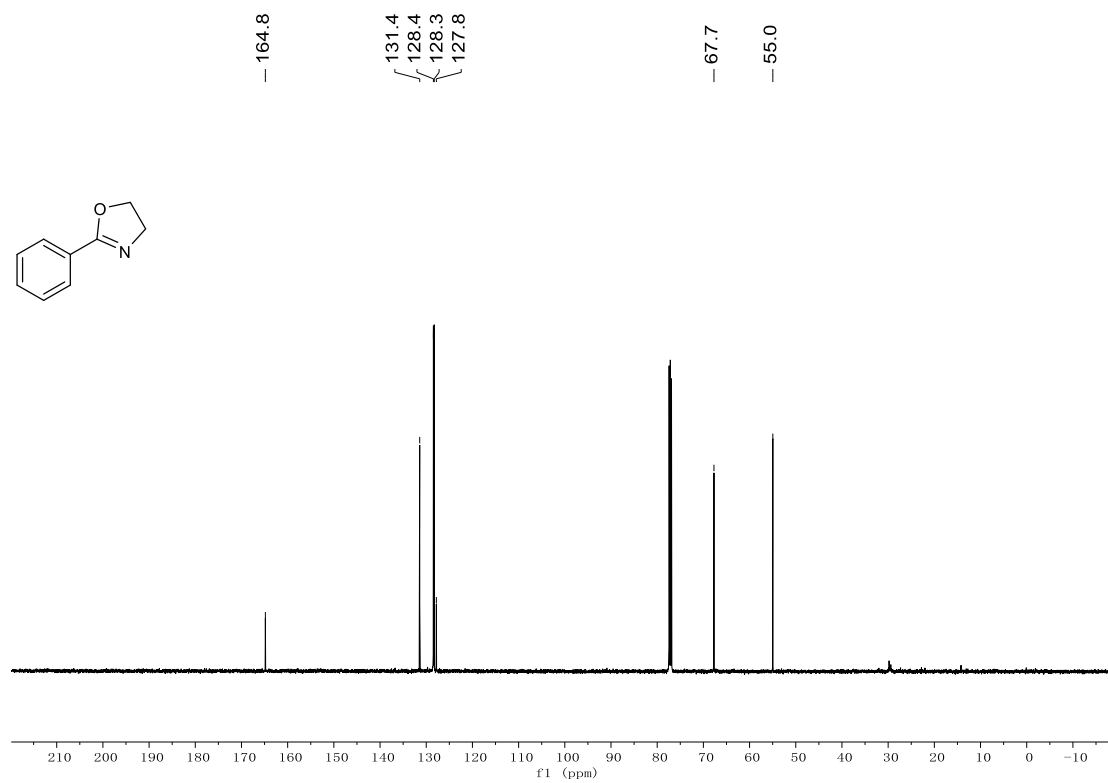

**4,  $^1\text{H}$  NMR (500 MHz,  $\text{CDCl}_3$ )**

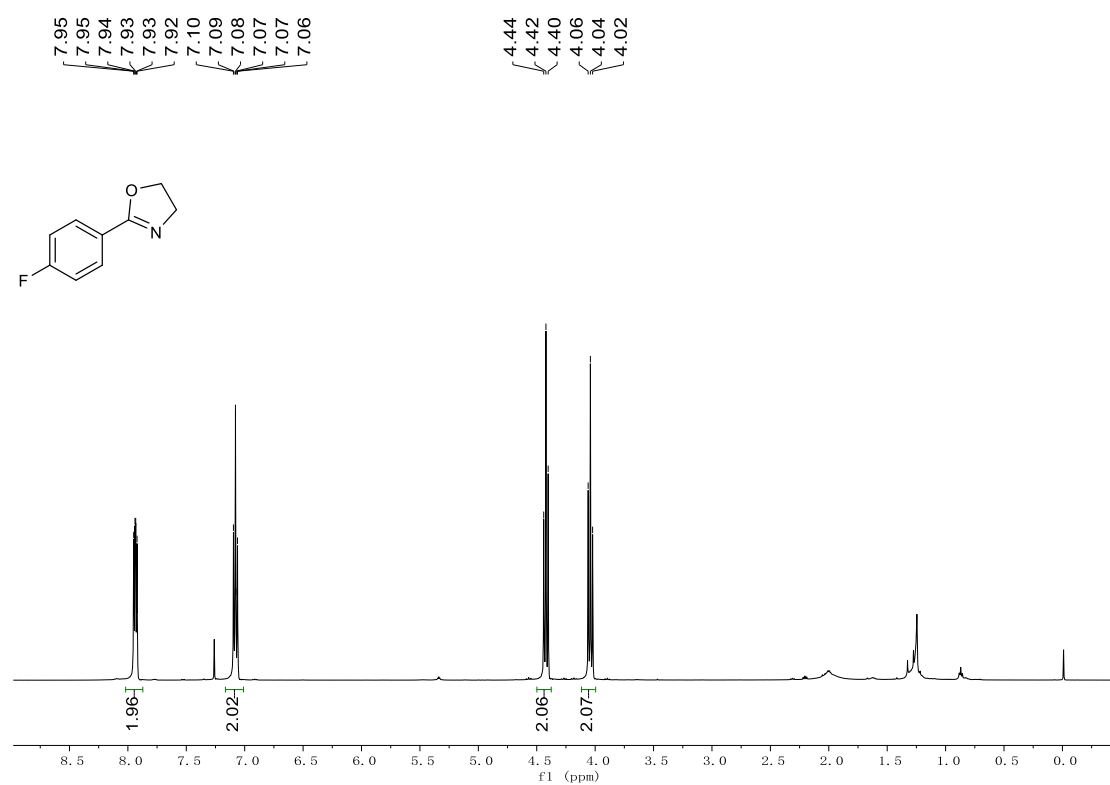

**4,  $^{13}\text{C}$  NMR (126 MHz,  $\text{CDCl}_3$ )**

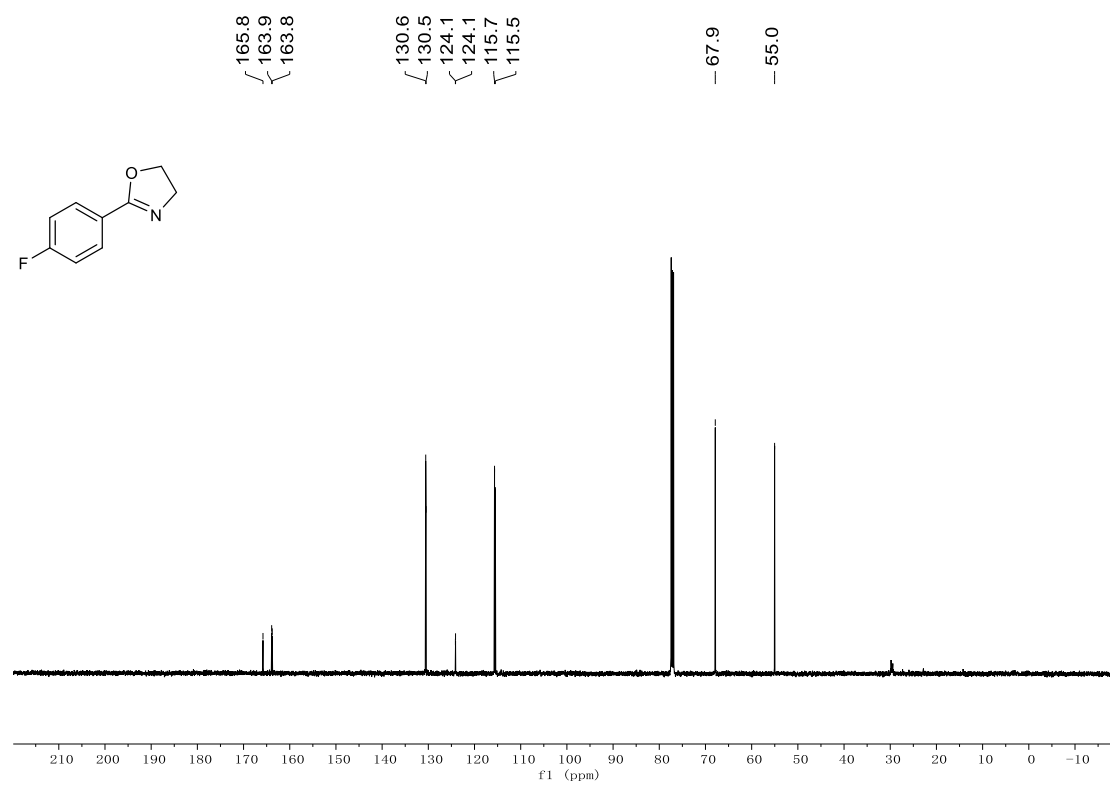

**4**,  $^{19}\text{F}$  NMR (471 MHz,  $\text{CDCl}_3$ )

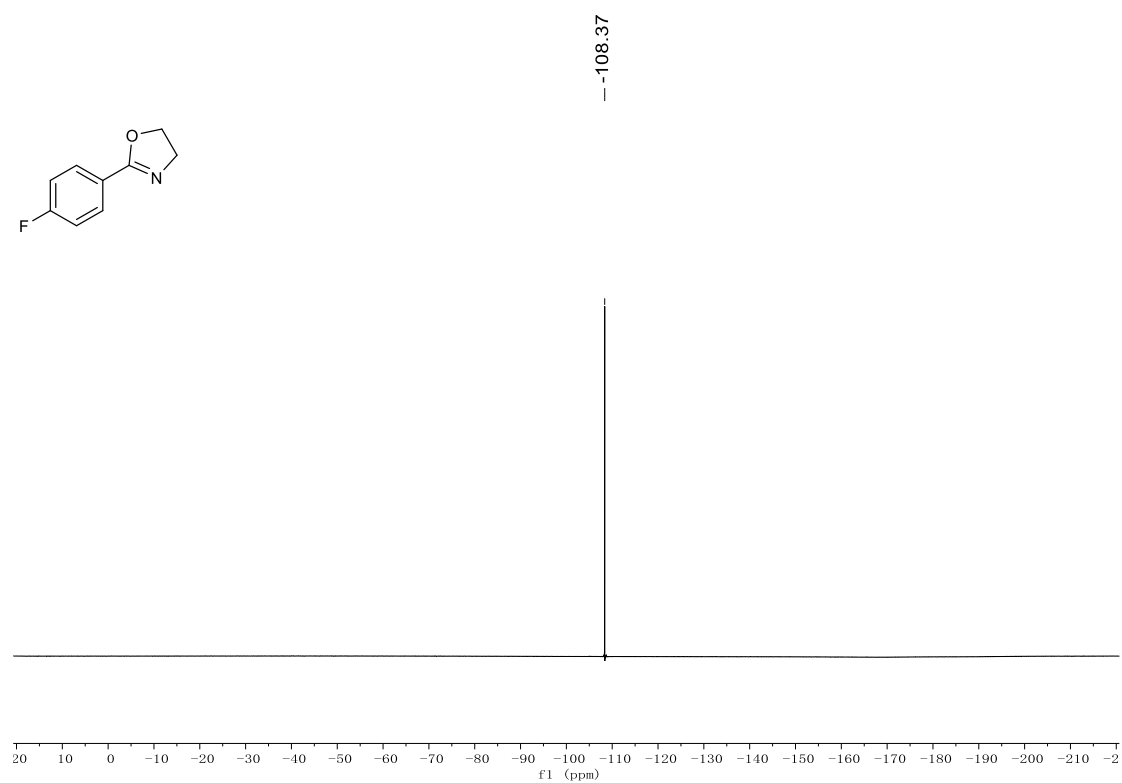

**5**,  $^1\text{H}$  NMR (500 MHz,  $\text{CDCl}_3$ )

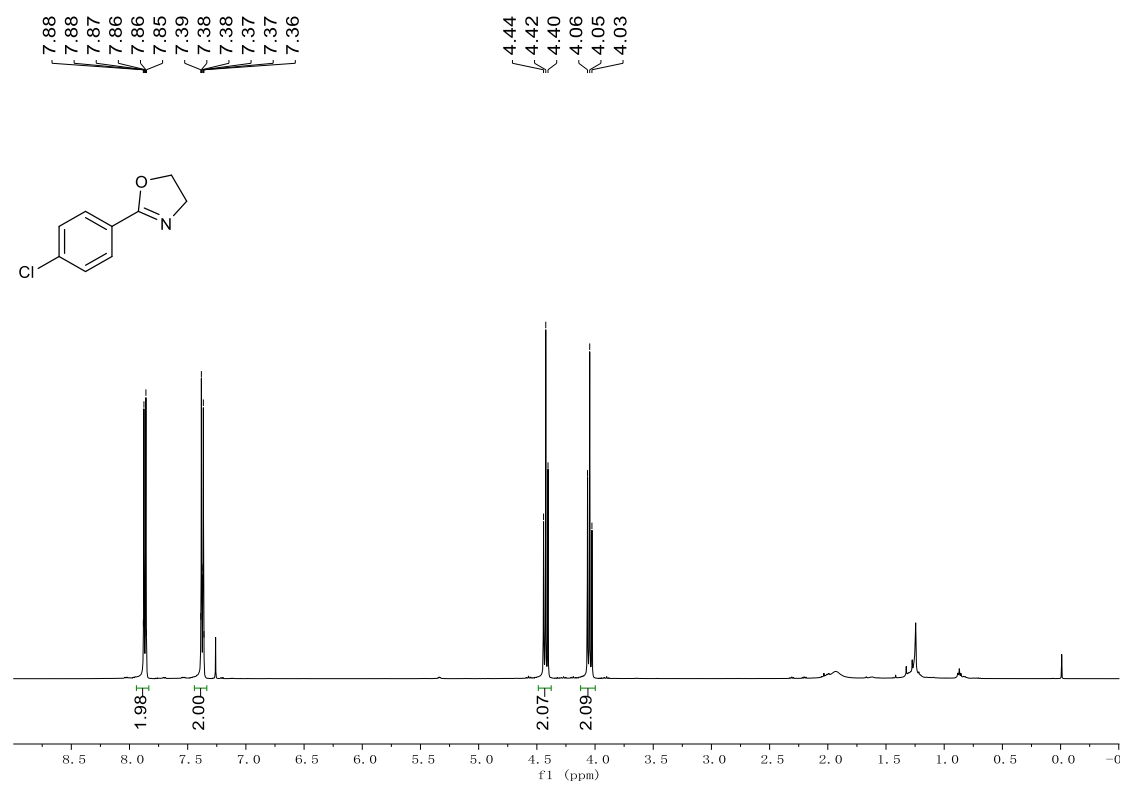



**5**,  $^{13}\text{C}$  NMR (126 MHz,  $\text{CDCl}_3$ )

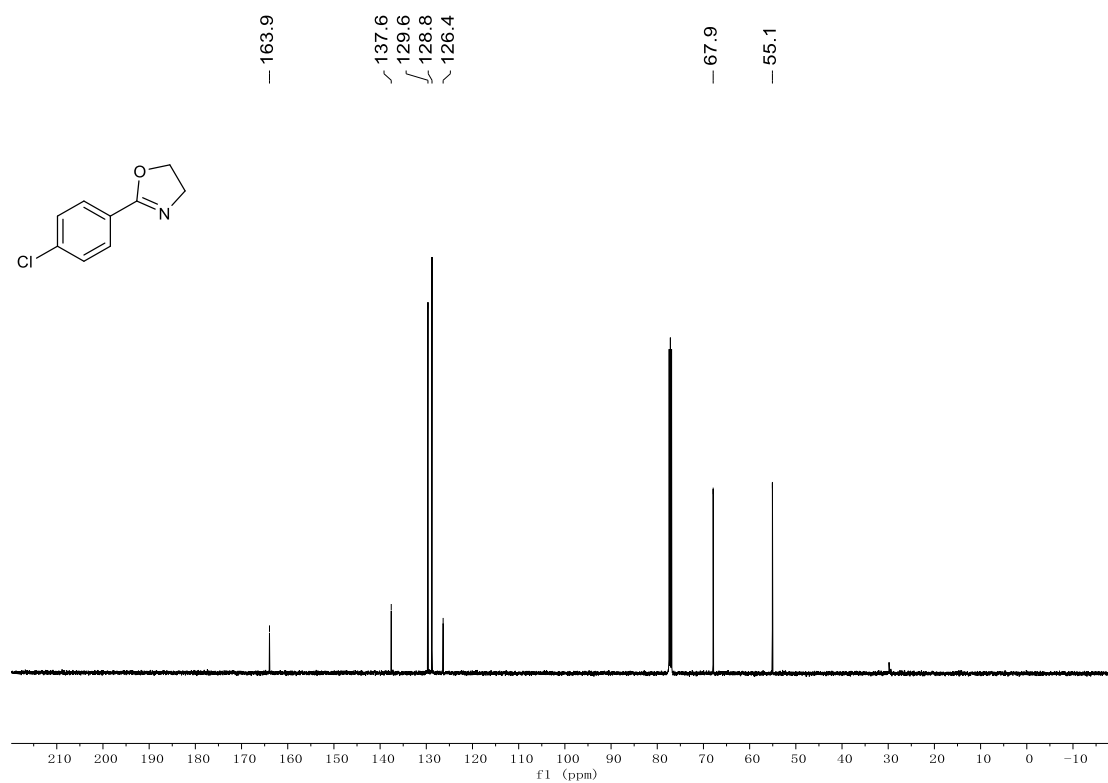

**6**,  $^1\text{H}$  NMR (500 MHz,  $\text{CDCl}_3$ )

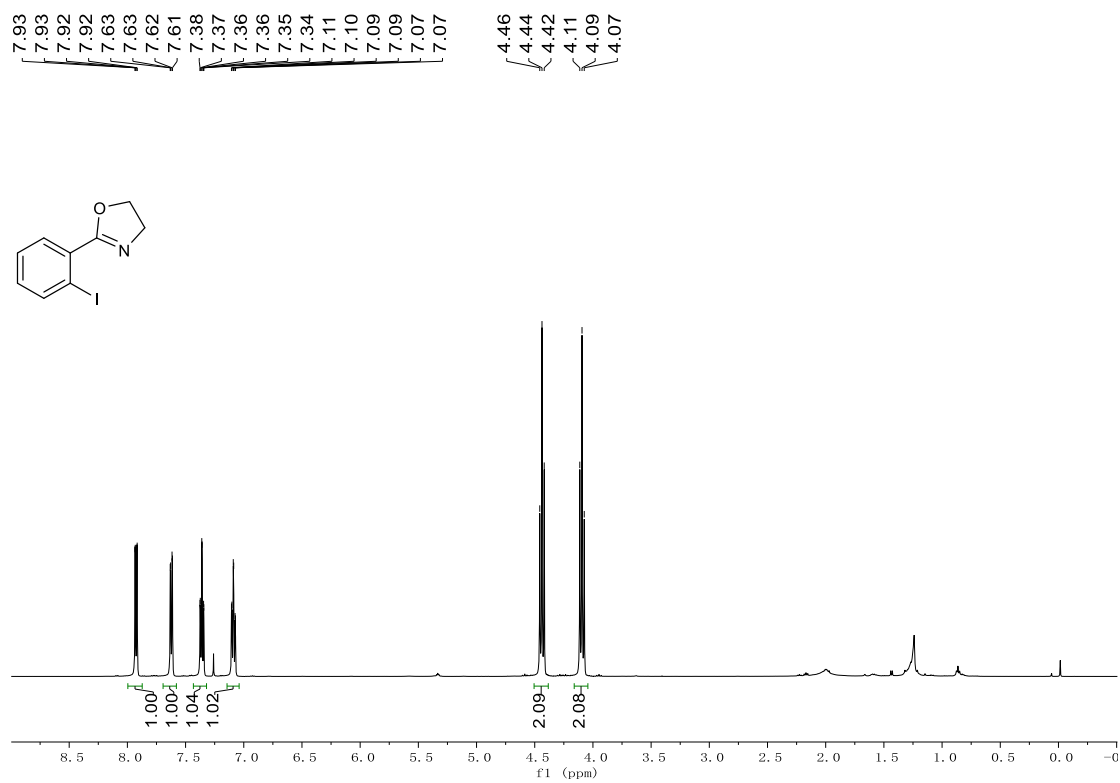

**6,  $^{13}\text{C}$  NMR (126 MHz,  $\text{CDCl}_3$ )**

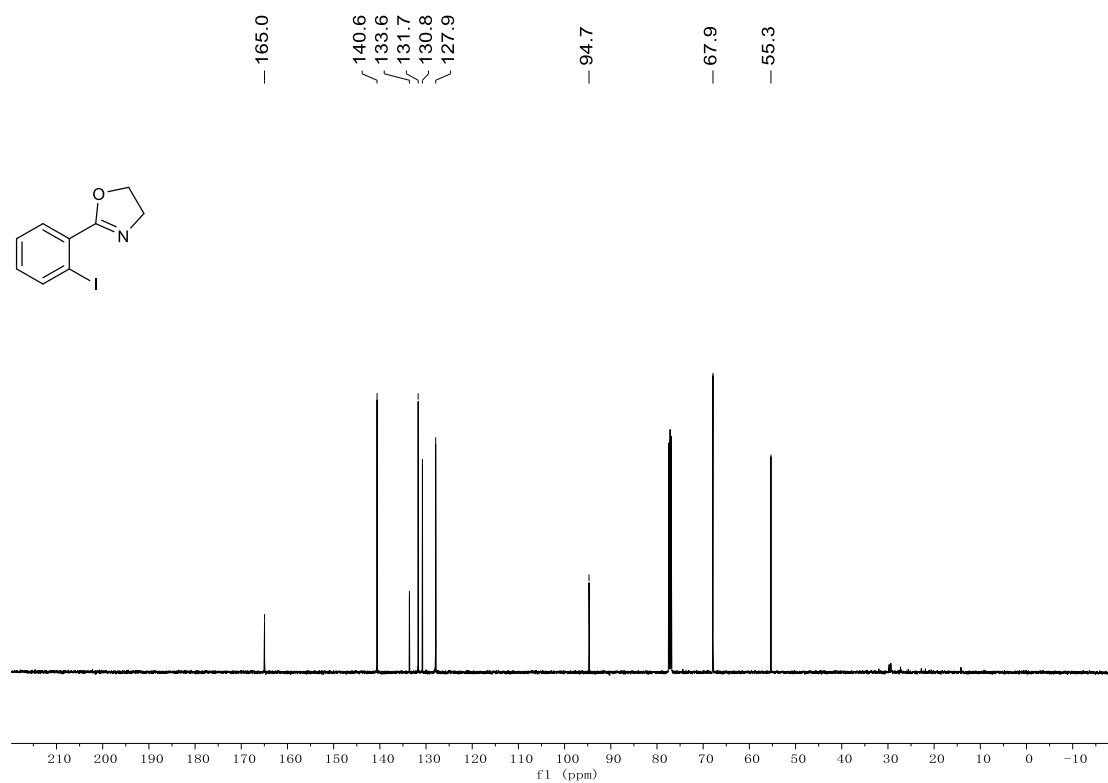

**7,  $^1\text{H}$  NMR (500 MHz,  $\text{CDCl}_3$ )**

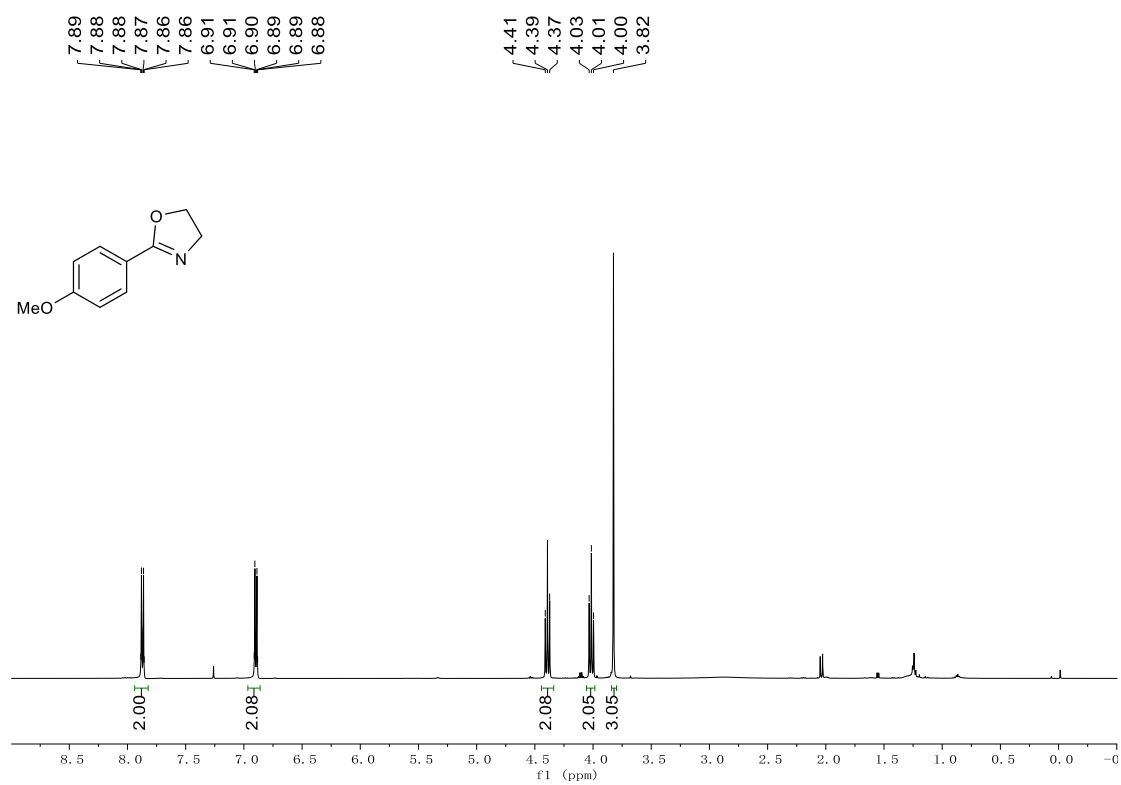

**7**,  $^{13}\text{C}$  NMR (126 MHz,  $\text{CDCl}_3$ )

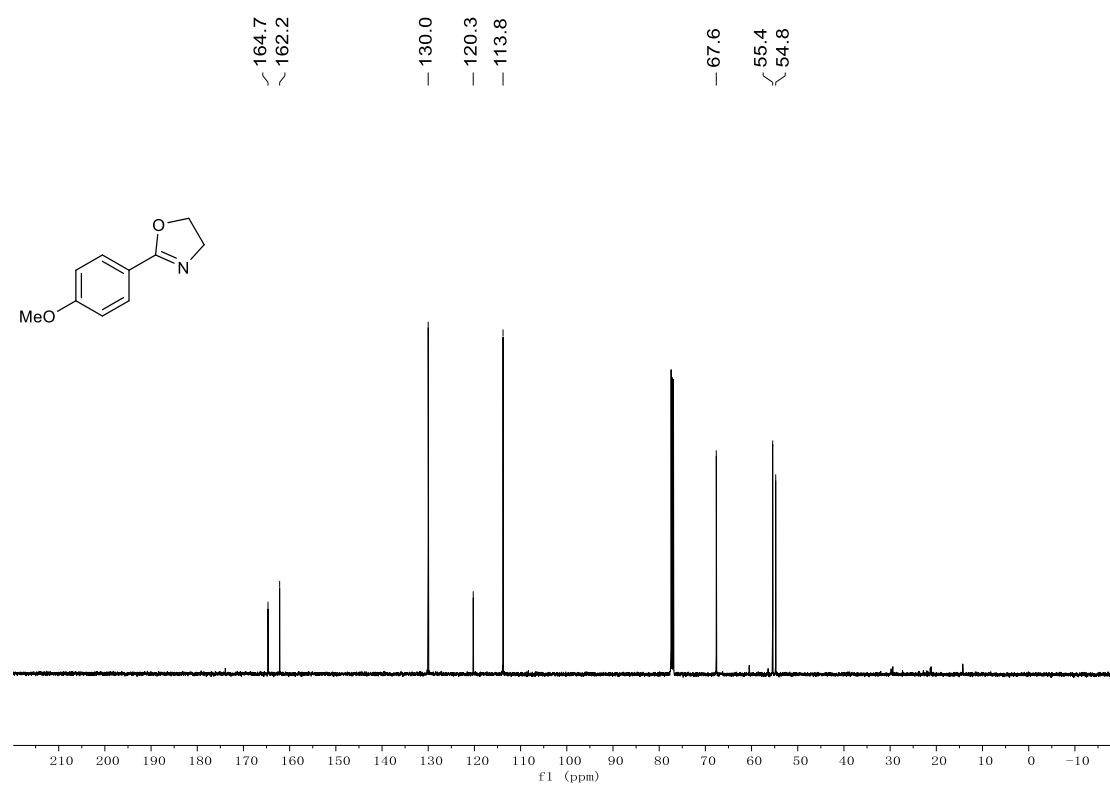

**8**,  $^1\text{H}$  NMR (500 MHz,  $\text{CDCl}_3$ )

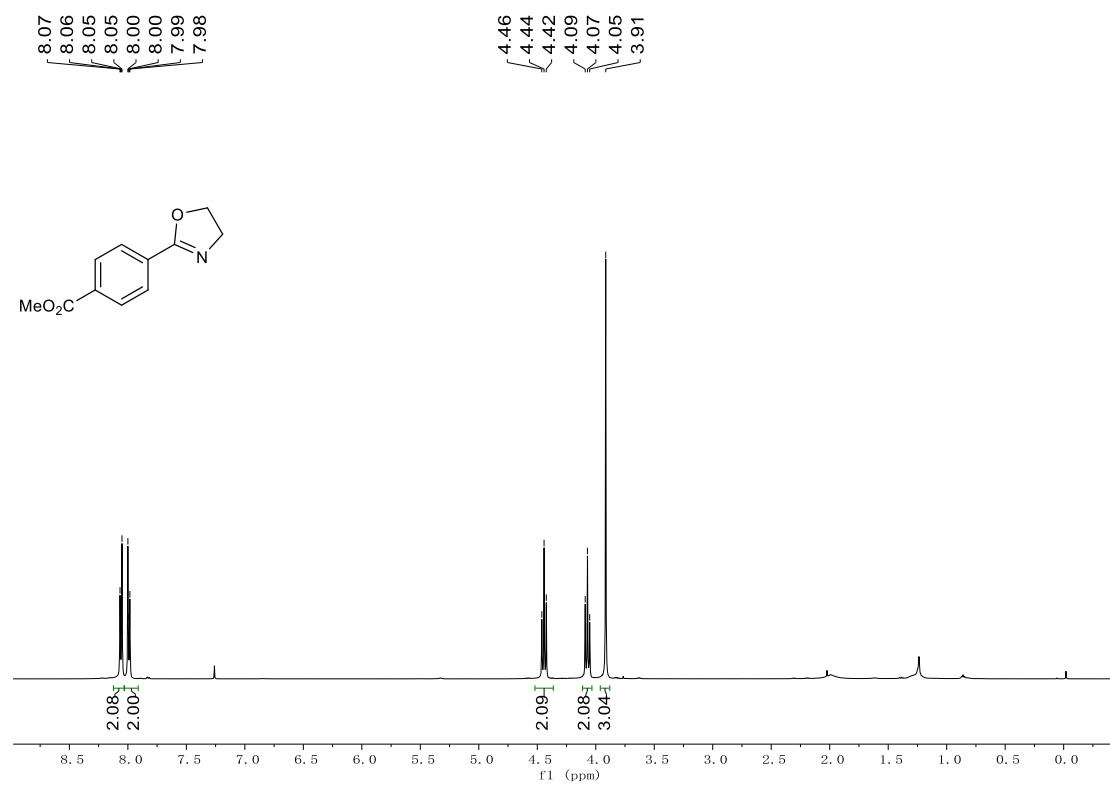

**8,  $^{13}\text{C}$  NMR (126 MHz,  $\text{CDCl}_3$ )**

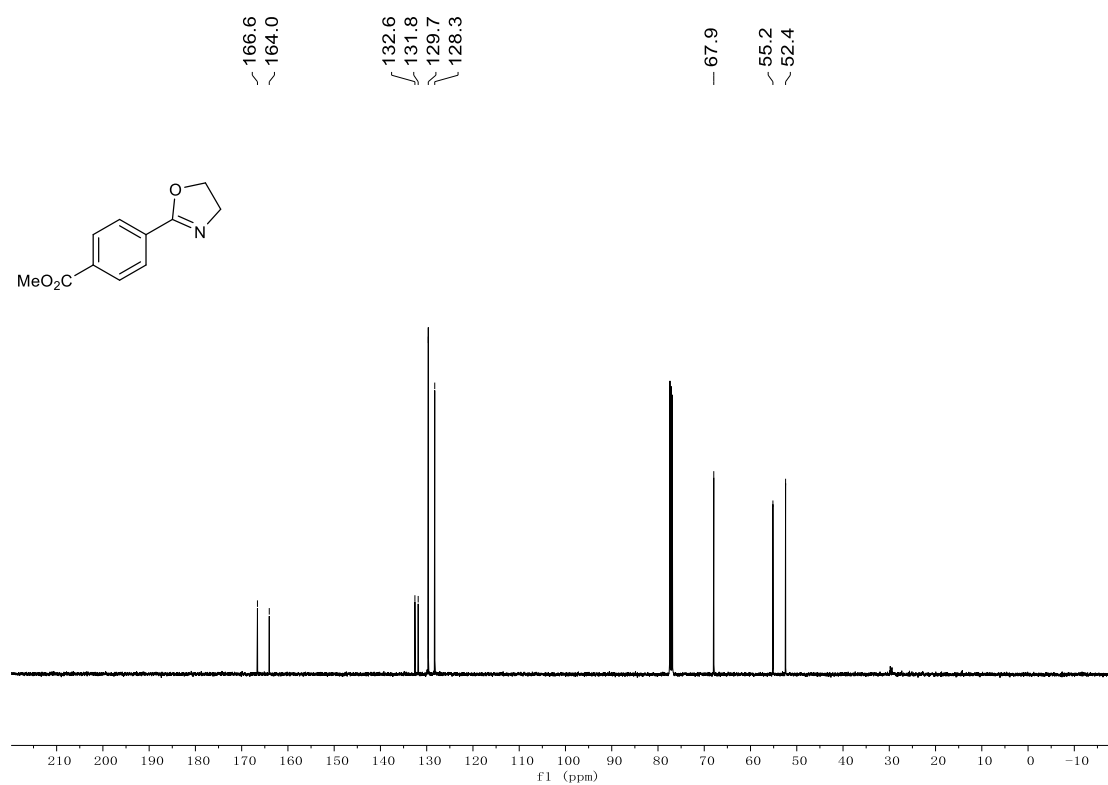

**9,  $^1\text{H}$  NMR (500 MHz,  $\text{CDCl}_3$ )**

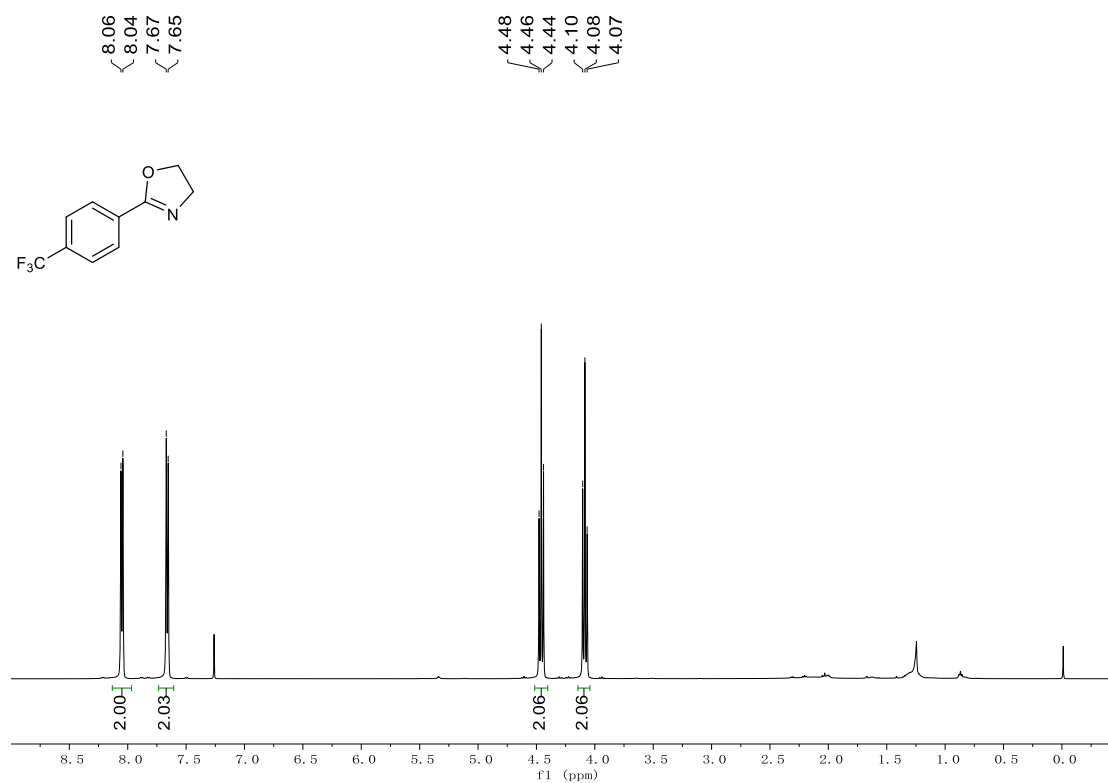

**9,  $^{13}\text{C}$  NMR (126 MHz,  $\text{CDCl}_3$ )**

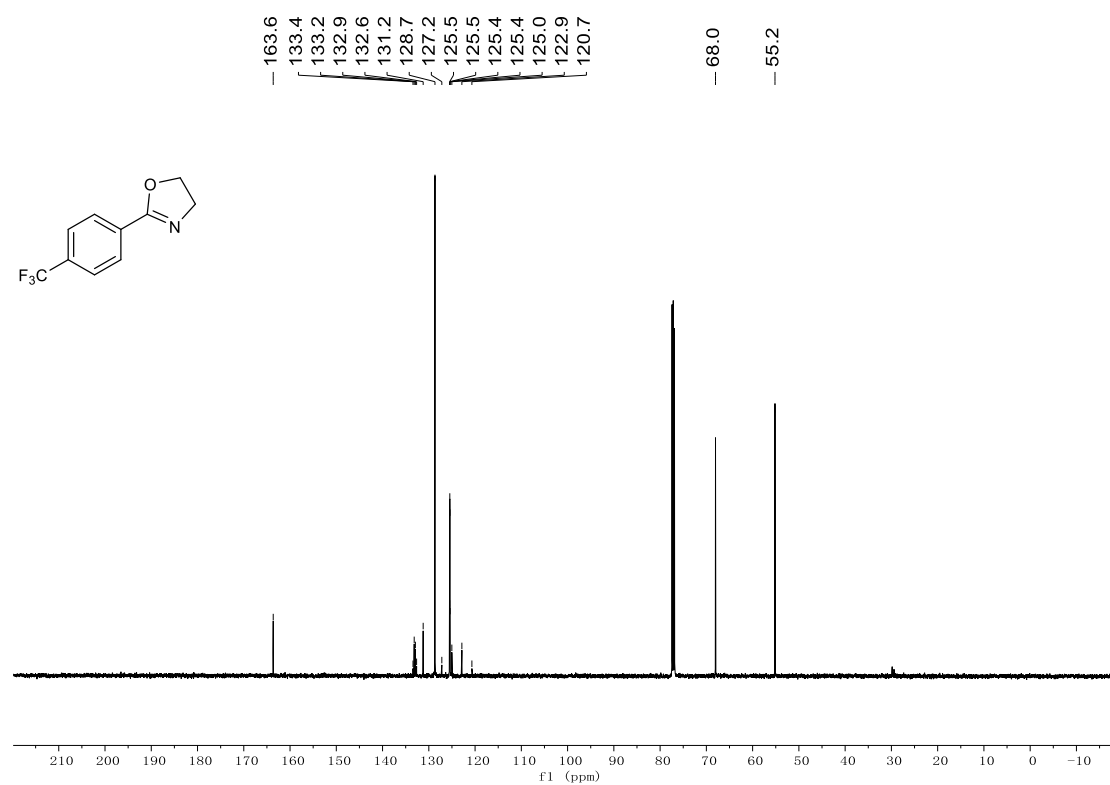

**9,  $^{19}\text{F}$  NMR (471 MHz,  $\text{CDCl}_3$ )**

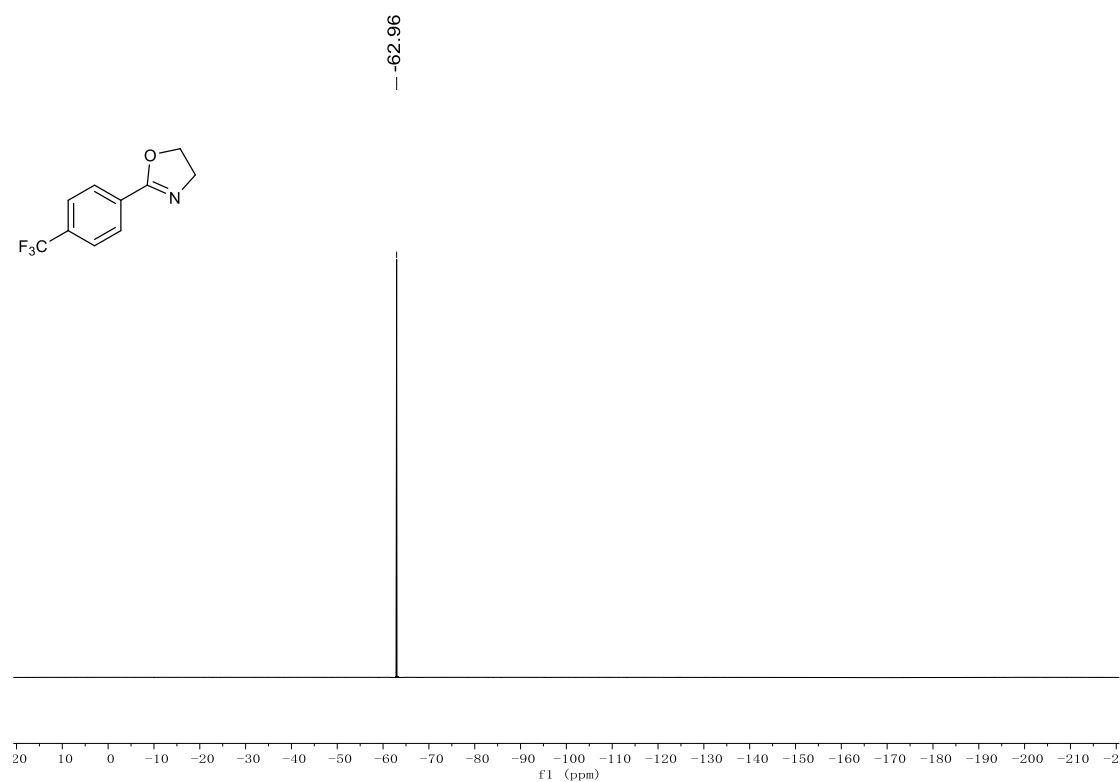

**10**,  $^1\text{H}$  NMR (500 MHz,  $\text{CDCl}_3$ )

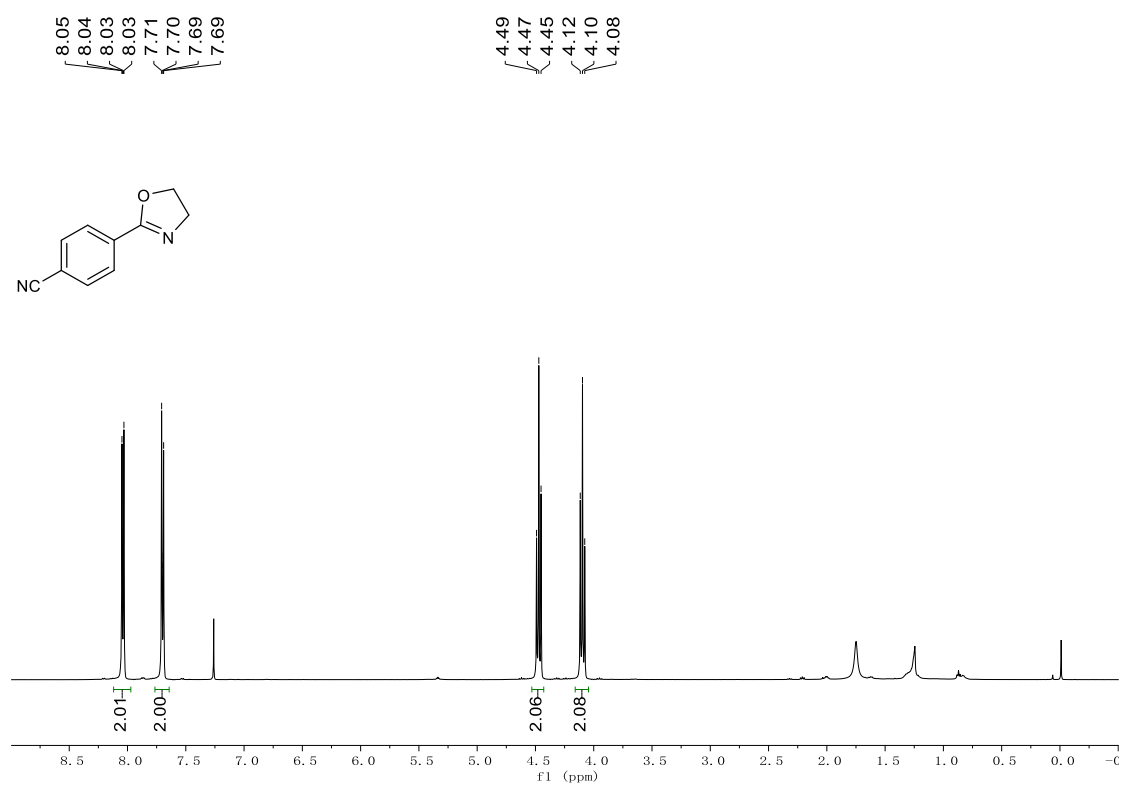

**10**,  $^{13}\text{C}$  NMR (126 MHz,  $\text{CDCl}_3$ )

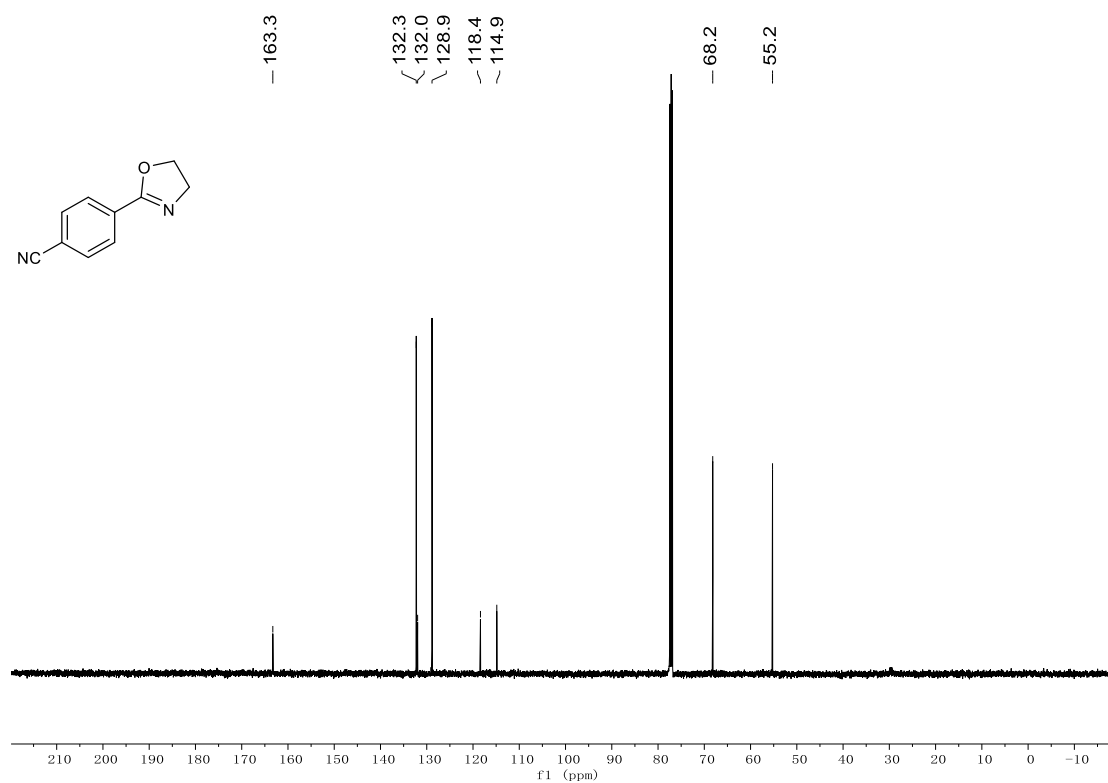

**11**,  $^1\text{H}$  NMR (500 MHz,  $\text{CDCl}_3$ )

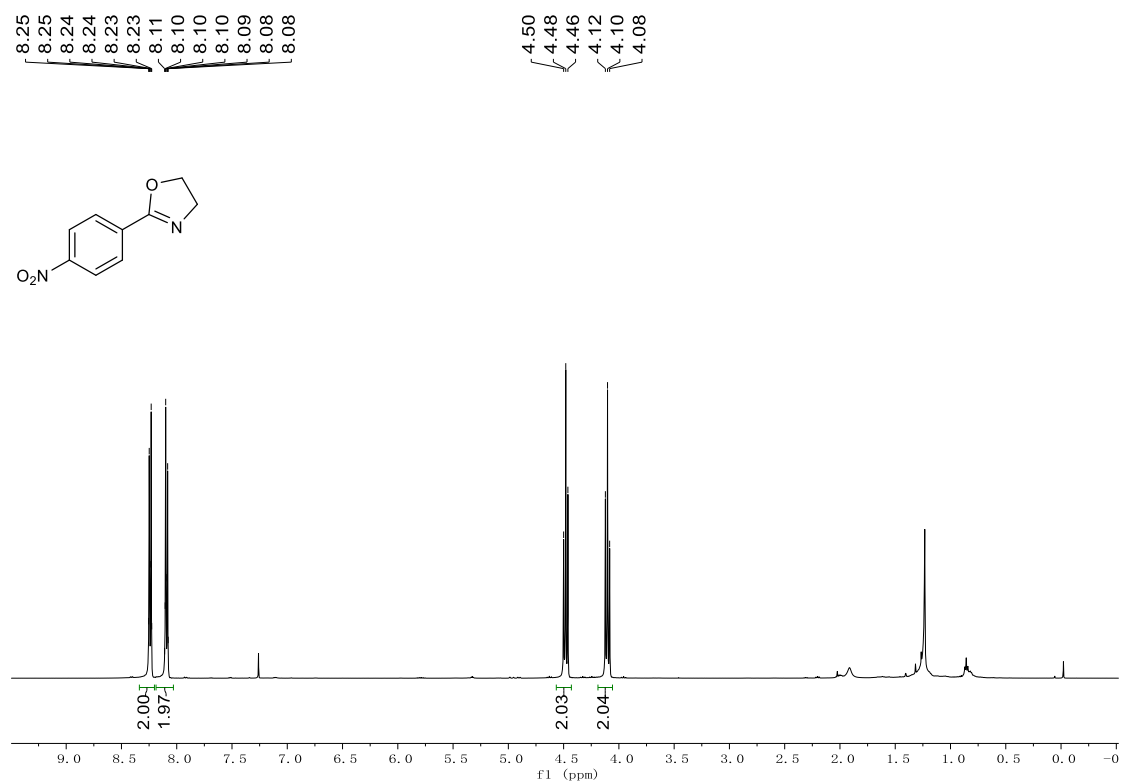

**11**,  $^{13}\text{C}$  NMR (126 MHz,  $\text{CDCl}_3$ )

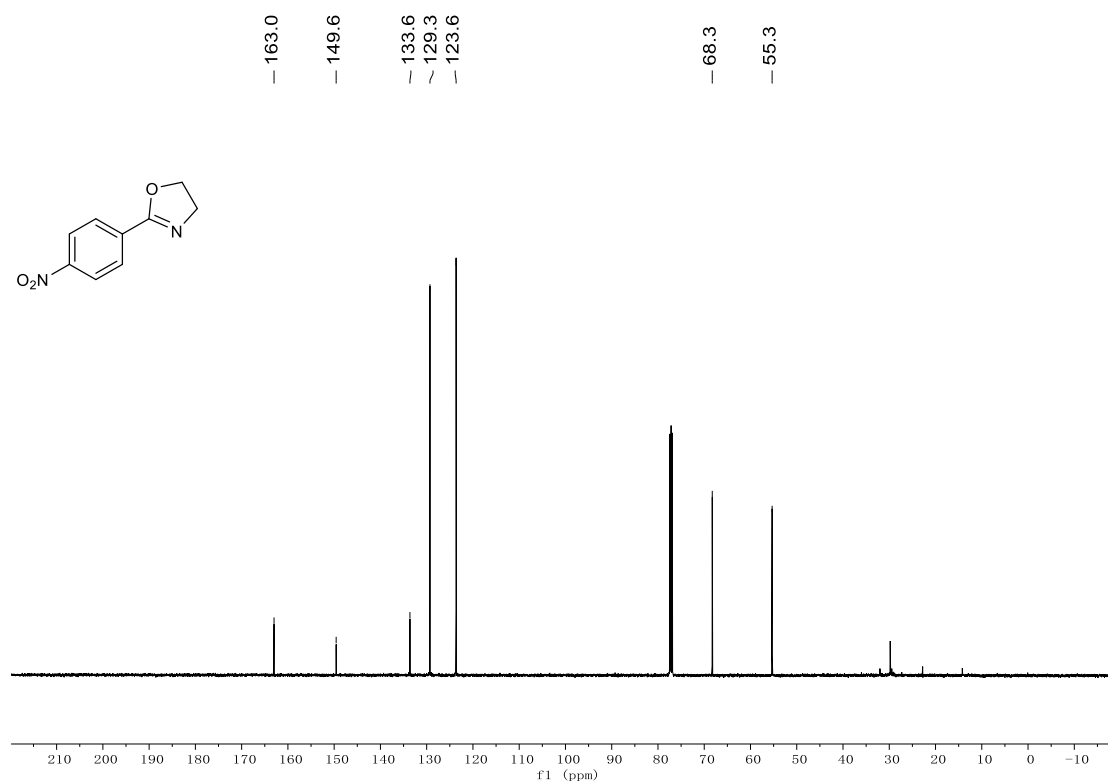

**12,  $^1\text{H}$  NMR (500 MHz,  $\text{CDCl}_3$ )**

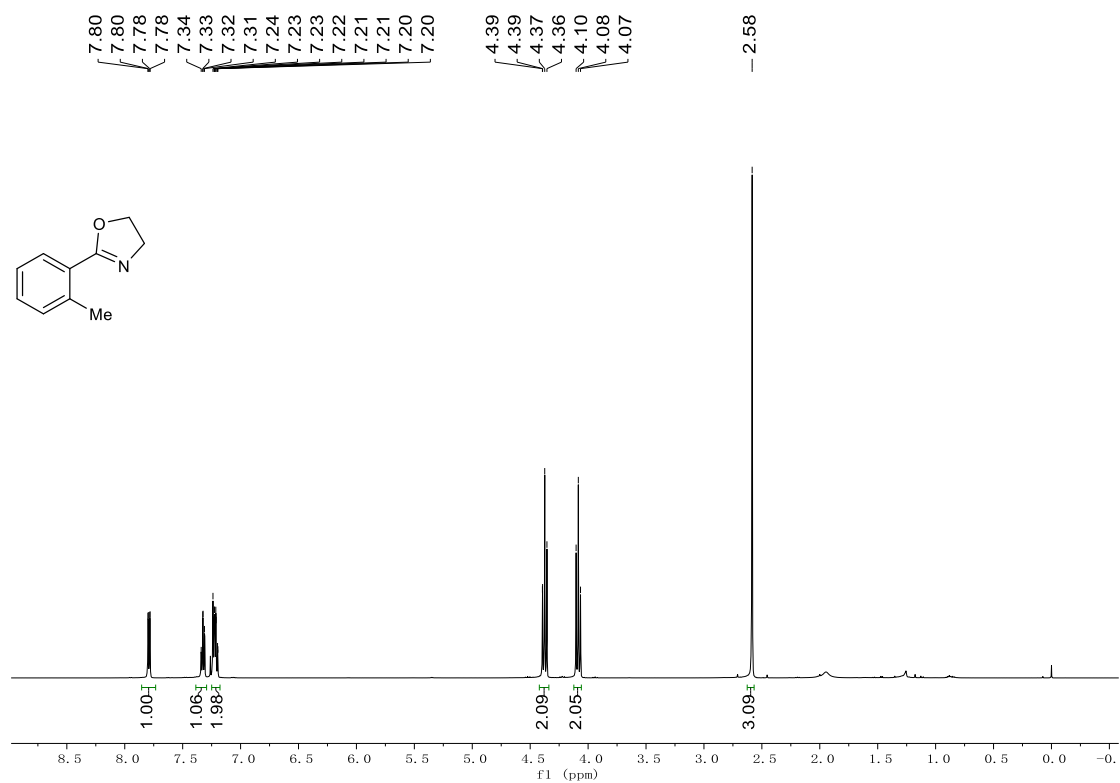

**12,  $^{13}\text{C}$  NMR (126 MHz,  $\text{CDCl}_3$ )**

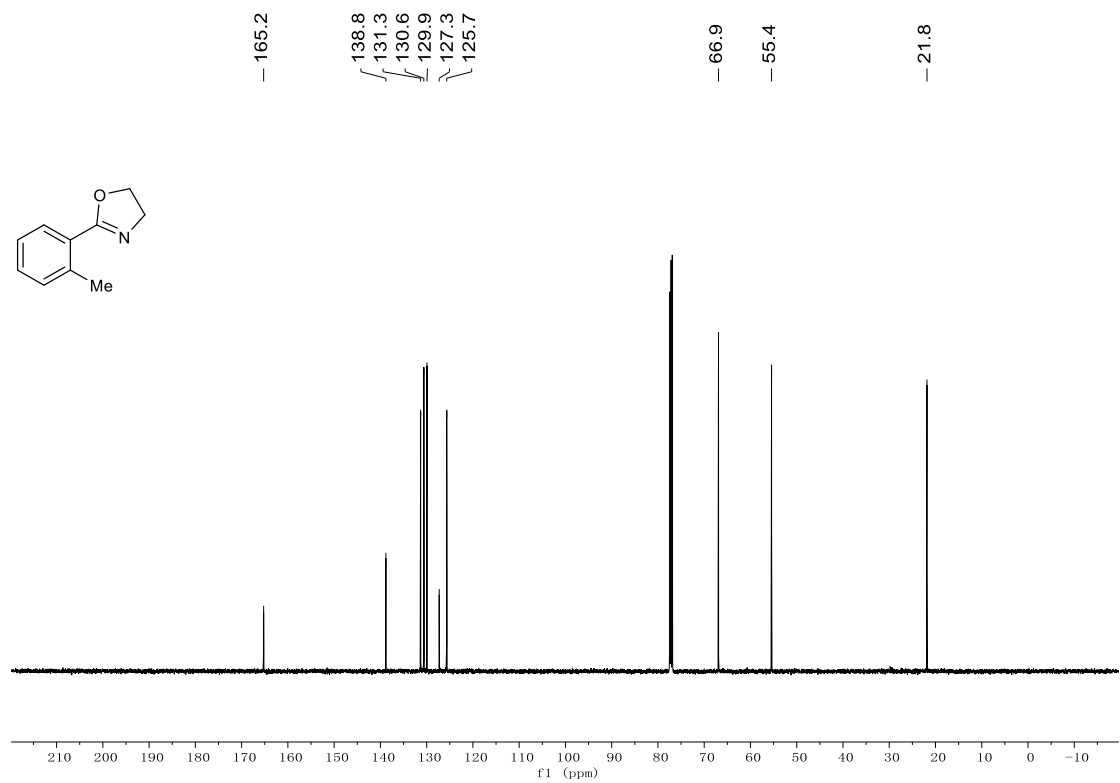



**13**,  $^1\text{H}$  NMR (500 MHz,  $\text{CDCl}_3$ )

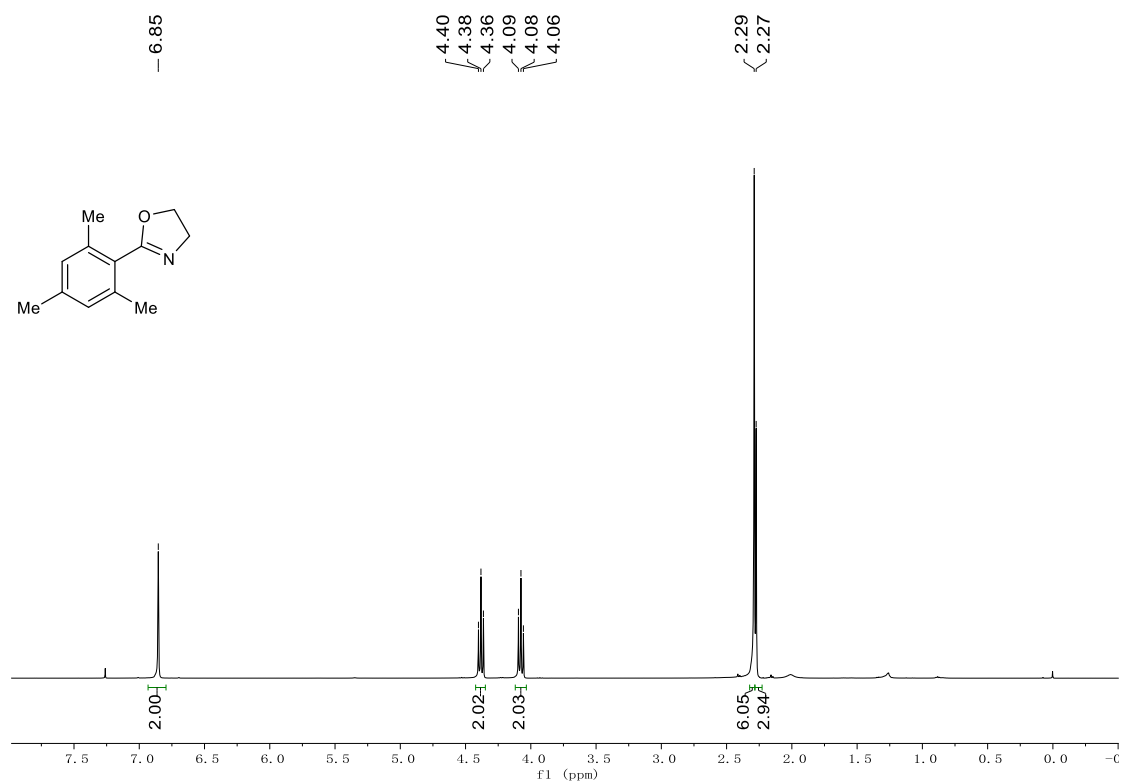

**13**,  $^{13}\text{C}$  NMR (126 MHz,  $\text{CDCl}_3$ )

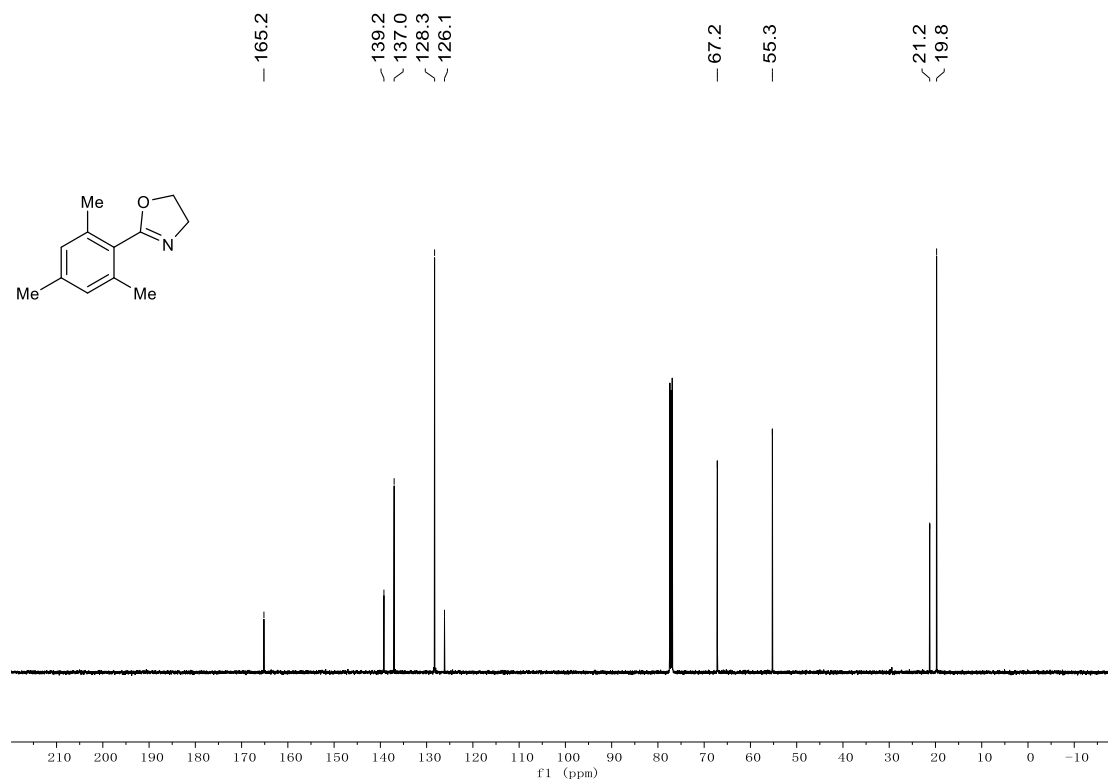

**14**,  $^1\text{H}$  NMR (500 MHz,  $\text{CDCl}_3$ )

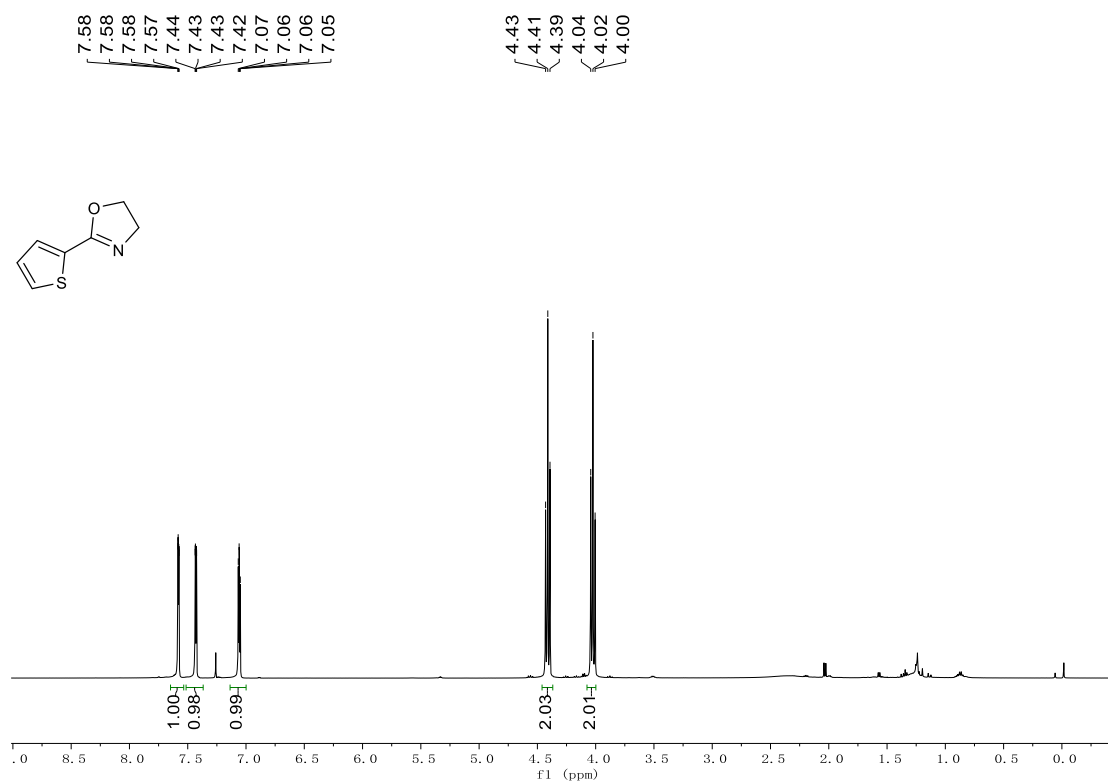

**14**,  $^{13}\text{C}$  NMR (126 MHz,  $\text{CDCl}_3$ )

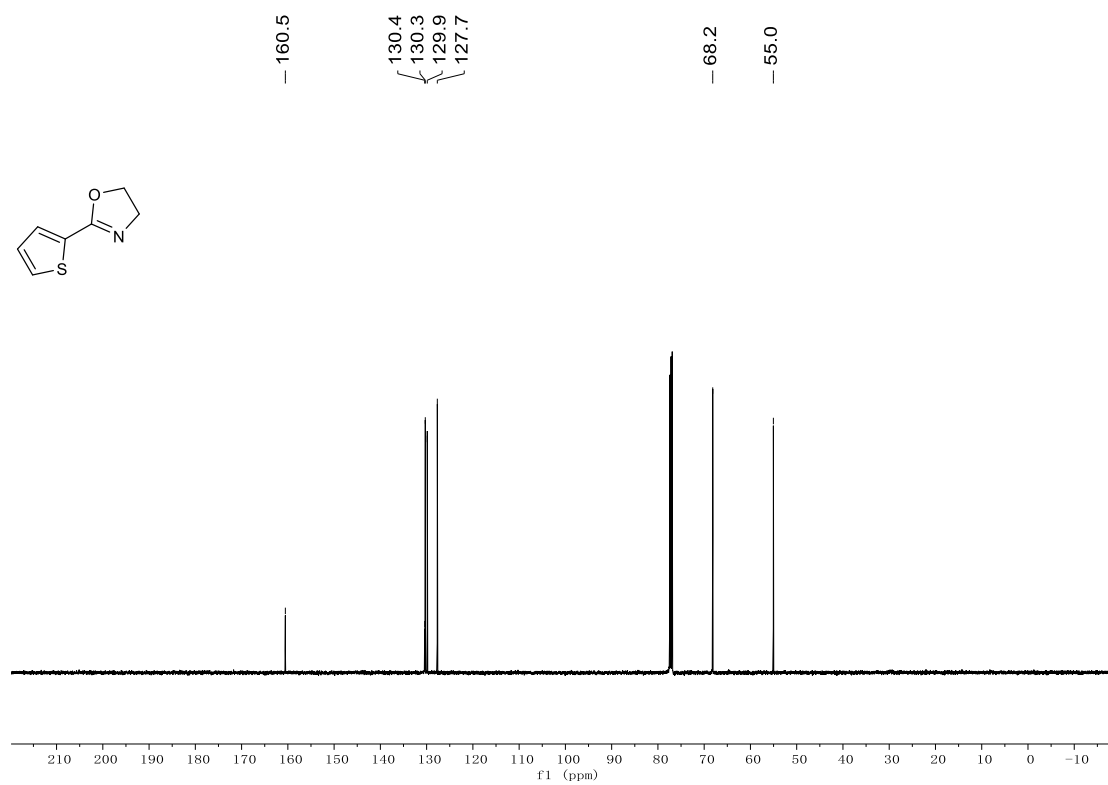

**15,  $^1\text{H}$  NMR (500 MHz,  $\text{CDCl}_3$ )**

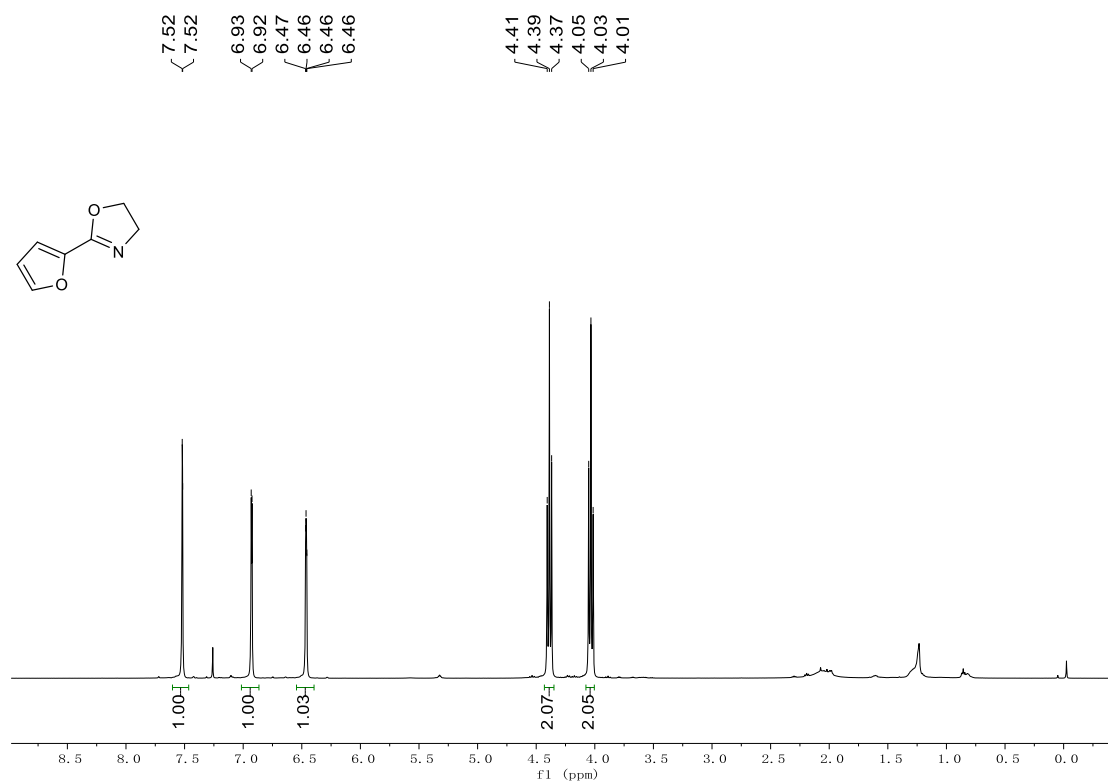

**15,  $^{13}\text{C}$  NMR (126 MHz,  $\text{CDCl}_3$ )**

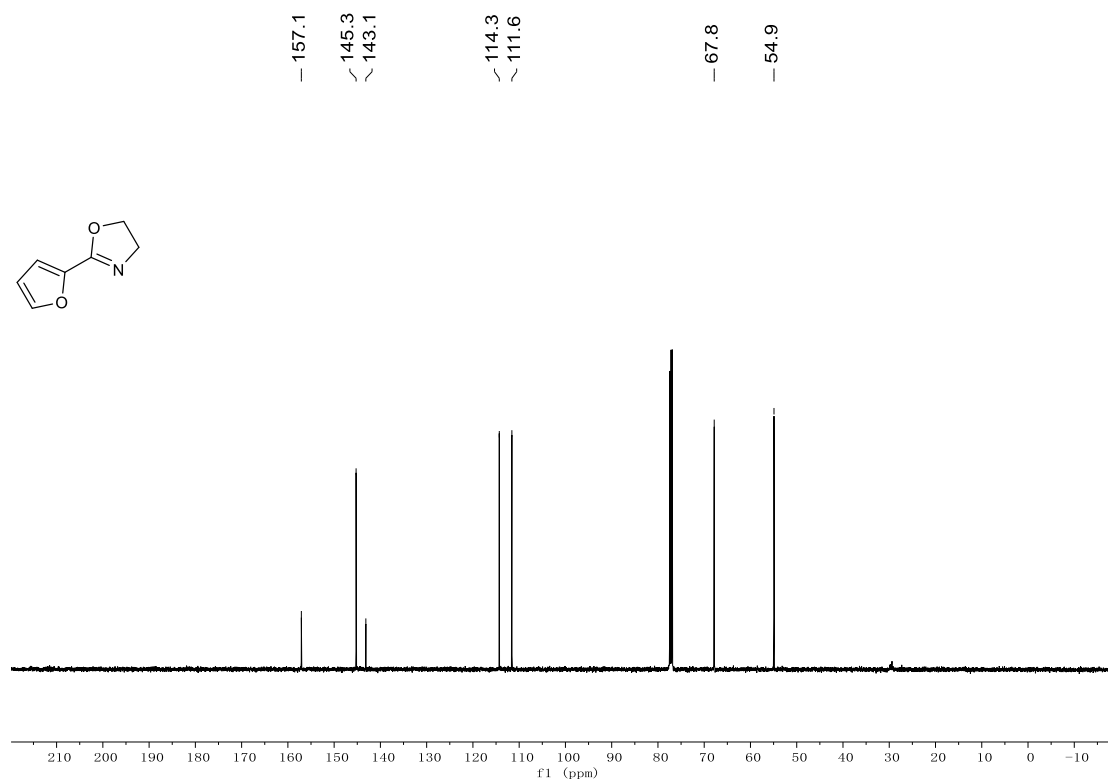

**16**,  $^1\text{H}$  NMR (500 MHz,  $\text{CDCl}_3$ )

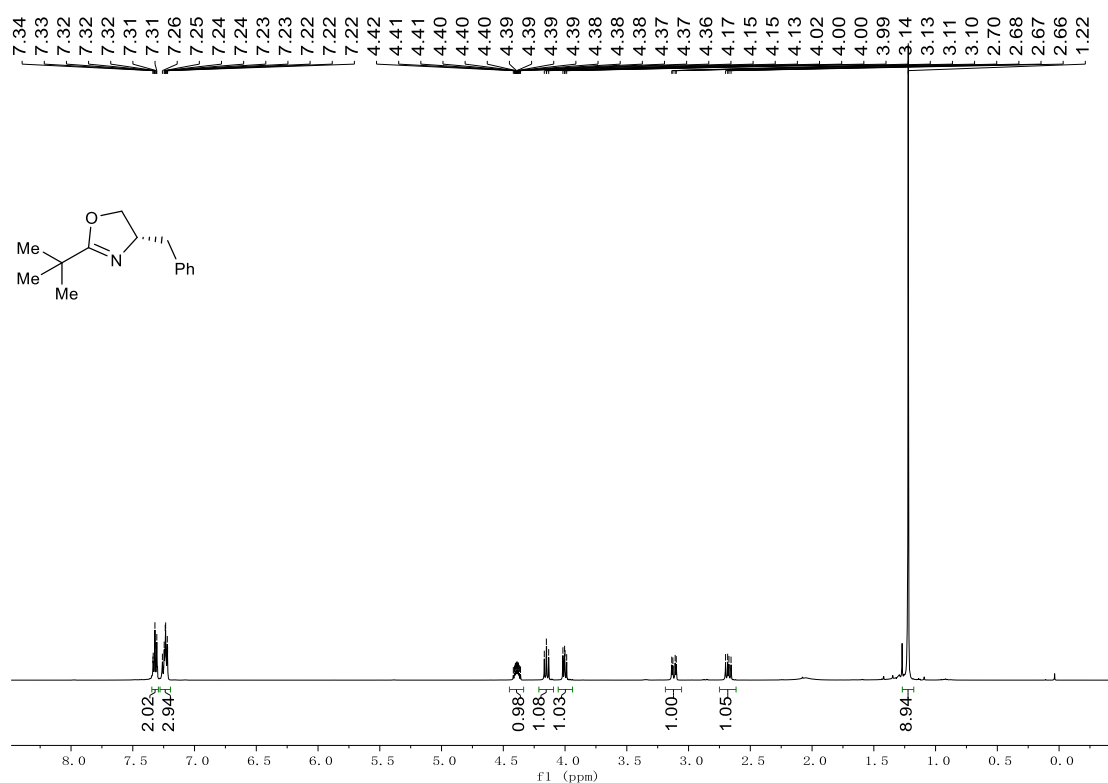

**16**,  $^{13}\text{C}$  NMR (126 MHz,  $\text{CDCl}_3$ )

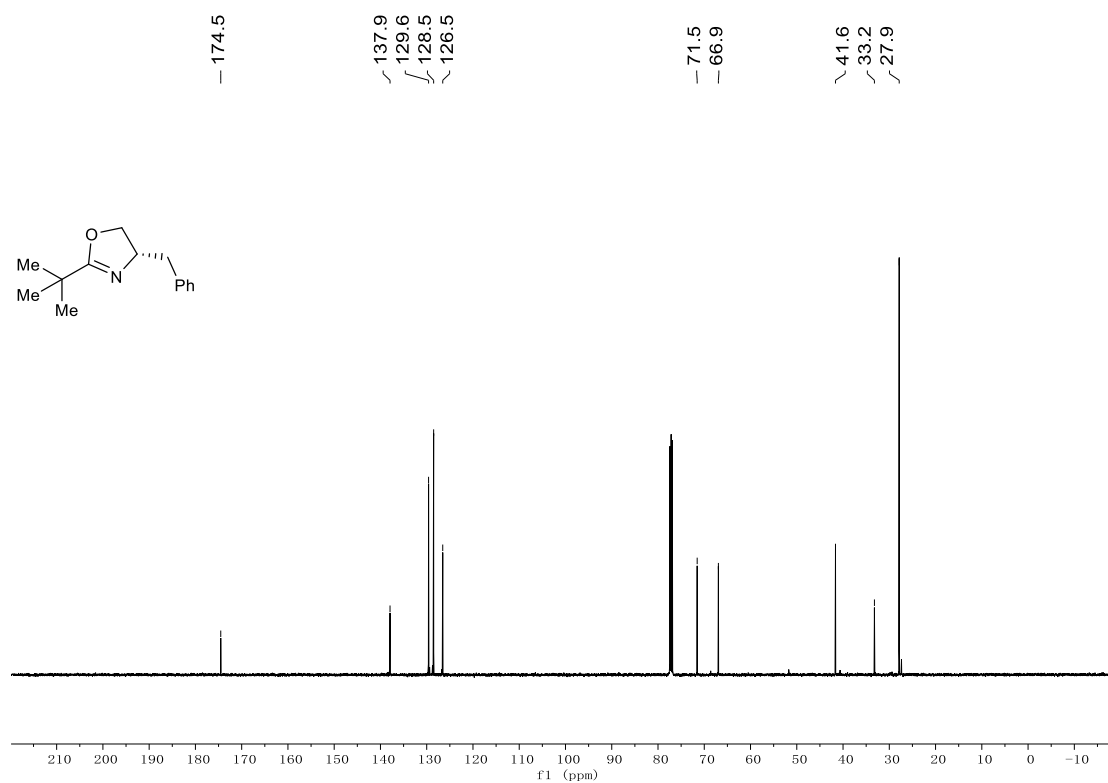

**17,  $^1\text{H}$  NMR (500 MHz,  $\text{CDCl}_3$ )**

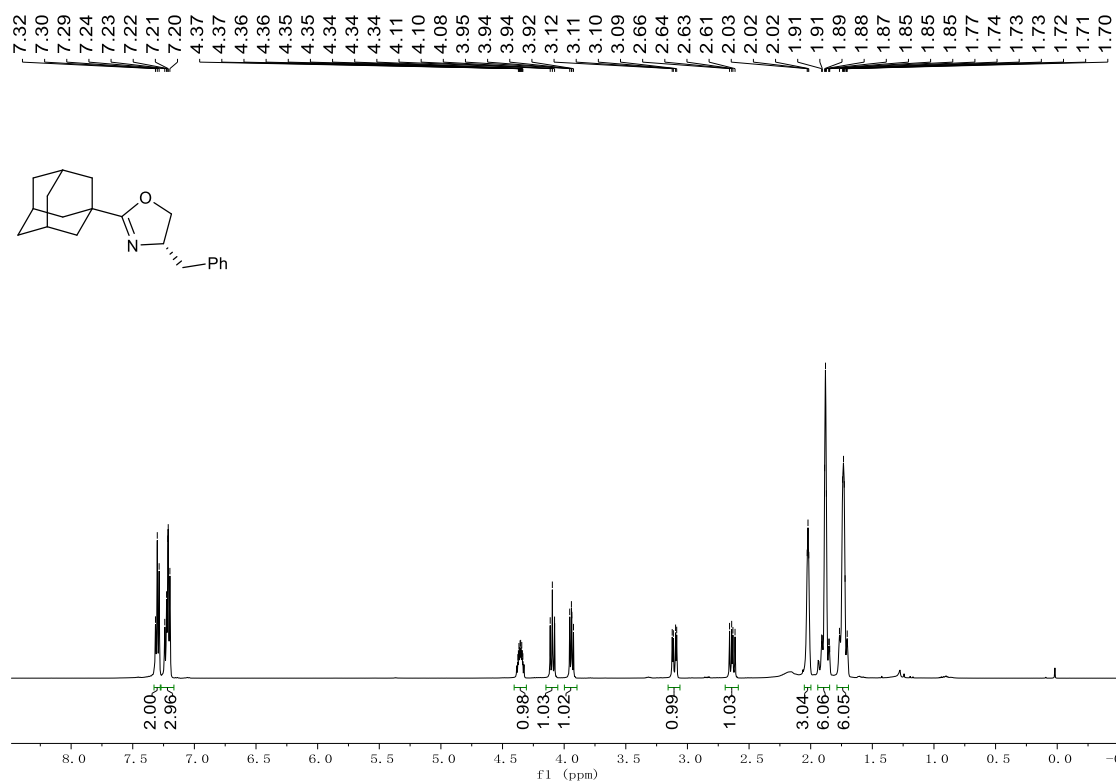

**17,  $^{13}\text{C}$  NMR (126 MHz,  $\text{CDCl}_3$ )**

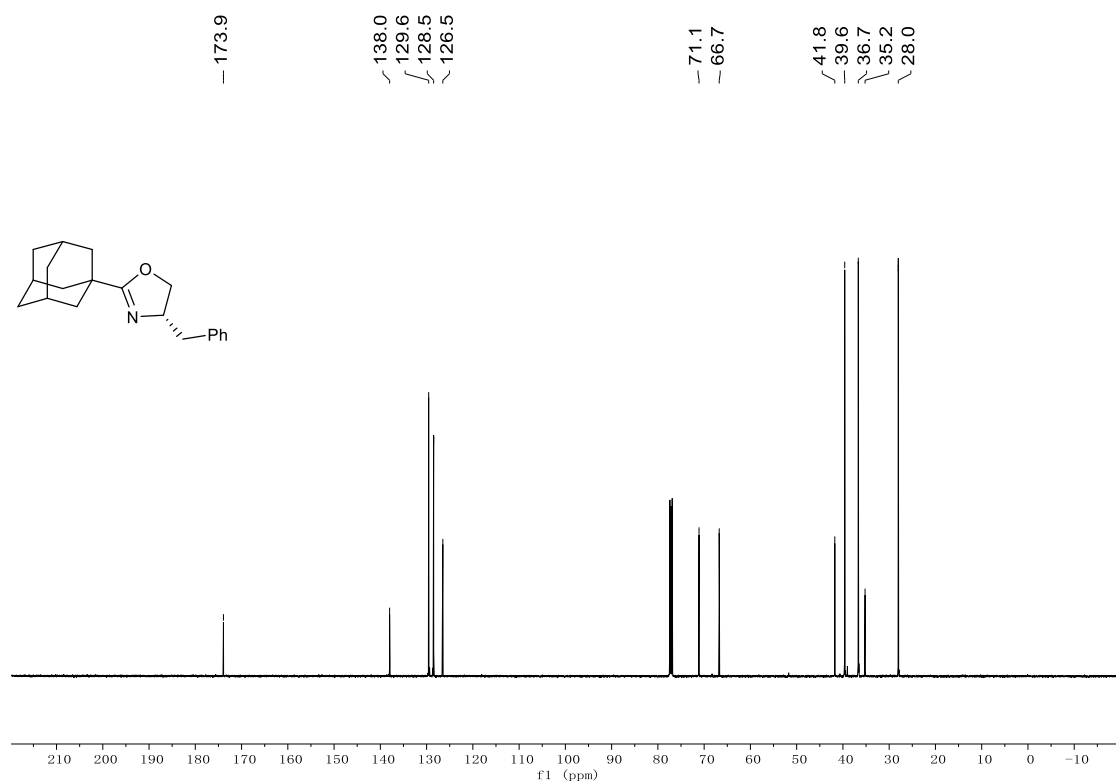

**18,  $^1\text{H}$  NMR (500 MHz,  $\text{CDCl}_3$ )**

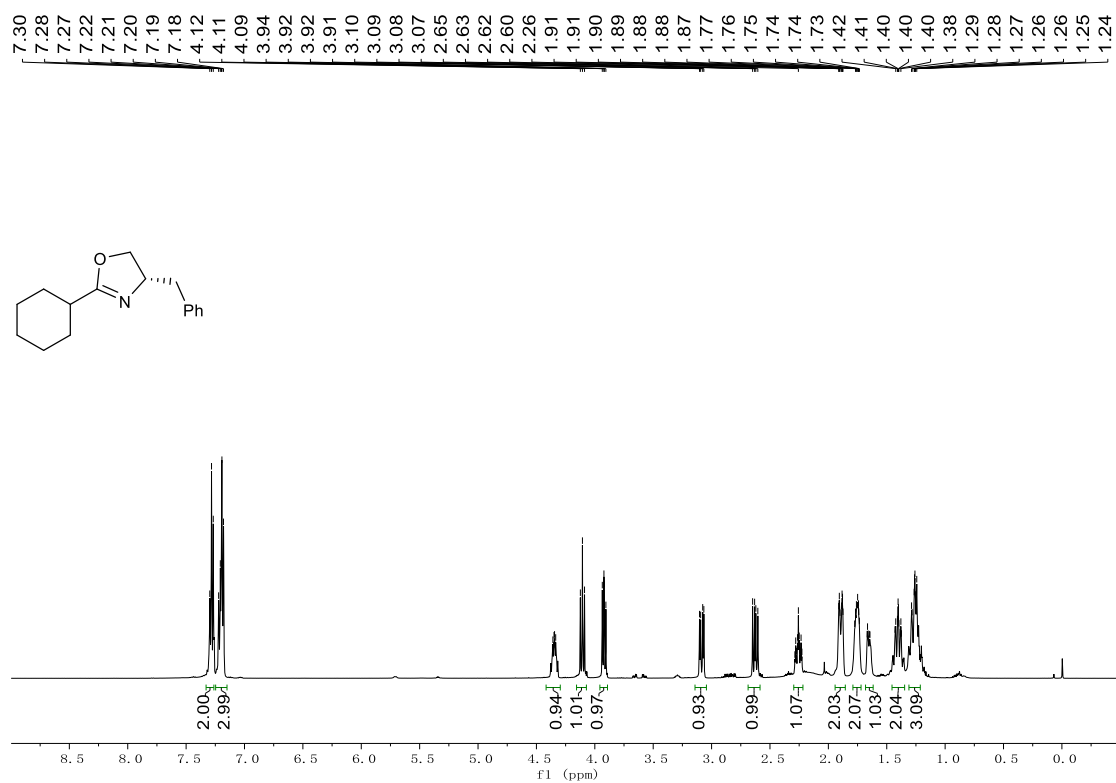

**18,  $^{13}\text{C}$  NMR (126 MHz,  $\text{CDCl}_3$ )**

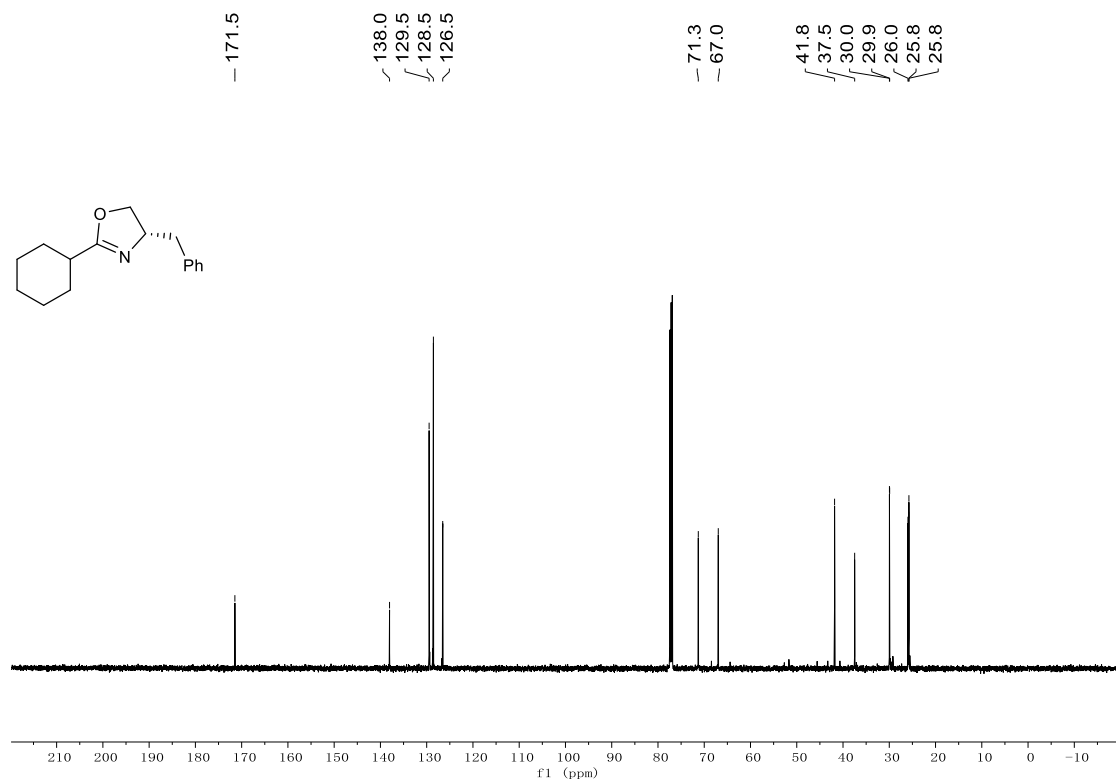

**19,  $^1\text{H}$  NMR (500 MHz,  $\text{CDCl}_3$ )**

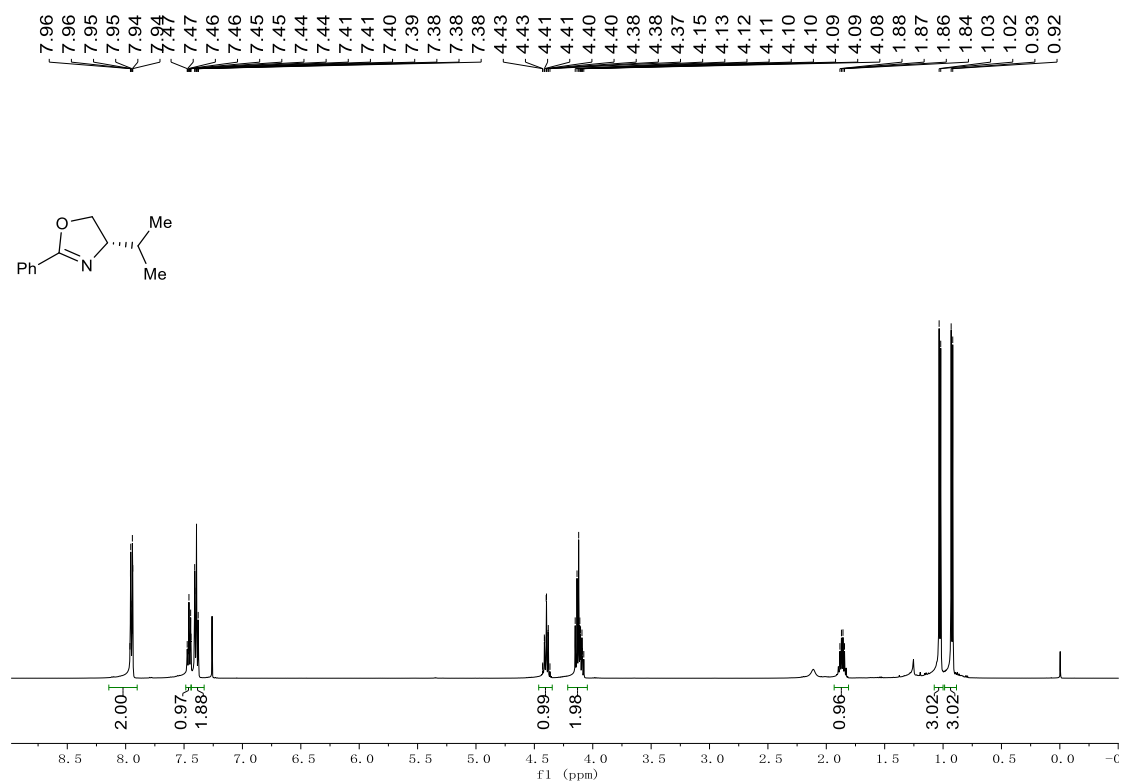

**19,  $^{13}\text{C}$  NMR (126 MHz,  $\text{CDCl}_3$ )**

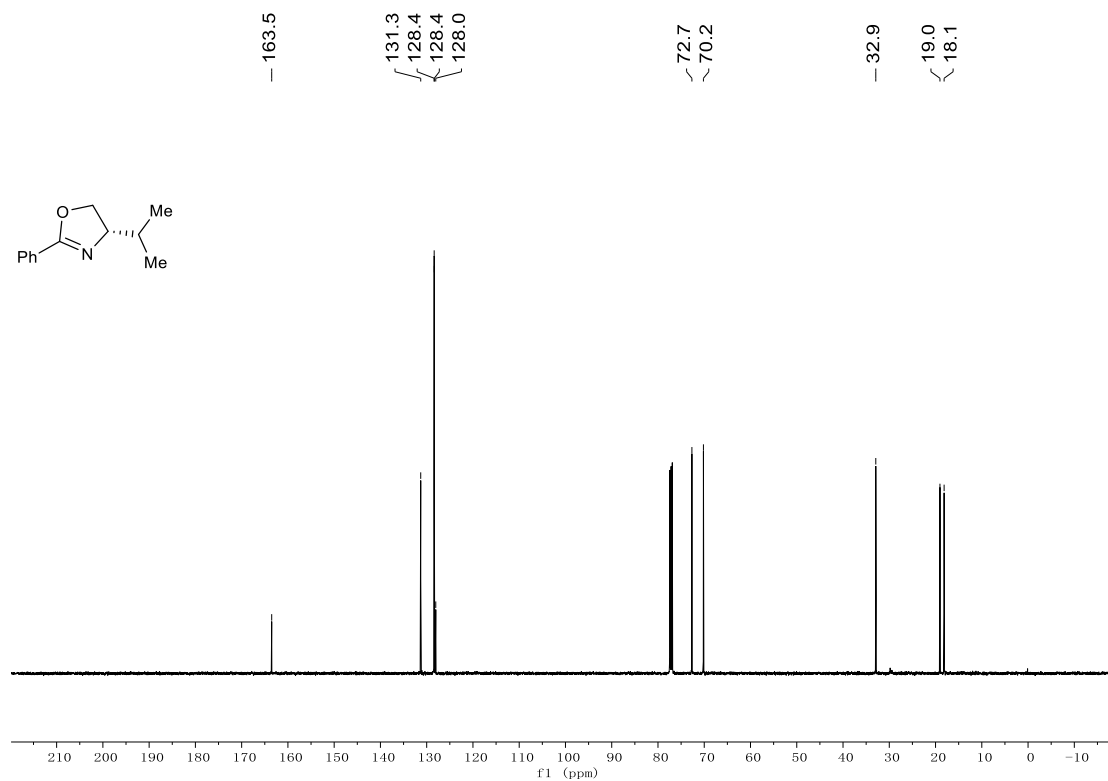

**20**,  $^1\text{H}$  NMR (500 MHz,  $\text{CDCl}_3$ )

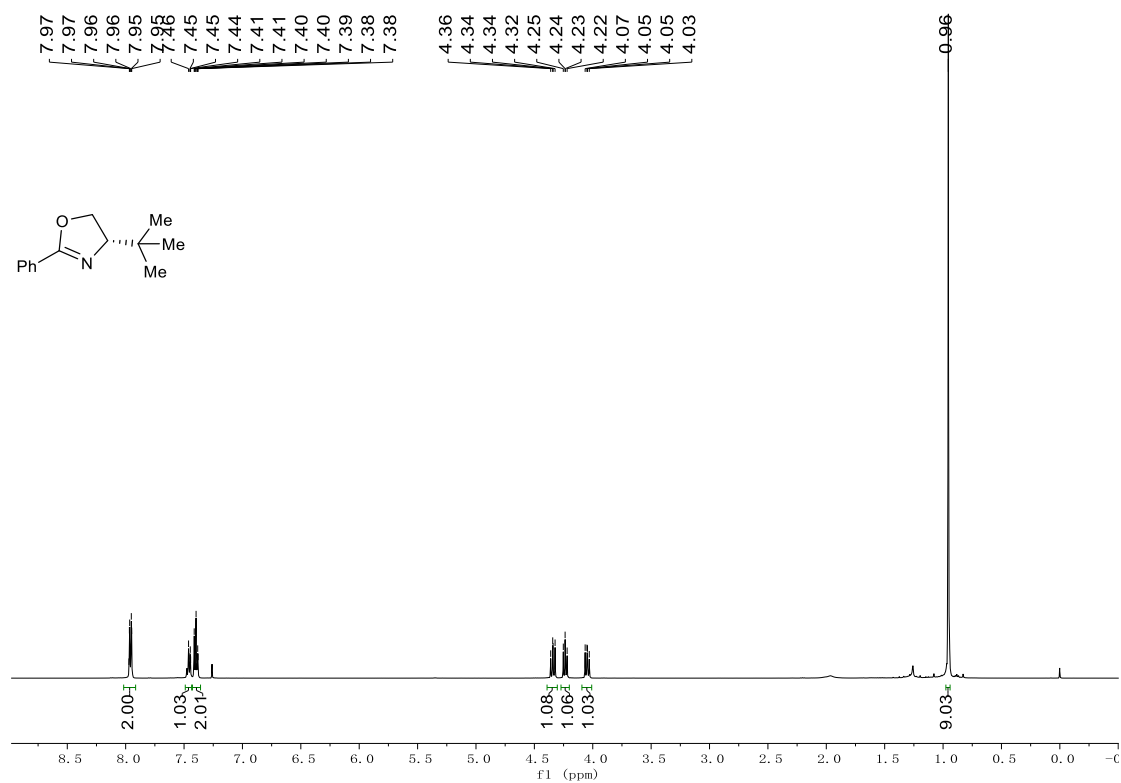

**20**,  $^{13}\text{C}$  NMR (126 MHz,  $\text{CDCl}_3$ )

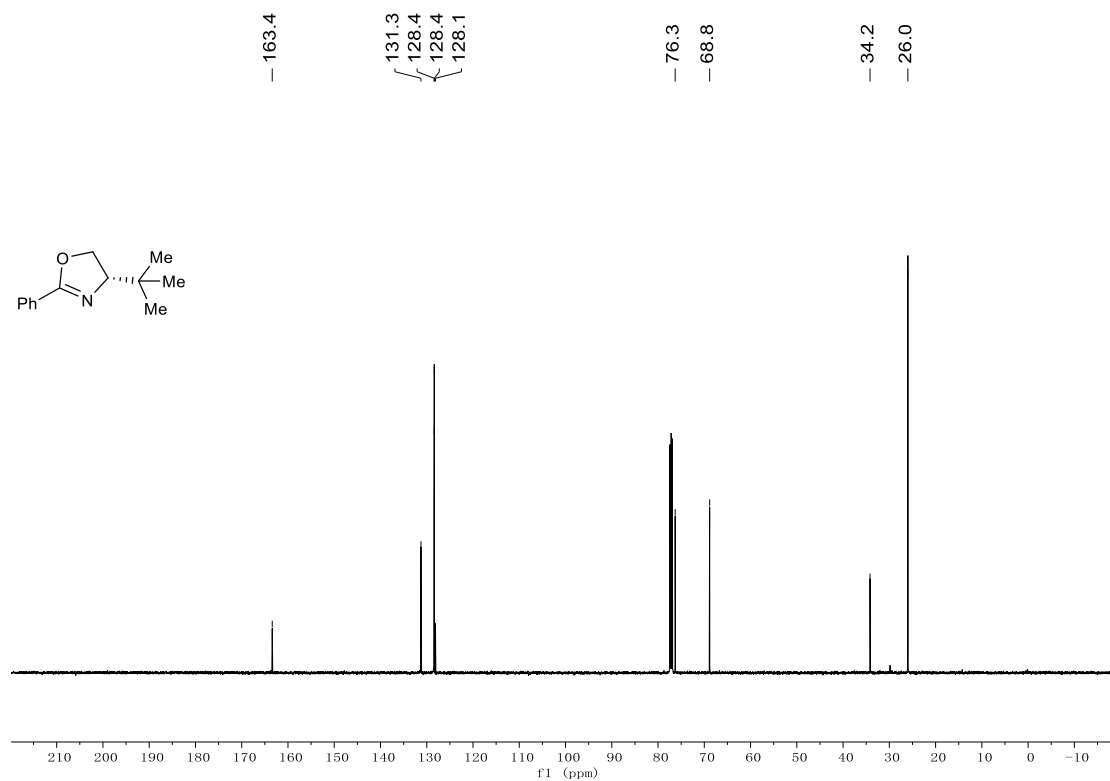



**21**,  $^1\text{H}$  NMR (500 MHz,  $\text{CDCl}_3$ )

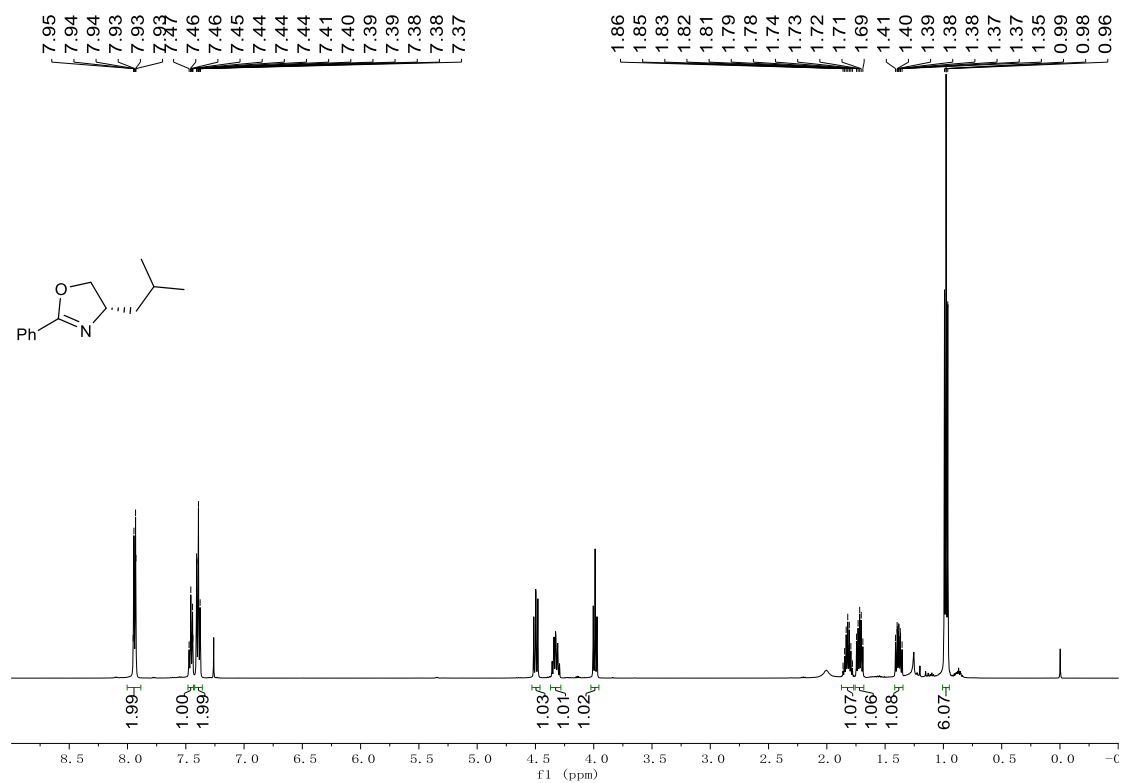

**21**,  $^{13}\text{C}$  NMR (126 MHz,  $\text{CDCl}_3$ )

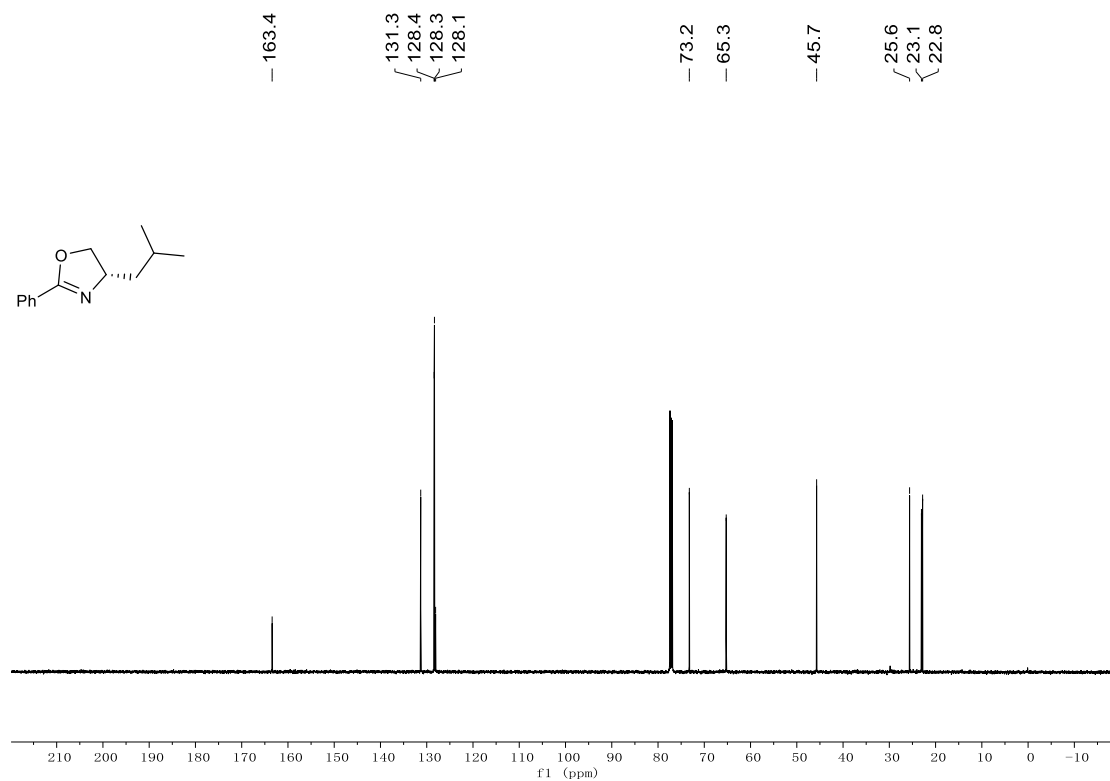

**22,  $^1\text{H}$  NMR (500 MHz,  $\text{CDCl}_3$ )**

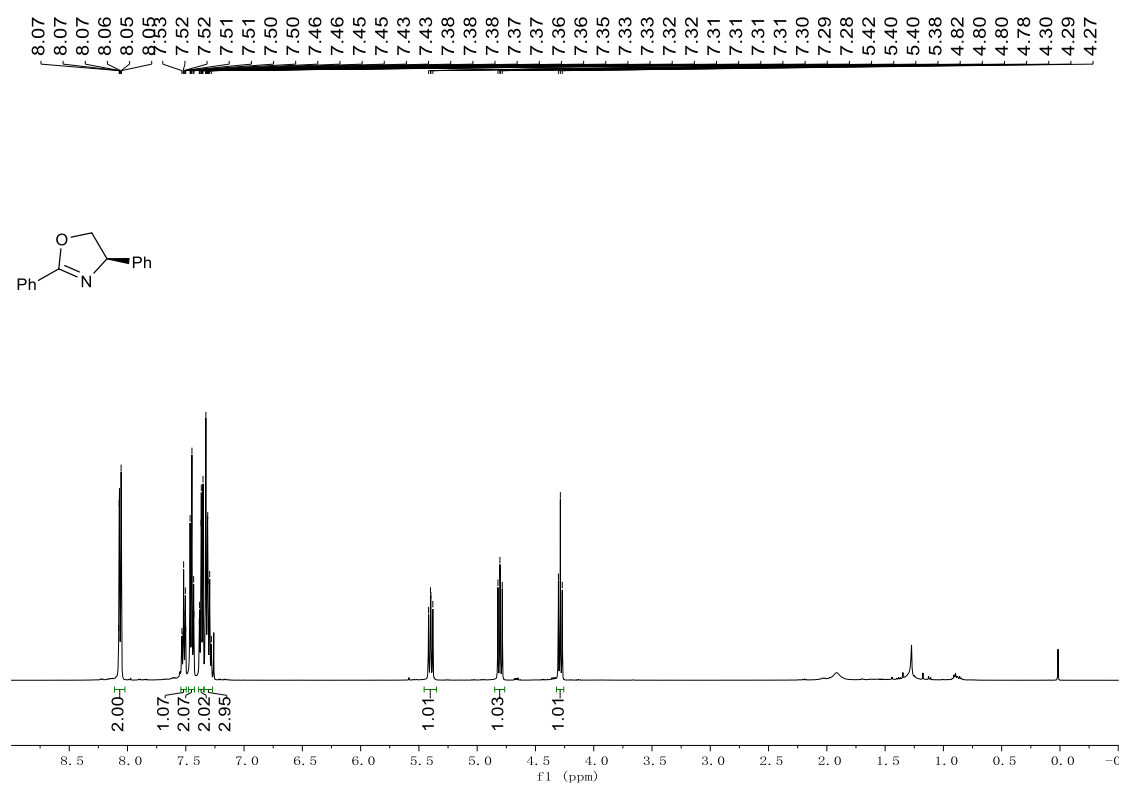

**22,  $^{13}\text{C}$  NMR (126 MHz,  $\text{CDCl}_3$ )**

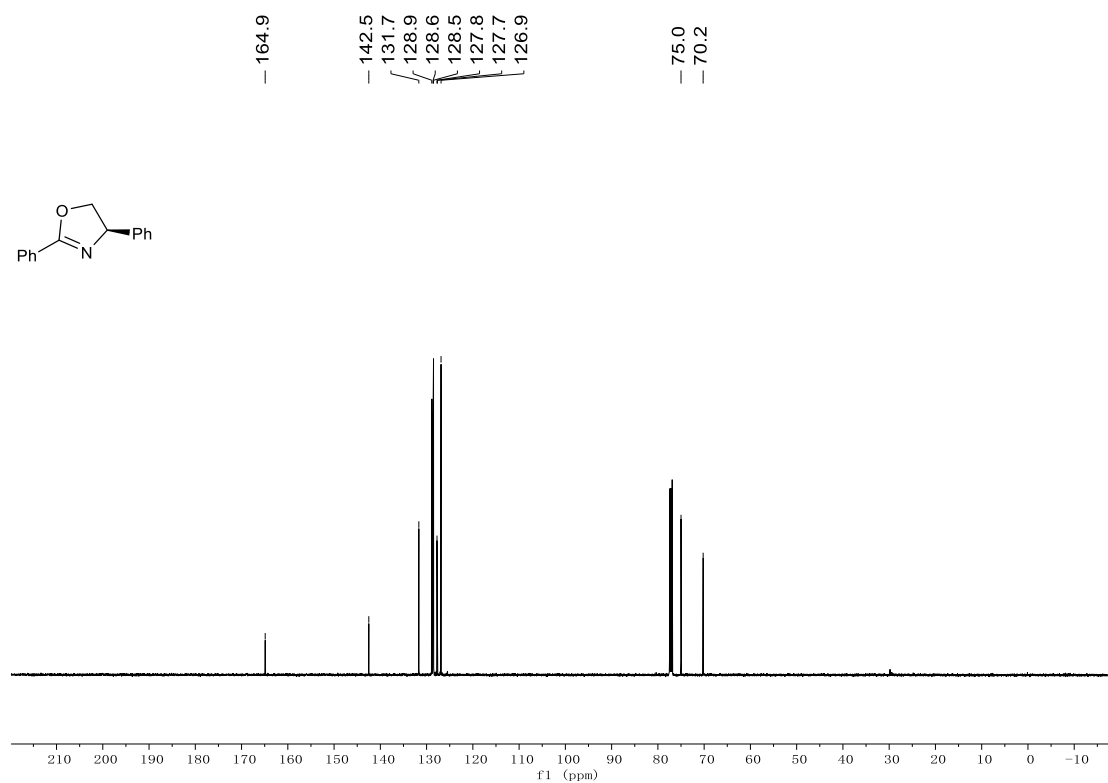

**23**,  $^1\text{H}$  NMR (500 MHz,  $\text{CDCl}_3$ )

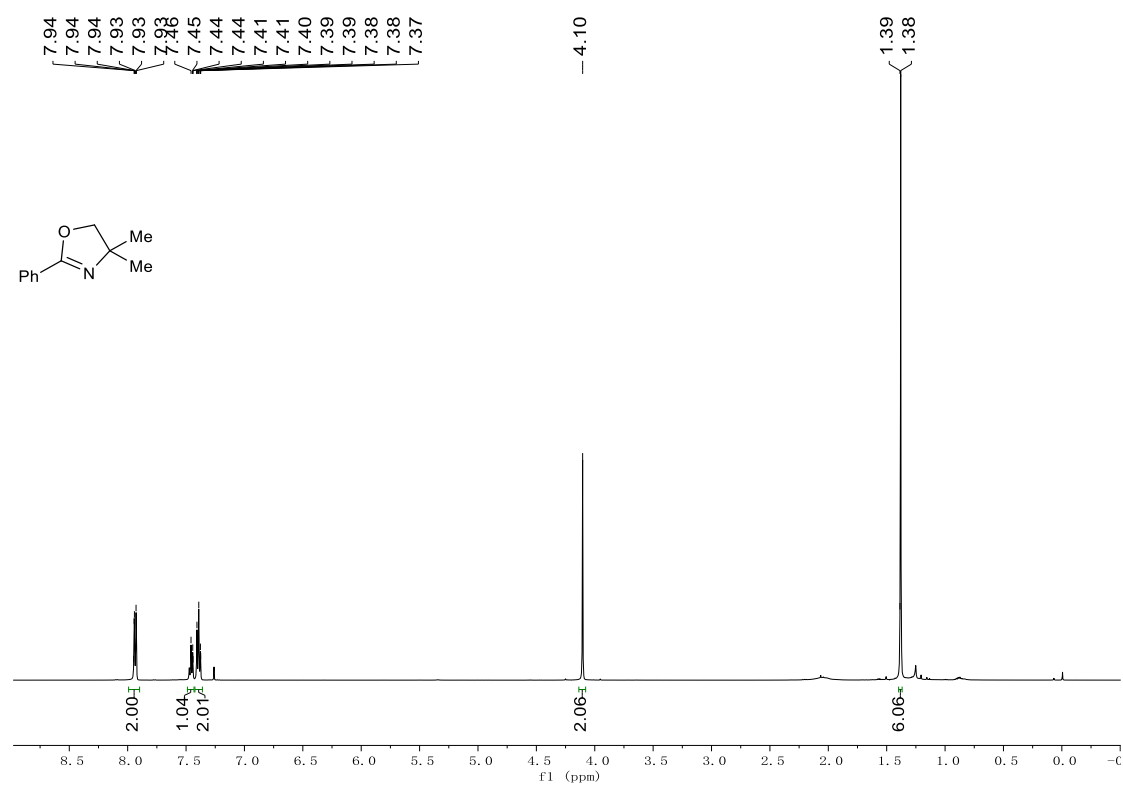

**23**,  $^{13}\text{C}$  NMR (126 MHz,  $\text{CDCl}_3$ )

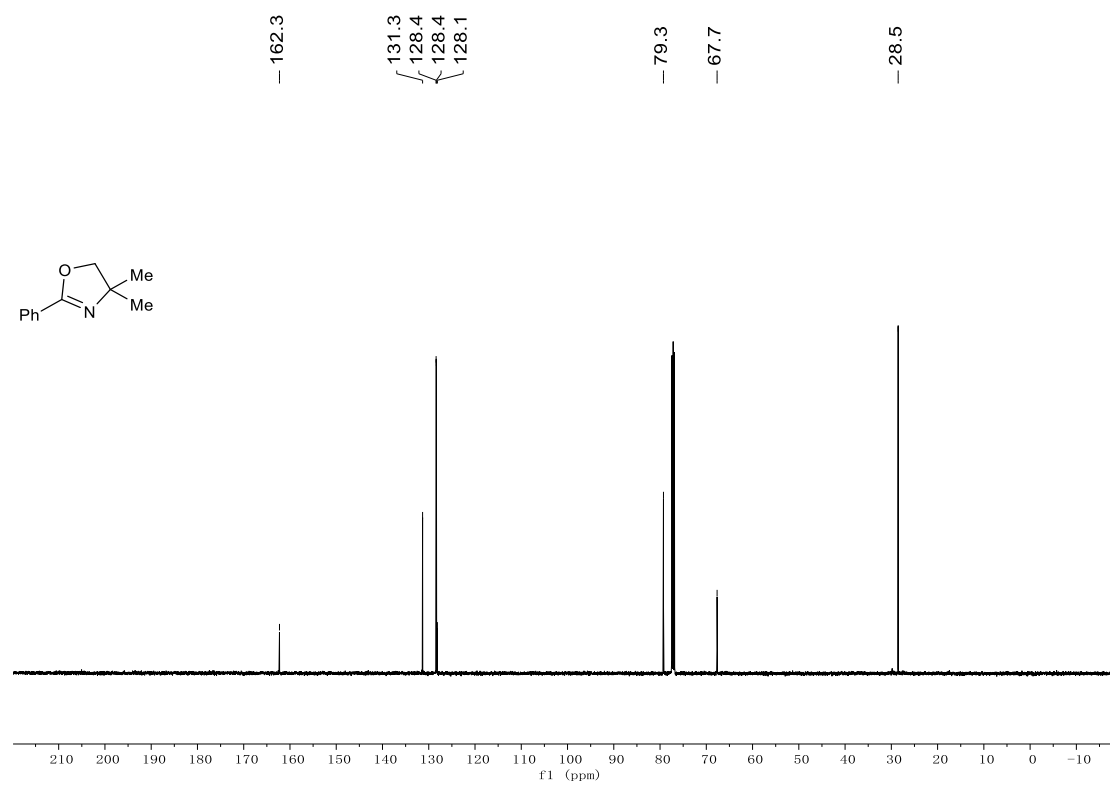

**24**,  $^1\text{H}$  NMR (500 MHz,  $\text{CDCl}_3$ )

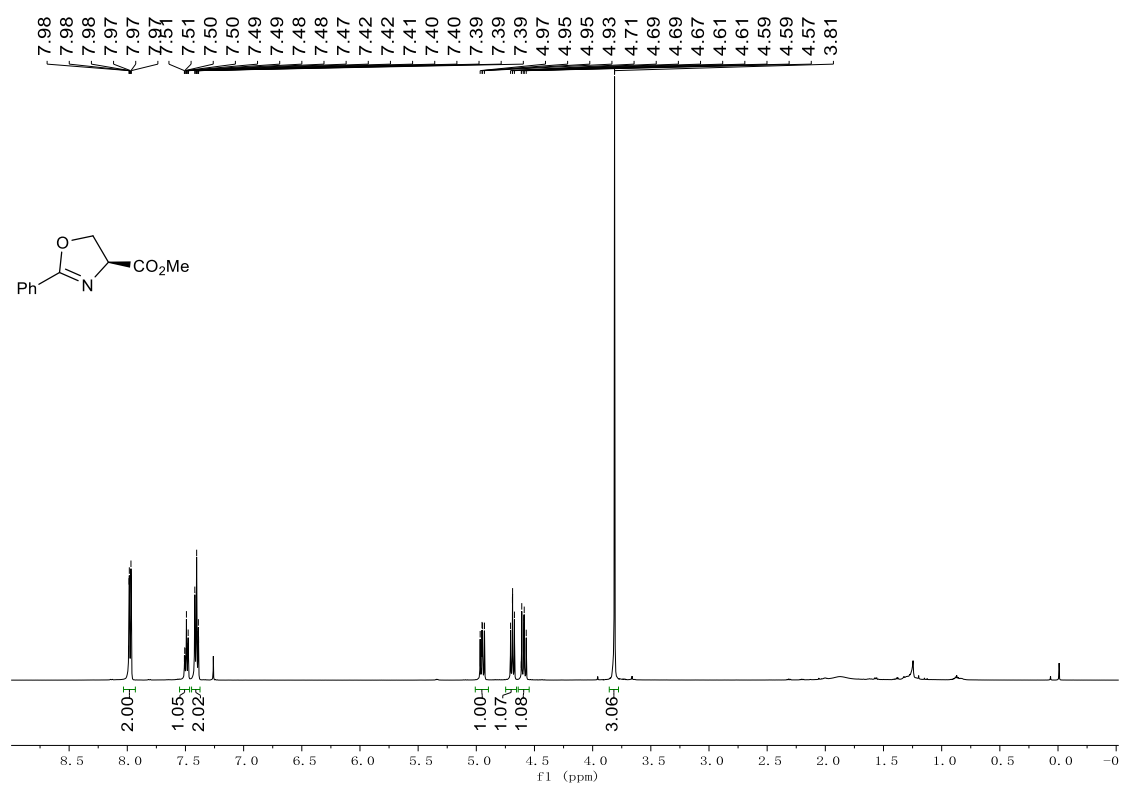

**24**  $^{13}\text{C}$  NMR (126 MHz,  $\text{CDCl}_3$ )

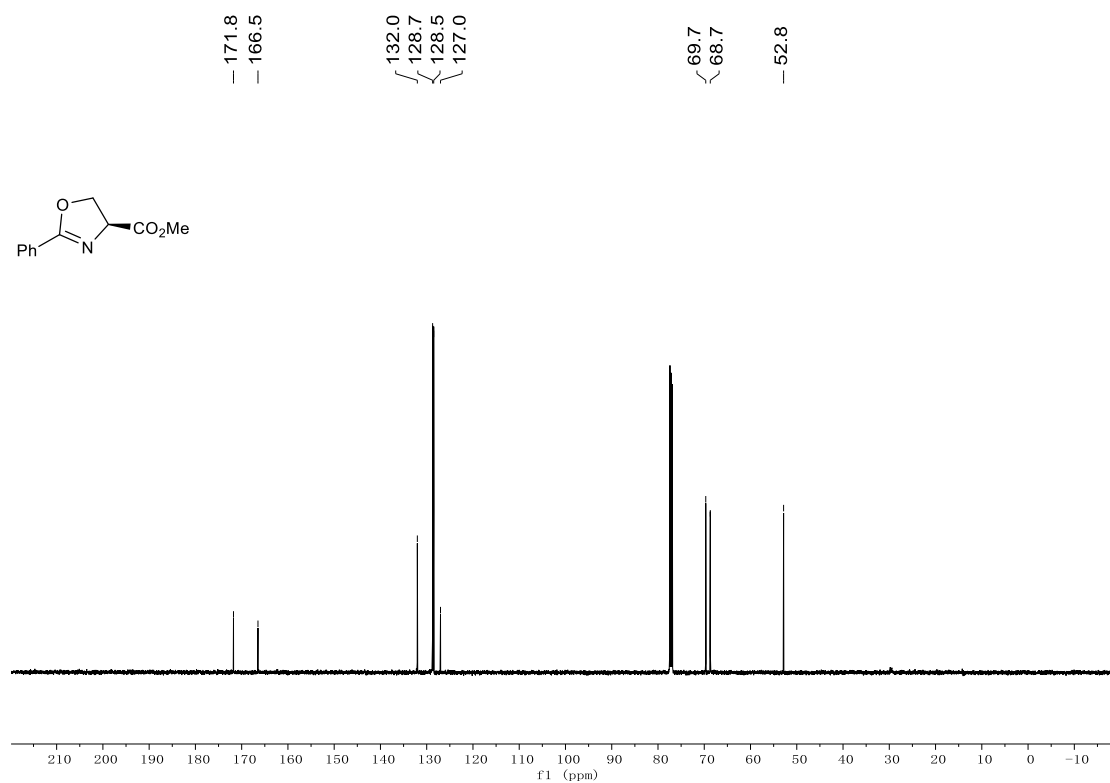

**25**,  $^1\text{H}$  NMR (500 MHz,  $\text{CDCl}_3$ )

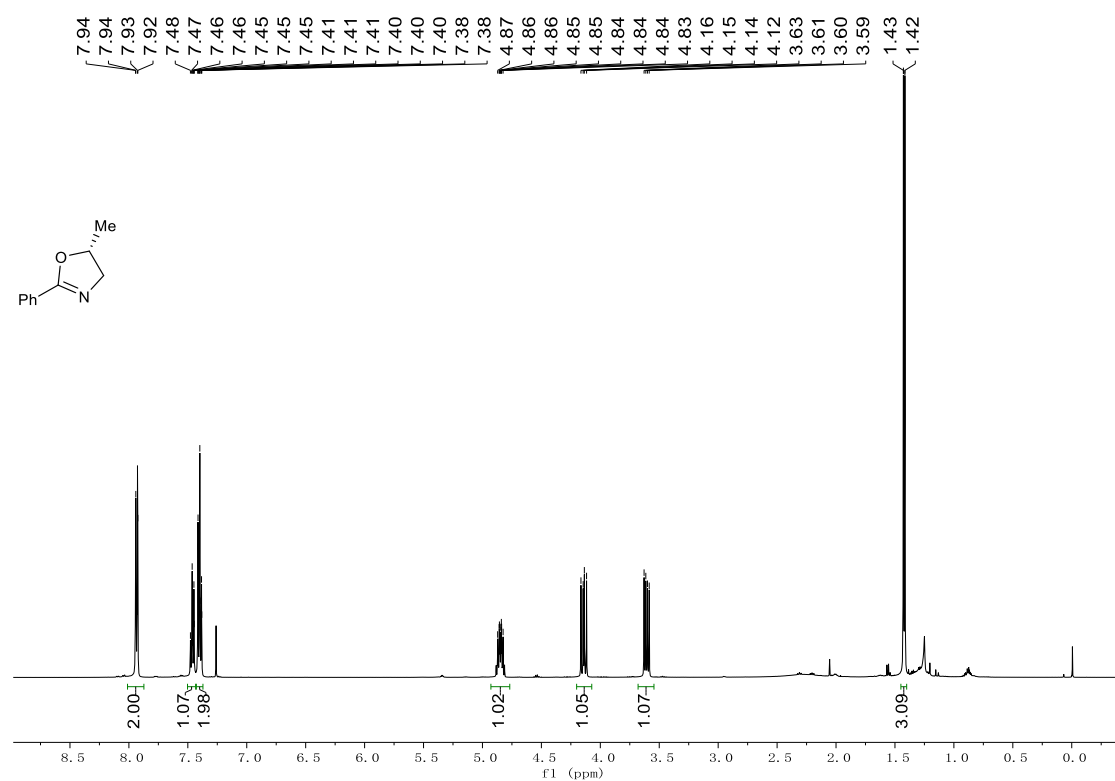

**25**,  $^{13}\text{C}$  NMR (126 MHz,  $\text{CDCl}_3$ )

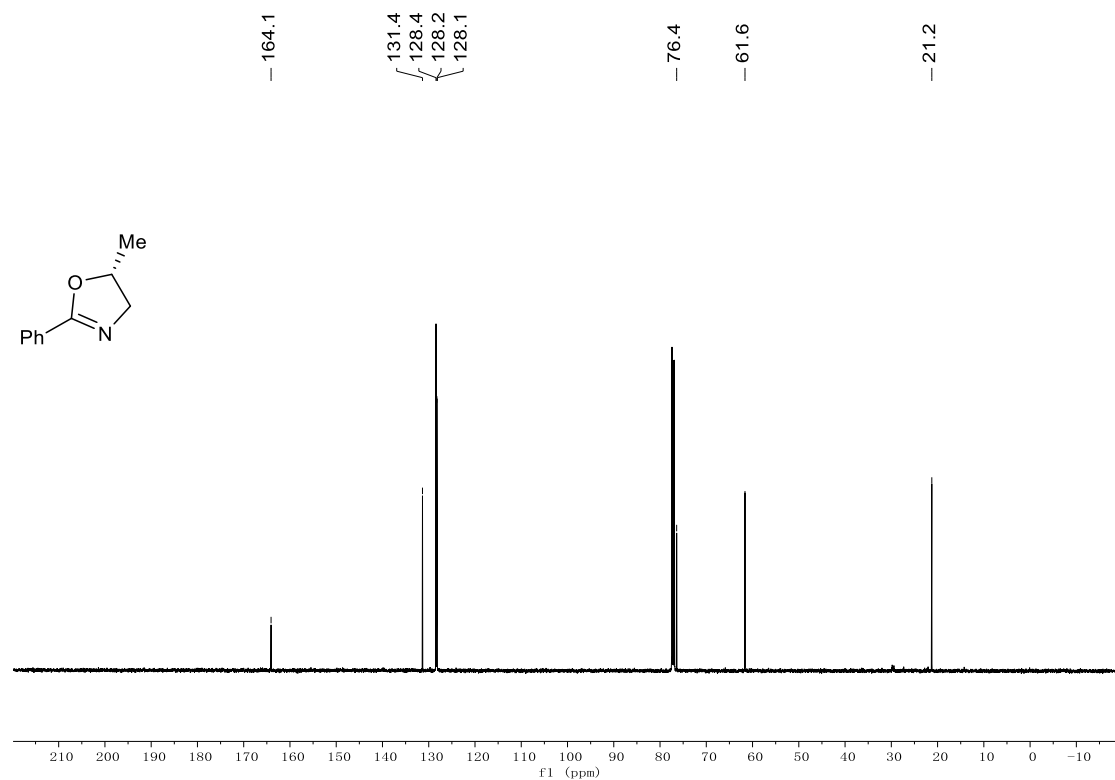

**26**,  $^1\text{H}$  NMR (500 MHz,  $\text{CDCl}_3$ )

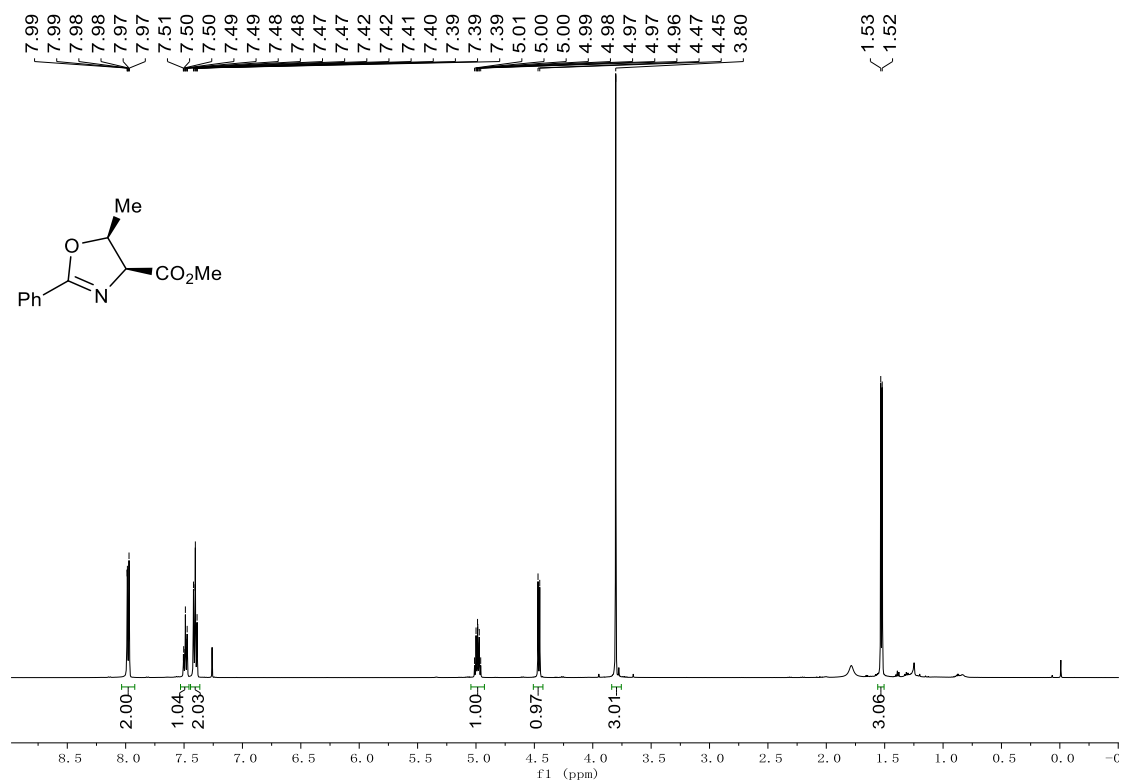

**26**,  $^{13}\text{C}$  NMR (126 MHz,  $\text{CDCl}_3$ )

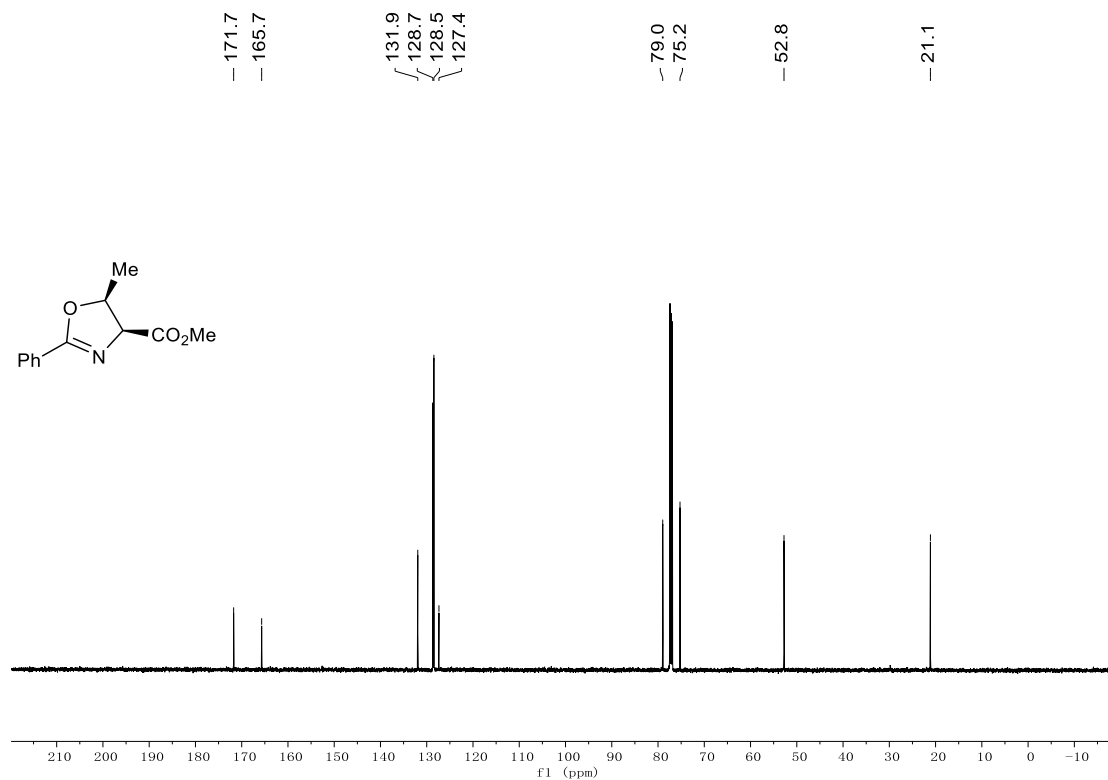

|      |      |      |      |      |      |      |      |      |      |      |      |      |      |      |      |      |      |      |      |      |      |      |      |      |      |      |      |      |      |      |      |      |      |      |      |      |      |      |      |      |      |      |      |      |      |      |      |      |      |      |
|------|------|------|------|------|------|------|------|------|------|------|------|------|------|------|------|------|------|------|------|------|------|------|------|------|------|------|------|------|------|------|------|------|------|------|------|------|------|------|------|------|------|------|------|------|------|------|------|------|------|------|
| 7.95 | 7.94 | 7.94 | 7.94 | 7.93 | 7.93 | 7.92 | 7.59 | 7.59 | 7.58 | 7.57 | 7.45 | 7.44 | 7.44 | 7.43 | 7.43 | 7.42 | 7.42 | 7.38 | 7.38 | 7.37 | 7.37 | 7.37 | 7.36 | 7.35 | 7.35 | 7.29 | 7.28 | 7.27 | 7.27 | 7.26 | 5.75 | 5.74 | 5.50 | 5.50 | 5.49 | 5.49 | 5.48 | 5.47 | 5.47 | 5.47 | 3.53 | 3.52 | 3.49 | 3.48 | 3.48 | 3.39 | 3.39 | 3.35 | 3.35 | 3.35 |
|------|------|------|------|------|------|------|------|------|------|------|------|------|------|------|------|------|------|------|------|------|------|------|------|------|------|------|------|------|------|------|------|------|------|------|------|------|------|------|------|------|------|------|------|------|------|------|------|------|------|------|

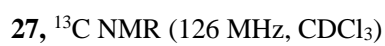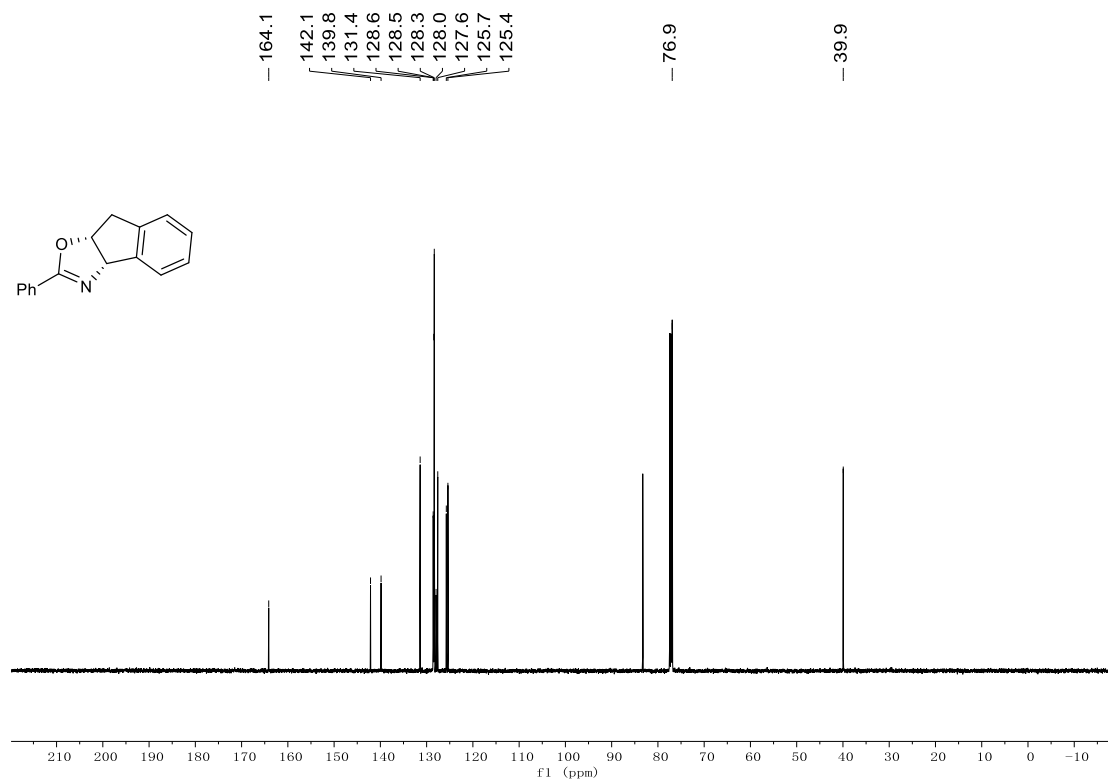

**28,  $^1\text{H}$  NMR (500 MHz,  $\text{CDCl}_3$ )**

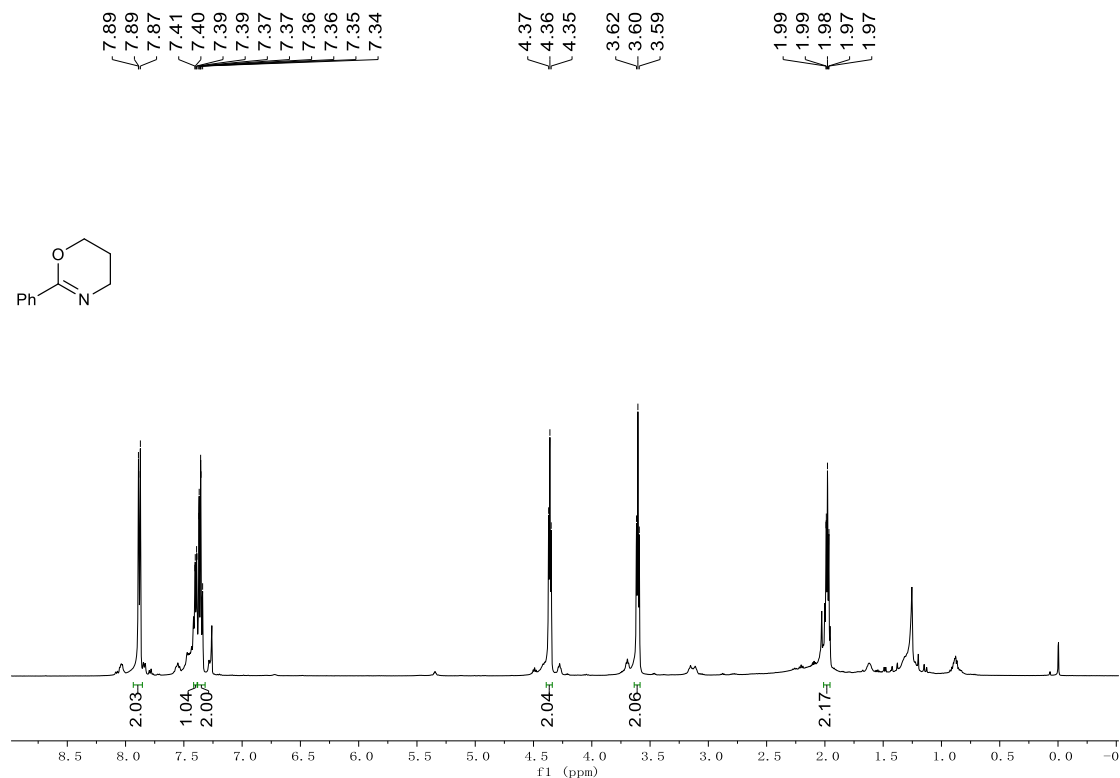

**28,  $^{13}\text{C}$  NMR (126 MHz,  $\text{CDCl}_3$ )**

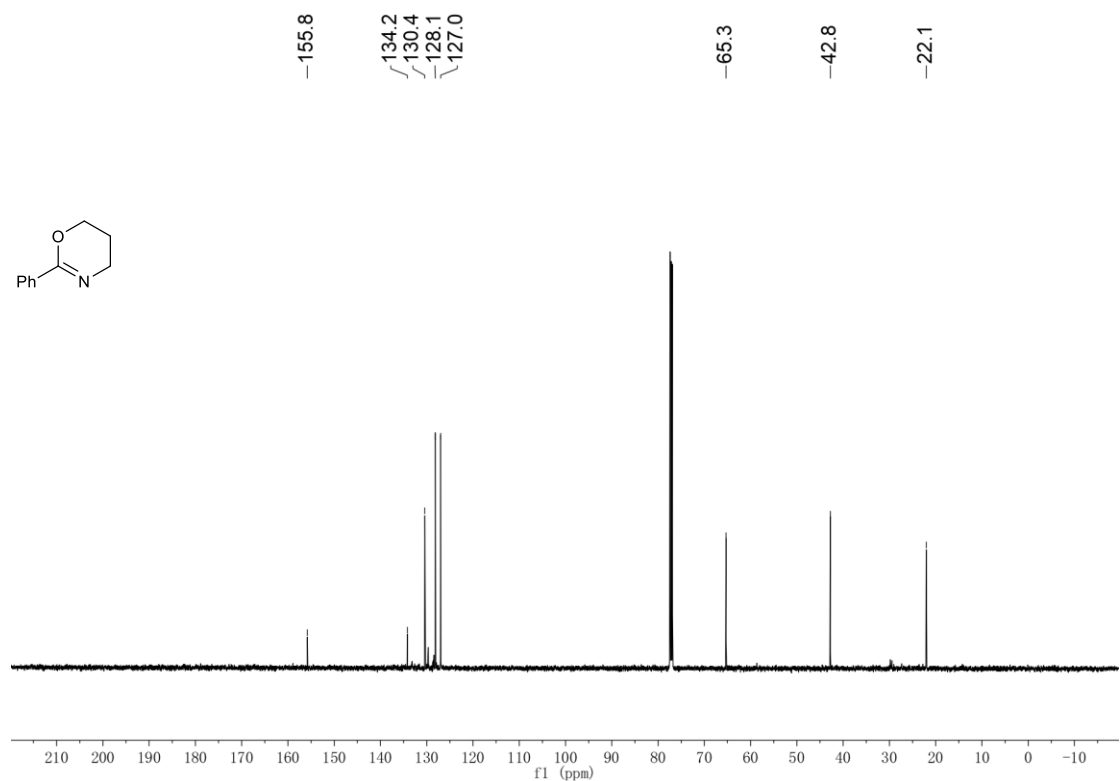



**29,  $^1\text{H}$  NMR (500 MHz,  $\text{CDCl}_3$ )**

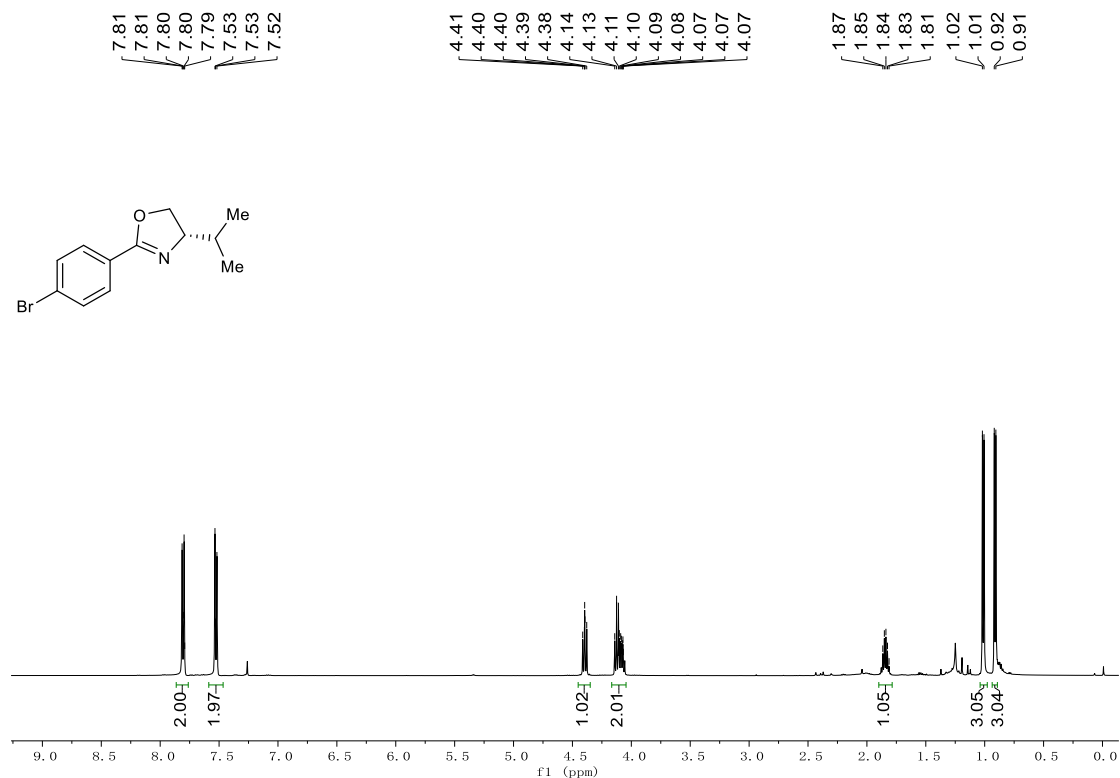

**29,  $^{13}\text{C}$  NMR (126 MHz,  $\text{CDCl}_3$ )**

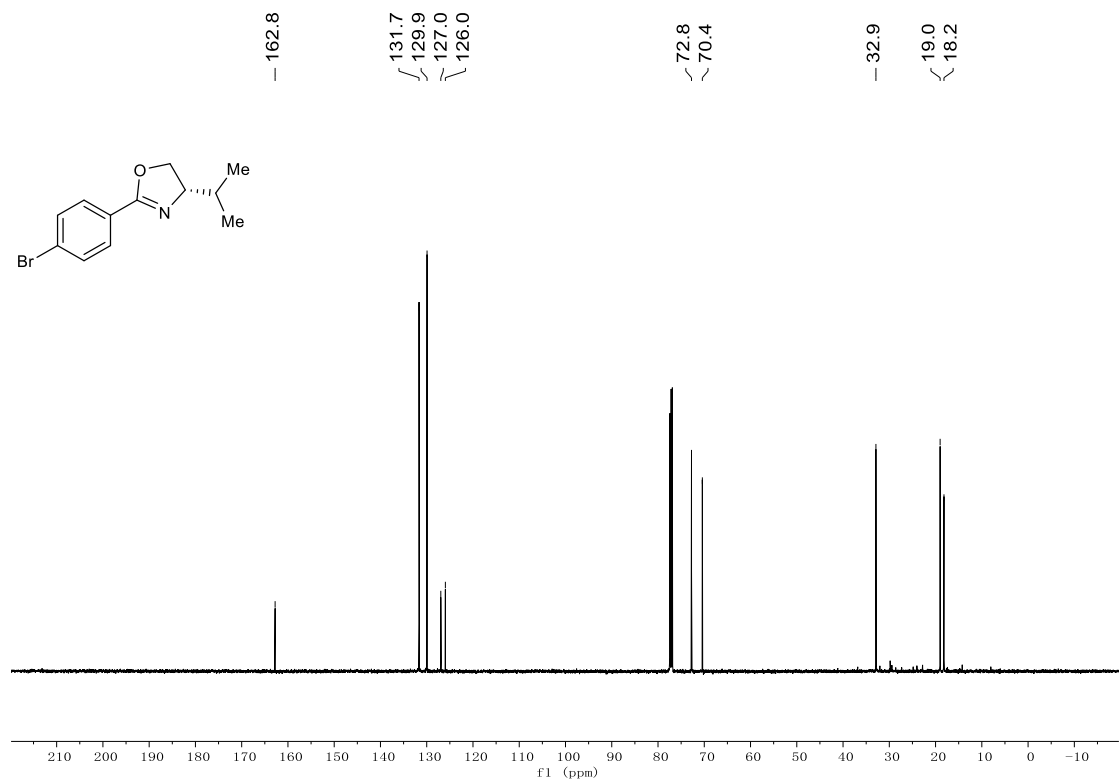

**30**,  $^1\text{H}$  NMR (500 MHz,  $\text{CDCl}_3$ )

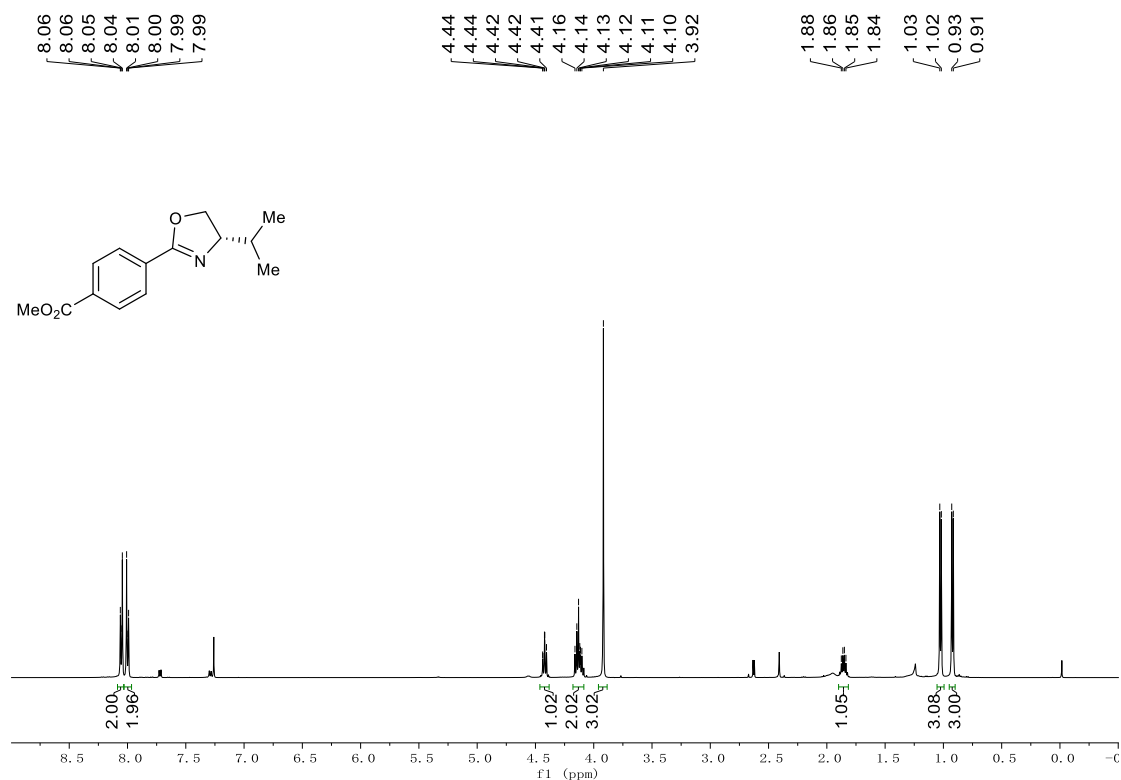

**30**,  $^{13}\text{C}$  NMR (126 MHz,  $\text{CDCl}_3$ )

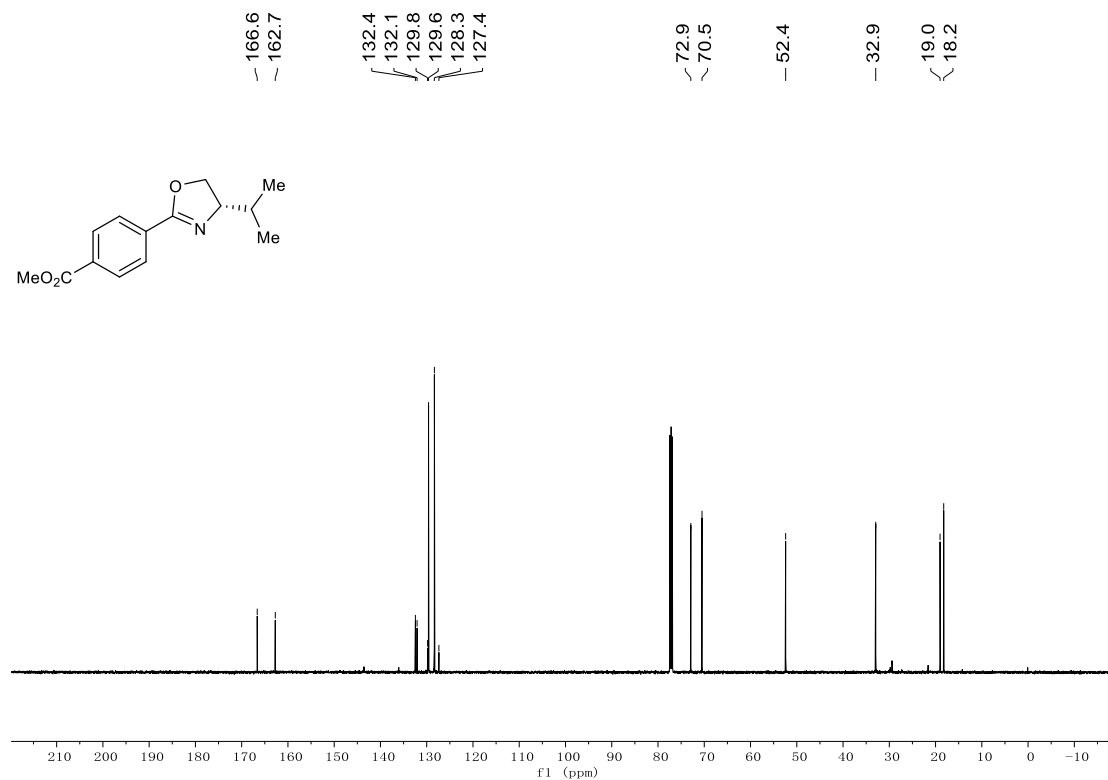

**31,  $^1\text{H}$  NMR (500 MHz,  $\text{CDCl}_3$ )**

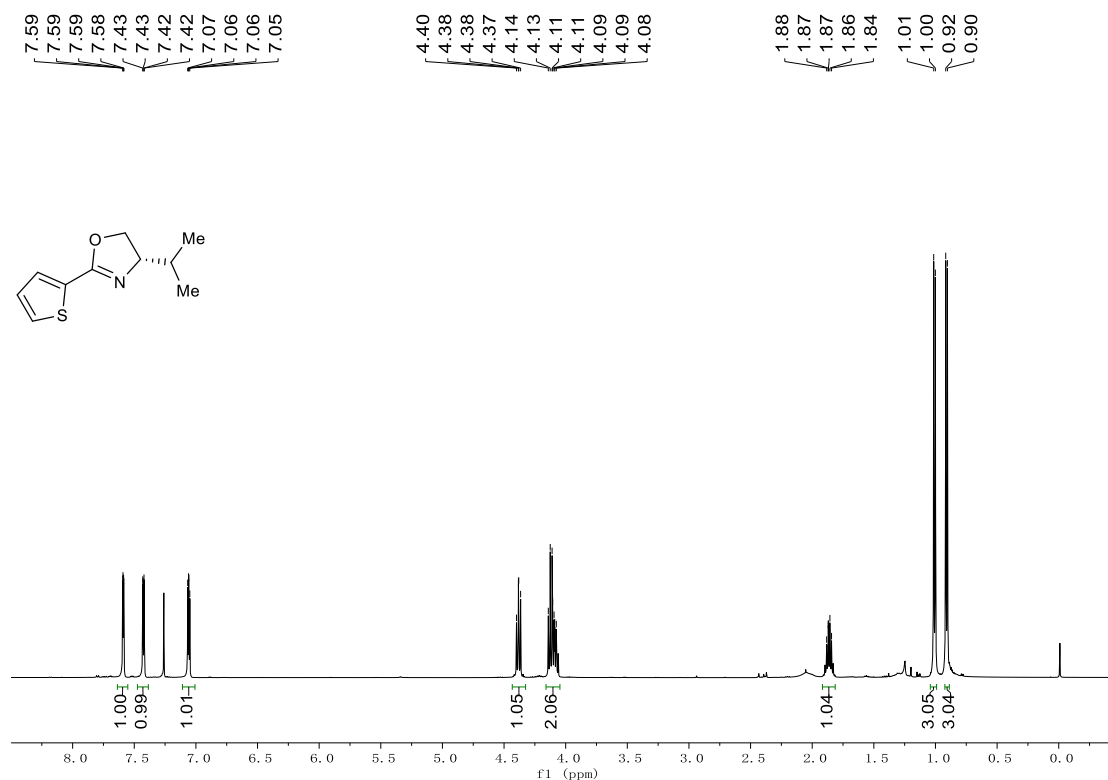

**31,  $^{13}\text{C}$  NMR (126 MHz,  $\text{CDCl}_3$ )**

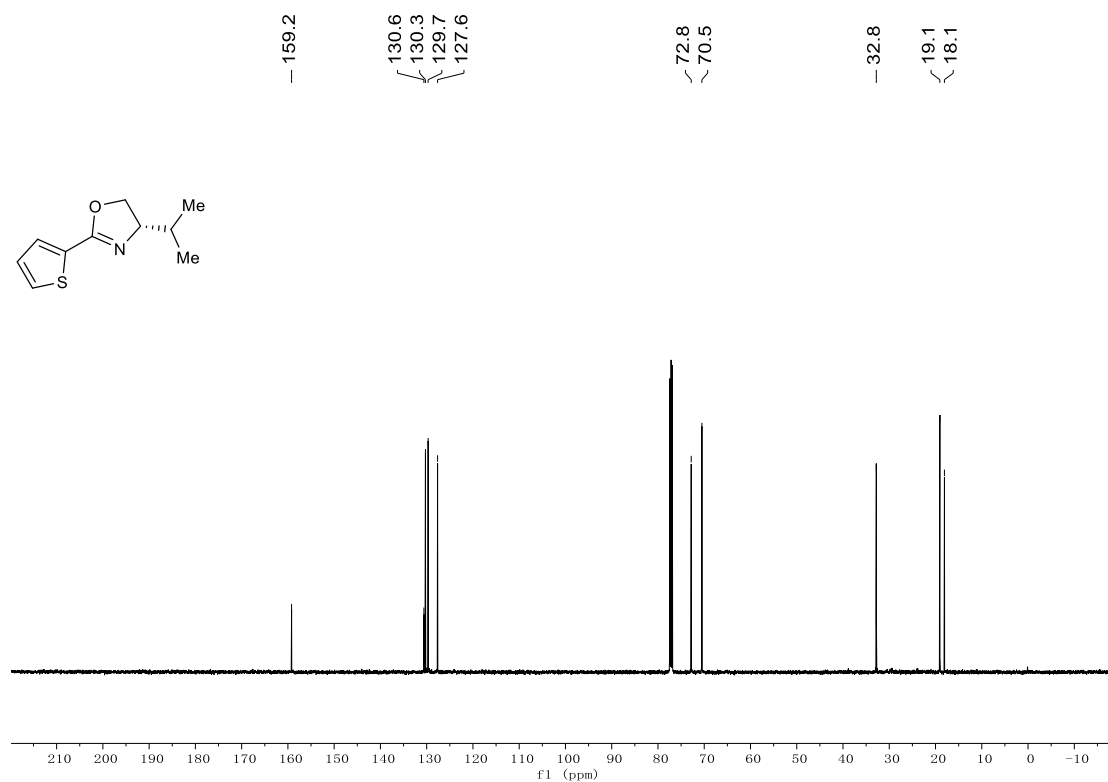

**32,  $^1\text{H}$  NMR (500 MHz,  $\text{CDCl}_3$ )**

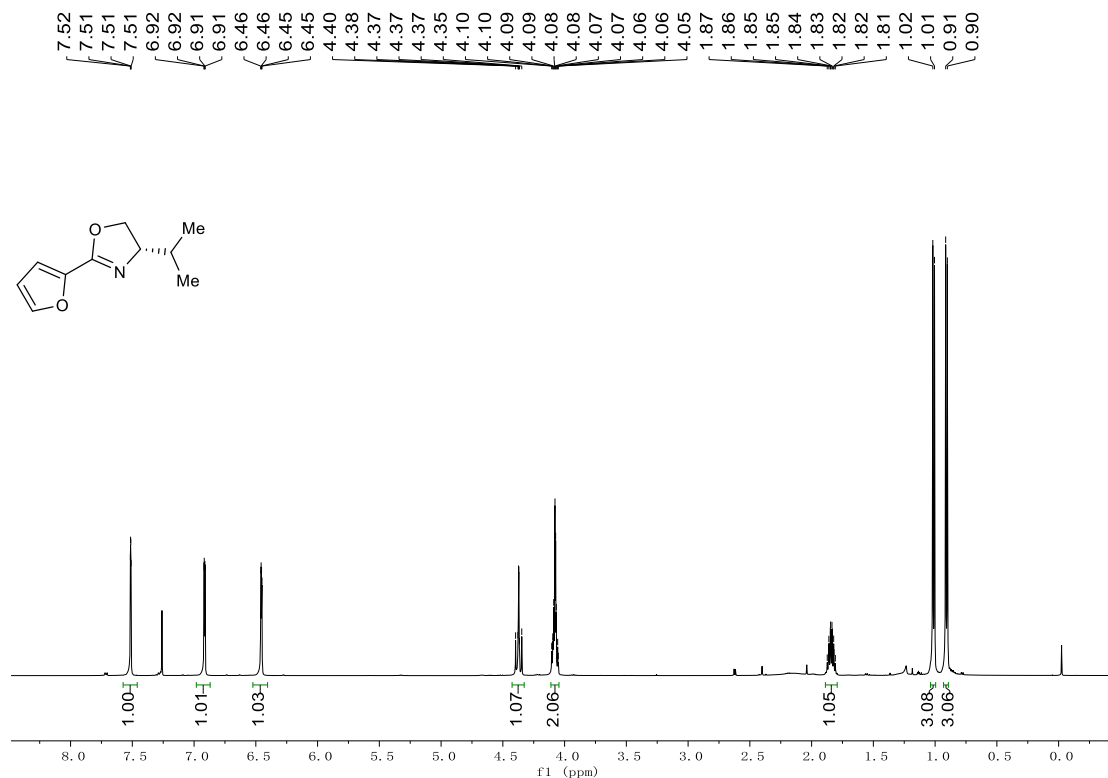

**32,  $^{13}\text{C}$  NMR (126 MHz,  $\text{CDCl}_3$ )**

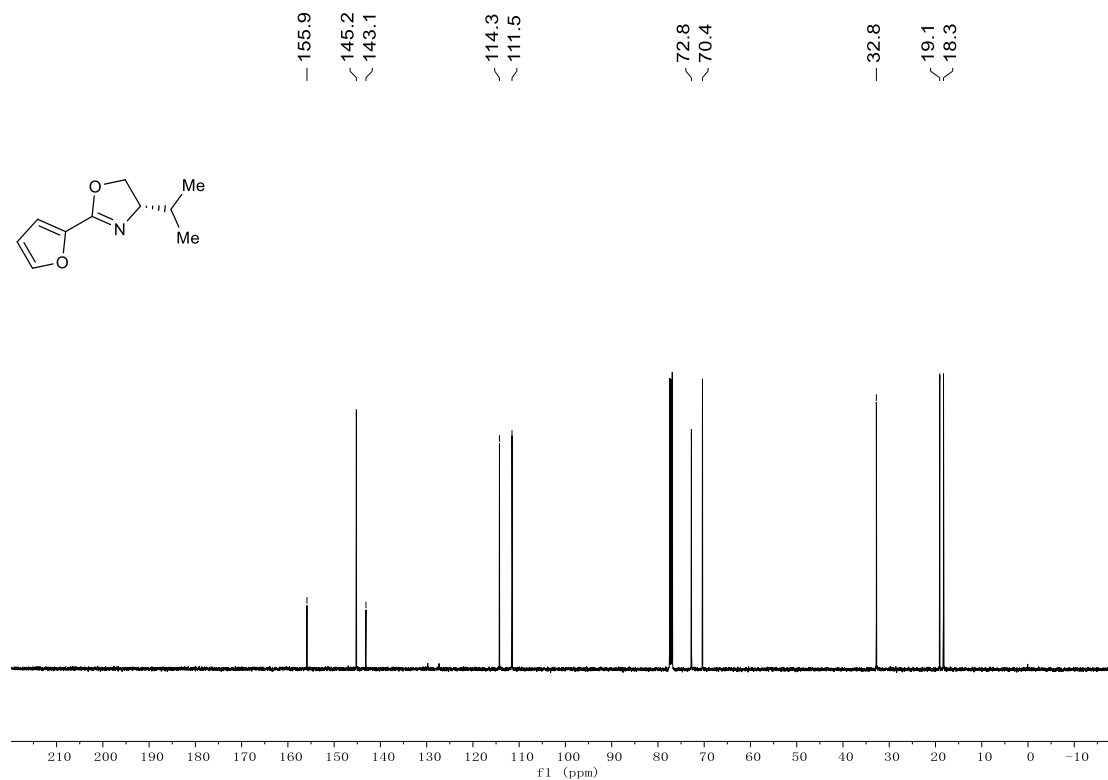

Supplement: s1 [file s1]
